# Supplementary material for: Taxonomy of breast cancer based on normal cell phenotype predicts outcome
Source: JCI journal article supplement (doi:10.1172/jci70941), 2014-01-26

## SUPPLEMENTARY MATERIAL

### I. Supplementary Figures:

**Figure S1:** Anatomy of normal human breast and expression patterns of keratins, cluster differentiation markers and hormone receptors in normal human breast.

**Figure S2:** Keratin 5, 14 and 17 expression in normal human mammary gland ducts versus lobules.

**Figure S3:** Multiplex immunofluorescent staining of normal human breast lobules.

**Figure S4:** Expression of cell specific markers in human breast tumors.

**Figure S5:** Expression of ER, AR, VDR and Ki-67 in breast cancers.

**Figure S6:** Expression of Keratin 5 and 14 in human breast tumors.

**Figure S7:** Reclassification of human breast tumors based HR0-3 categories

**Figure S8:** HR0-3 classification of human breast cancer cell lines

**Figure S9:** Drug response of HR1-3 breast cancer cell lines to combined hormone treatment.

### II. Supplementary Tables:

**Table S1:** Antibodies used in this study.

**Table S2:** Quantitation of breast differentiation markers.

**Table S3:** Table demonstrating normal cell counterparts corresponding to breast tumor phenotypes.

**Table S4:** Normal human breast luminal and myoepithelial markers

**Table S5:** Means and frequencies of participants' characteristics by cross-classified ER/AR/VDR status (N=1731), Nurses' Health Study (1976-1996).

**Table S6:** Multivariate analysis of breast cancer specific mortality by hormone receptor categories (HR0, HR1, HR2, and HR3), Nurses' Health Study (1976-1996).

### III. Supplementary Materials and Methods

### IV. Supplementary References

### V. Images corresponding to Table S2

## SUPPLEMENTARY FIGURES

**Figure S1: Anatomy of normal human breast and expression patterns of keratins, cluster differentiation markers and hormone receptors in normal human breast.**

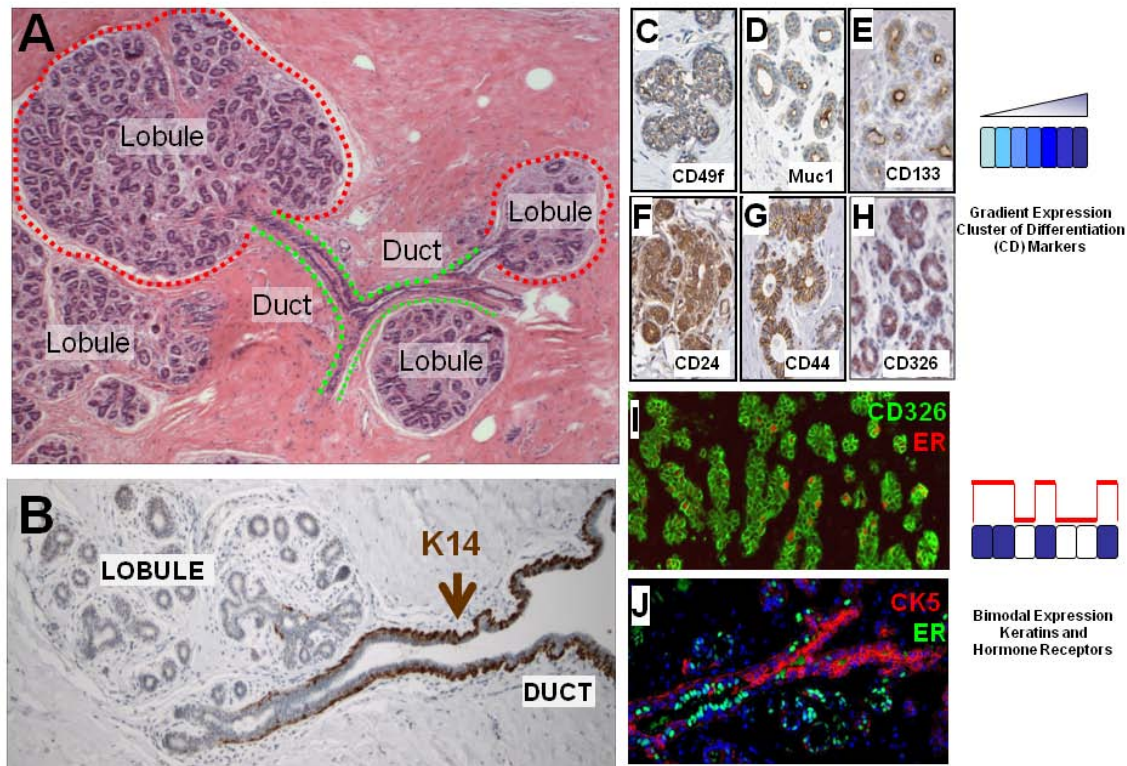

**(A)** H&E stained section of normal human breast epithelium, showing lobules and interlobular ducts (40x).

**(B)** Immunohistochemistry for K14 on normal human breast epithelium. While the interlobular ducts stain with K14 (brown) in the myoepithelial cells only, the majority of myoepithelial cells in the lobules are negative for K14 in this section (100x).

**(C-H)** Immunohistochemistry for cluster differentiation markers CD49f, Muc1, CD133, CD24, CD44 and CD326 (Ep-CAM), revealed a gradient of expression; while some cells expressed lower levels and others higher levels, there were not distinct positive and negative populations. There was no differential expression between ducts and lobules (100x).

**(I)** Immunofluorescence staining for ER and CD326 (Ep-CAM) shows that both ER+ and ER- cells are CD326+. Thus, there is no correlation between the expression of these two markers. ER=red, CD326=green (100x).

**(J)** Immunofluorescence staining for ER and K5 shows that ER+ and K5+ staining are bimodal (biphasic). Unlike the CD markers there was a clearly positive and a negative cell population for each marker, and ER+ and K5+ were mutual exclusive, i.e., if a cell is K5+ it is almost always ER-, and vice versa. ER=green, K5=red (100x).

See <http://sylvester.org/ince/supplemental-material> for original high resolution images and additional examples.

**Discussion:** We evaluated the *in situ* expression of putative breast stem cell markers such as CD44, CD24, CD326 (Ep-CAM), and CD133 with specific attention to breast lobules. Many of these CD surface markers have been useful to distinguish different hematopoietic cell subtypes from each other due to their cell-type specific expression. Several of these markers have been used to enrich putative breast stem cell populations with FACS (1). Based on the hematopoietic paradigm, we expected that there would be two distinct luminal cell layer subpopulations (positive and negative) in normal breast tissue with each of these markers. However, immunohistochemical staining of normal human breast tissue sections for these putative breast stem cell markers - CD24, CD44, CD49f, CD133, CD326 (Ep-CAM) and Muc1 - did not discriminate distinct subpopulations of breast cells. Surprisingly, they were broadly expressed in the vast majority of breast epithelial cells in whole tissue sections evaluated by standard immunohistochemistry. Although there was a gradient of staining intensities, distinct positive and negative populations were difficult to discern. Also, we did not observe any differences in the expression of these markers in lobules vs. ducts. In the end, many of the classic CD markers did not prove to be useful in distinguishing between luminal breast cell types when examined *in situ* with immunostains. It is worth noting that enzymatic digestion of solid tissues for long periods with collagenase and trypsin at 37°C is necessary to generate single cell suspensions for FACS analysis. Thus, it is possible that some of the apparent CD-marker negative breast cell sub-populations previously reported using FACS analysis may have emerged due to surface protein degradation during tissue digestion (2). Another possible reason might be the differences between the sensitivity and dynamic range of FACS vs. *in situ* staining. In addition, since FACS is more quantitative than IHC, it allows isolation of subpopulation of cells using markers that are expressed in a gradient pattern.

**Figure S2: Keratin 5, 14 and 17 expression in normal human mammary gland ducts versus lobules.**

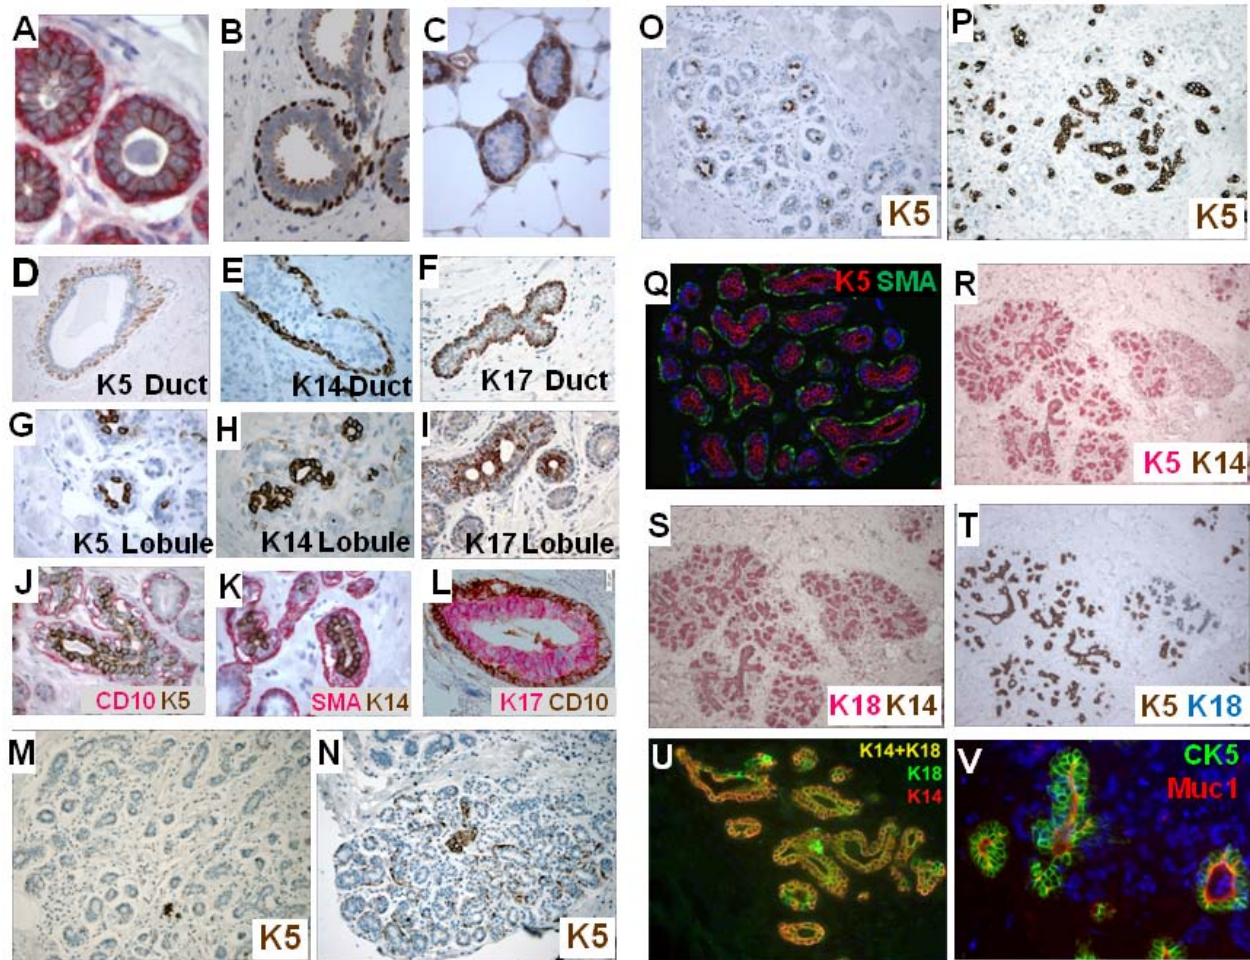

**(A)** Double immunostains show that all luminal cells express Claudin-4 (brown) and all myoepithelial cells express SMA (red) (600x). **(B)** All myoepithelial cells express p63 (600x). **(C)** Keratin 5 immunostains of mouse mammary glands show that K5 is expressed only in the myoepithelial layer, unlike human breast that has abundant luminal K5 expression (K5=brown,400x). **(D-F)** Keratins 5, 14 and 17 are expressed in the myoepithelial (basal) layer in the interlobular ducts of normal human breast tissue (K5, 14, 17=brown; blue counter stain, 100x). **(G-I)** Keratins 5, 14 and 17 are expressed in the luminal layer in the lobules of normal human breast tissue (K5, 14, 17=brown; blue counter stain, 200x). **(J-L)** Double immunostains with pan-myoepithelial markers CD10 and SMA show that K5/14/17 cells are located above the CD10/SMA+ myoepithelial cells next to the lumen. K5 brown (J), K14=brown (K), K17=red (L), CD10=red (J), SMA=red (K), CD10= brown (L) (J-K= 200x, L=400x). **(M-O)** The frequency of K5+ cells can be dramatically different from lobule to lobule even in the same section from the same person; in many lobules there are almost no K5+ cells (M,

100x), and in rare lobules K5 is expressed in some of the myoepithelial cells but not in luminal cells (N, 100x). In many lobules nearly half of the luminal cells are K5+ (O, 100x). **(P-Q)** In some lobules almost all the luminal cells are K5+, either with single K5 stain (Brown, 100x), or with double immunostain that confirms the luminal nature of these cells (K5=red, SMA=green 200x). **(R-T)** Double immunostaining of serial sections of the same lobule show that in some lobules nearly all the cells are K5 and K18 double positive. K5 red, K14 brown (Q), K18 red, K14 brown (R), K5 brown, K18 Blue (S). In these double IHC stains both markers are cytoplasmic and the brown stain is dominant. Thus absence of brown in panel R suggest that the large lobule on left is almost entirely composed of red (K5+/K14-) cells and absence of brown in panel S indicates that the same cells are K18+/K14-. In panel T, the brown K5 staining confirms that the large lobule on the left is almost entirely composed on K5+/K18+ double positive cells, with a small lobule on the right that is blue consistent with a K5-/K18+ lobule (20x). **(U)** Consistent with double IHC results in panels R-T, double IF stains show that in some lobules almost all luminal cells are double K18 and K14 positive. K18=green, K14=red, K14/18 double positive cells=yellow (200x). **(V)** Most of the K5 luminal cells express Muc1, a marker of differentiation. K5=green, Muc1=red (400x). See <http://sylvester.org/ince/supplemental-material> for original high resolution images and additional examples.

**What might be the roots of the common misconception that K5/14/17 are basal keratins?** The difference in keratin 5, 14 and 17 expression patterns between ducts and lobules highlights one of the shortcomings of using homogenized tissue fragments for research as opposed to *in situ* examination. One of the reasons we refer to 'omics' approaches as having **low morphologic resolution** is because in most of these studies mRNA or protein profiles derived from normal or tumor lysates are extracted from a mm<sup>3</sup>-cm<sup>3</sup> fragments of tissue. Naturally, such an approach completely misses the important anatomical differences in expression of K5, K14, K17, such as differences between ducts vs. lobules. Another contributing factor leading to the wide-spread mistaken belief about K5, K14 and K17 might be over-generalizing results among species. For example, K5/14 are indeed exclusively basal (myoepithelial) keratins in mouse mammary tissue. It seems that some have extrapolated these findings to human breast, without careful examination. A third reason might be over-generalizing mRNA expression data. It has been shown that for many keratins there is only a weak correlation between mRNA and protein levels, which might have resulted in referring to some cells as basal due to keratin mRNA expression, even though these cells express very low protein levels for these keratins (3). Lastly, others before us have pointed out in several papers that K5/14 are expressed in the luminal layer (4-8). K5/14/17, however, are still referred to as basal keratins by most, perhaps partly because some papers that contain important histopathological findings are still published without expert pathologist involvement or review (9).

**Figure S3: Multiplex immunofluorescent staining of normal human breast lobules.**

**S3A: Normal human breast lobule with high AR and VDR expression.**

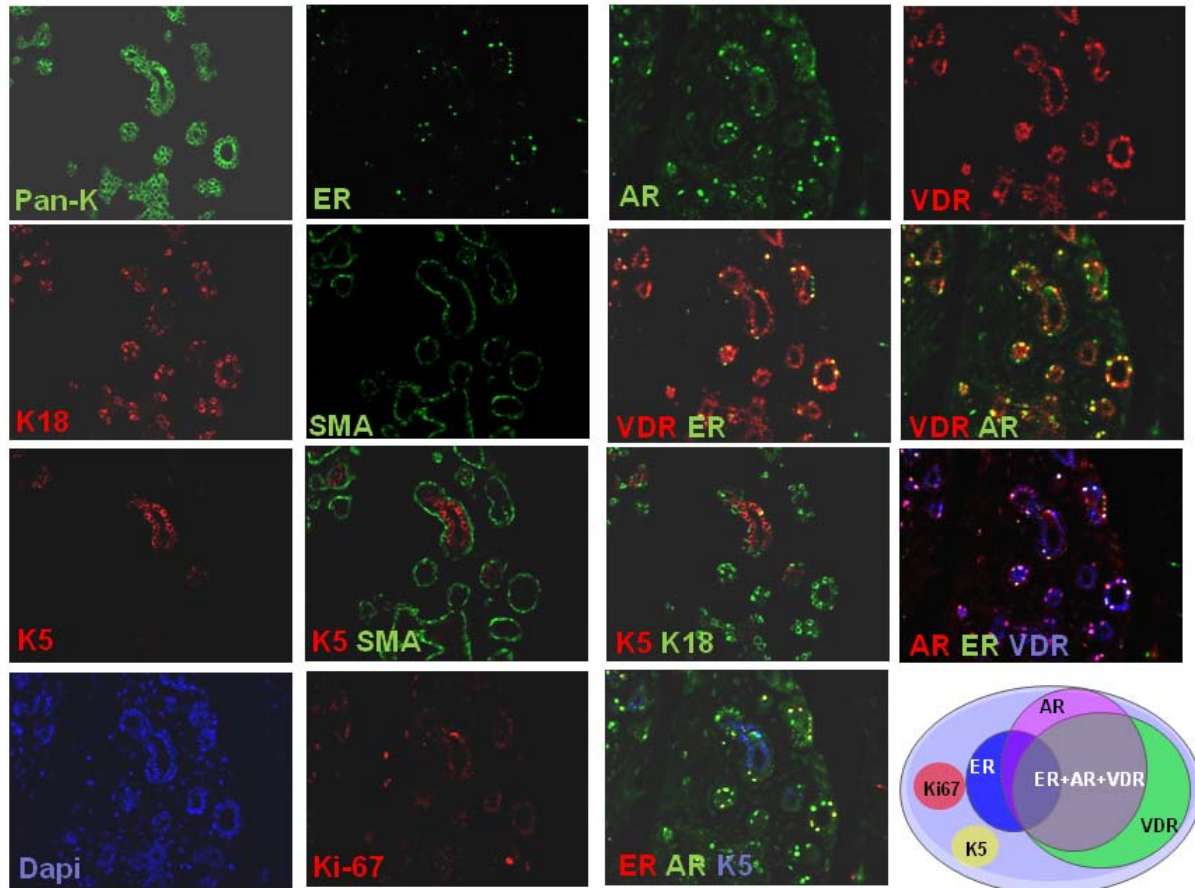

Example 2 of multiplexed immunofluorescence using the GE Healthcare multiplexed marker platform (example 1 is shown in Figure 3). The same section of normal breast epithelium was evaluated serially for markers Pan-K, K18, K5, ER, SMA, Ki-67, AR, and VDR. Merged images for selected images are shown (200x). Na-K ATPase and CD10 (see supplemental data). A Venn diagram depicting the dynamic relationship of the various markers in this case is shown. This lobule is predominantly composed of AR+VDR+ and AR/VDR+ cells. The ER+, K5+ and Ki-67+ cells are rare. Representative images from GE Healthcare multiplexed immunofluorescence marker platform are shown (see supplemental data for the remaining images). It has been proposed that 'microdissection' of tissue may improve the quality of -omics approaches, which can be the case in tumors. However, the cell-to-cell diversity we describe here makes this all but impossible for normal tissues. Thus, datasets that use normal bulk tissue as a control completely miss the normal tissue diversity, which skews tumor vs. normal comparisons. See <http://sylvester.org/ince/supplemental-material> for original high resolution images and additional examples.

**3B: Normal human breast lobule with high VDR/K5 expression.**

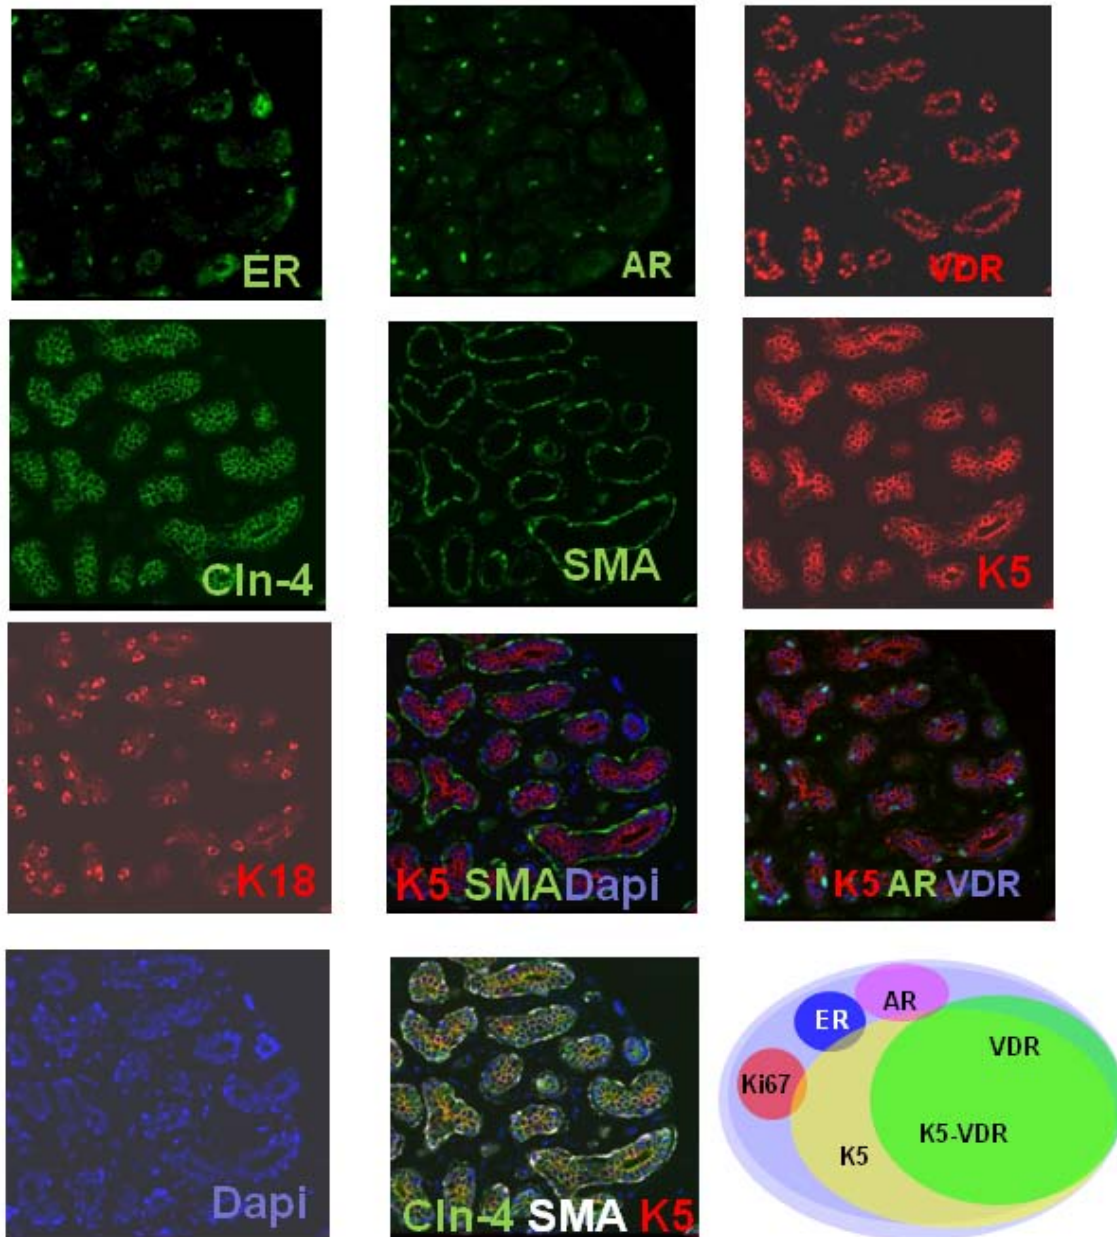

The same section of normal breast epithelium was evaluated serially for markers ER, AR, VDR, Cln-4 (Claudin-4), SMA, K5, K18. Merged images for selected images are shown (400X). A Venn diagram depicting the dynamic relationship of the various markers in this case is shown. This lobule is predominantly composed of K5+, VDR+ and K5/VDR+ cells. The ER+, AR+ and Ki-67+ cells are rare. Representative images from GE Healthcare multiplexed immunofluorescence marker platform are shown. See <http://sylvester.org/ince/supplemental-material> for original high resolution images and additional examples.

### S3C: Multiplex image analysis of normal human breast lobules.

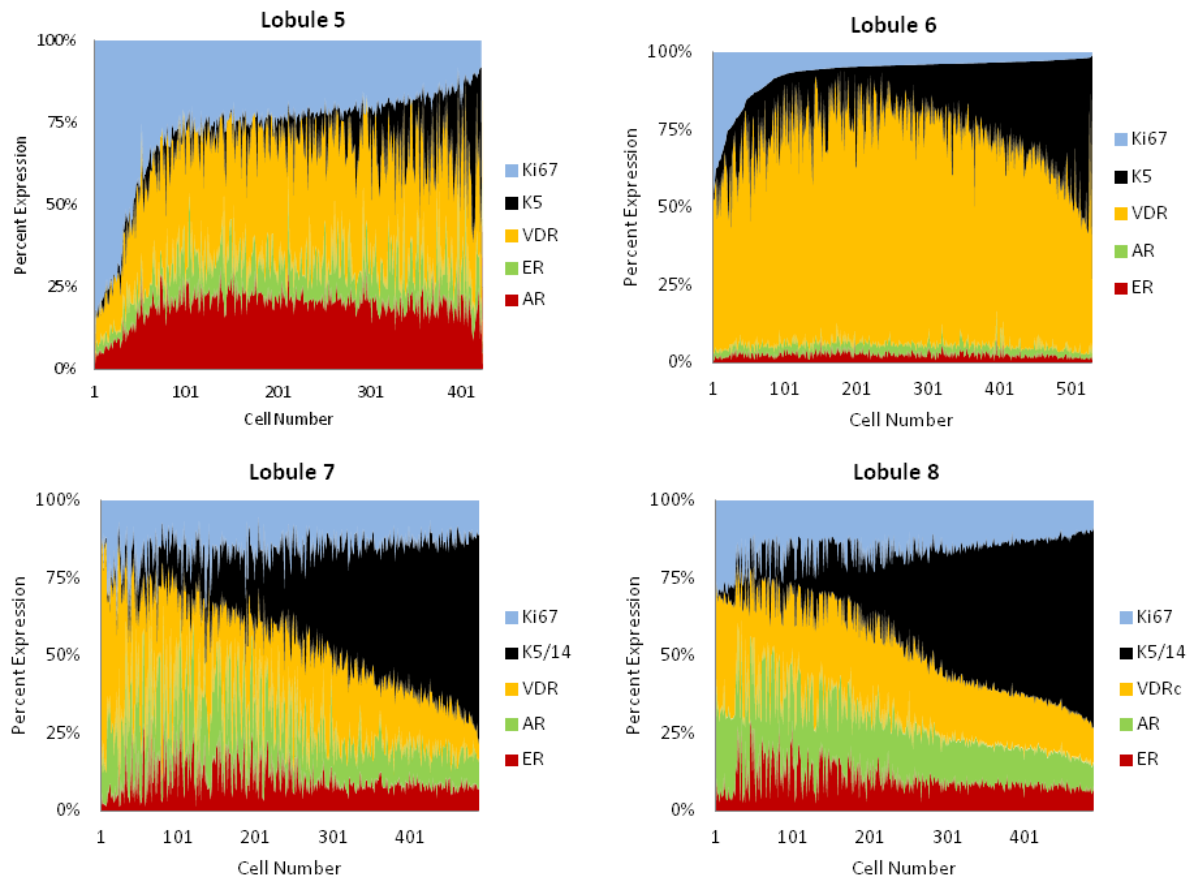

Histograms show the relative ER (red), AR (green), VDR (yellow), K5 (black) and Ki67 (blue) expression in each cell. The cells are numbered in the abscissa (x-axis), and relative contribution of each marker to the total fluorescence of each cell is expressed as a percentage of the total (ordinate, y axis). The results were sorted from low Ki67 to high Ki67 values. Immunofluorescence images show the eight lobules that were analyzed. Lobule 5 is an example of lobule with high ER/AR/VDR (HR) and low K5. The more proliferative cells with high Ki67 where >75% of the total fluorescence comes from Ki67 (~ cells 1-25) express lower levels of HR. Lobule 6 is an example of a lobule dominated by VDR+ and VDR/K5+ cells. As expected the proliferating Ki67+ cells are low in this lobule. Lobule 7 and 8 are examples of average lobules that are a mixture of all cell types. Nevertheless, cells with lower numbers express high HR and low K5, and as HR expression decreases K5 increases. Since these two lobules are dominated by HR and K5, the Ki67 high proliferative cells are rare.



### S3C: Multiplex image analysis of normal human breast lobules (400X)

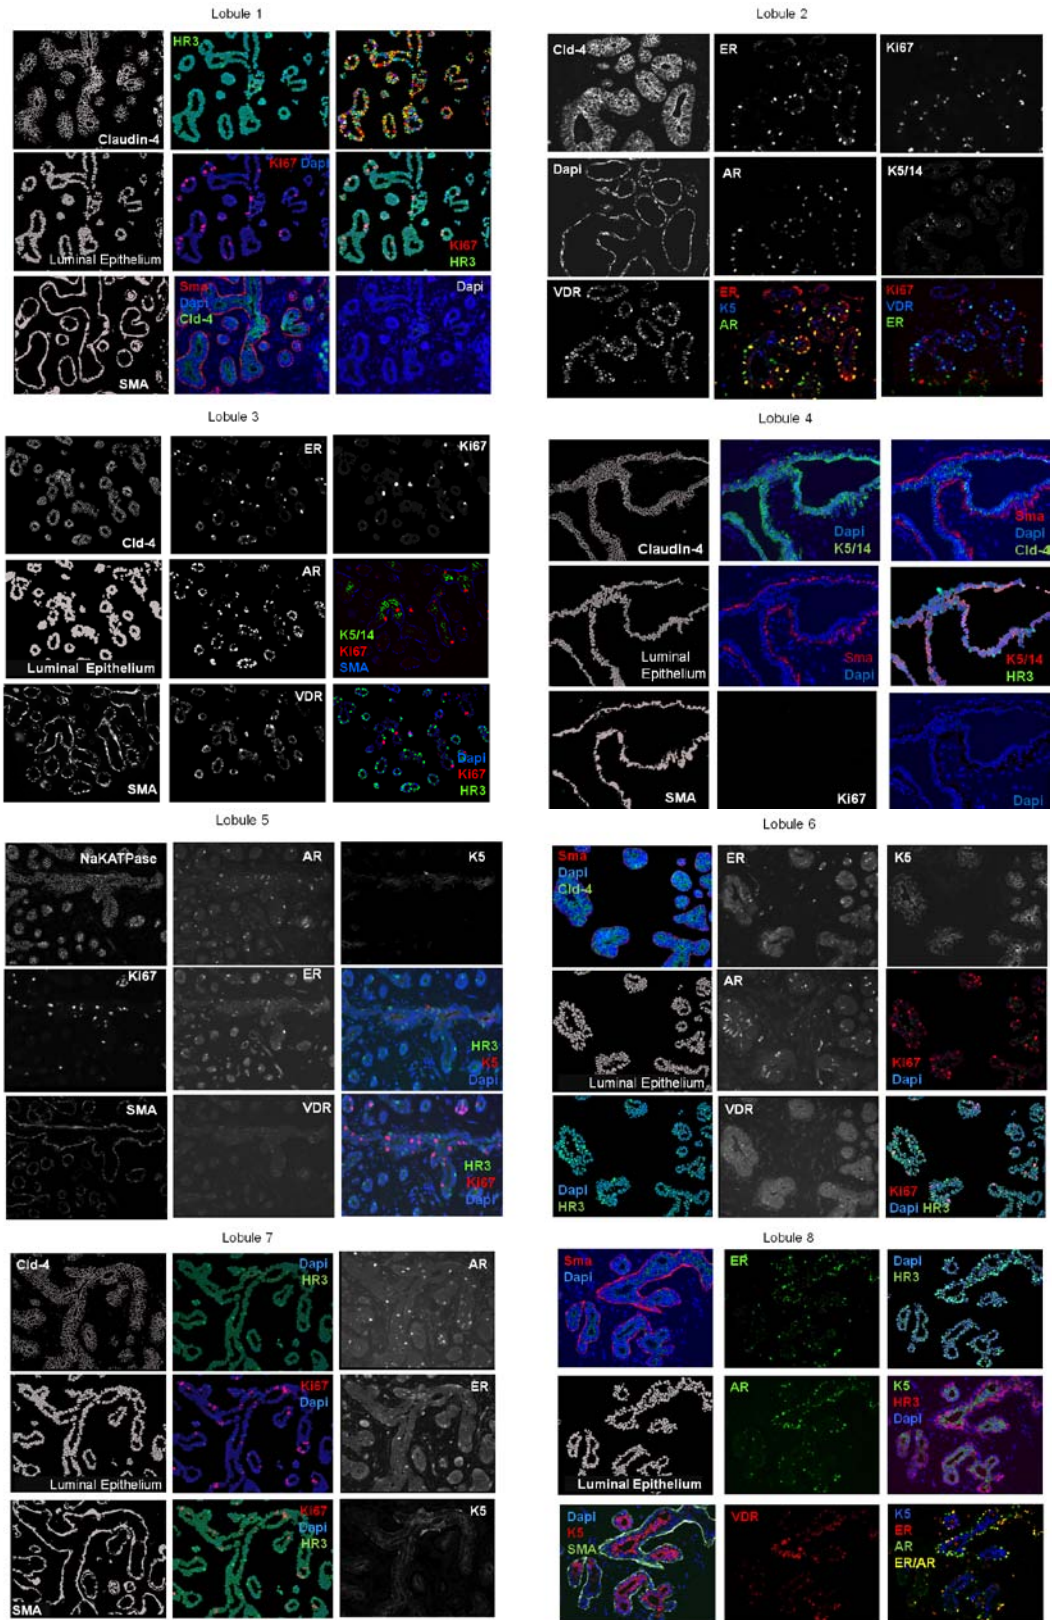

### S3D: Models of normal breast cell diversity.

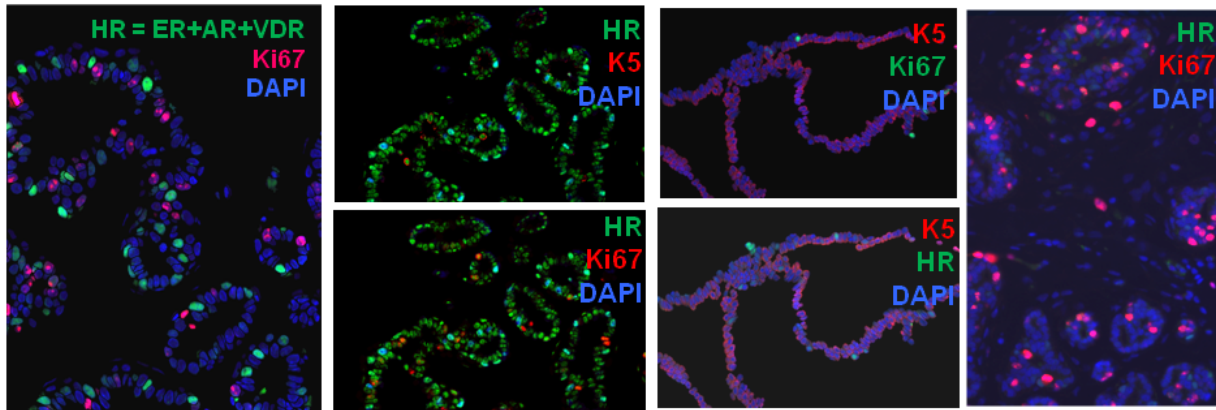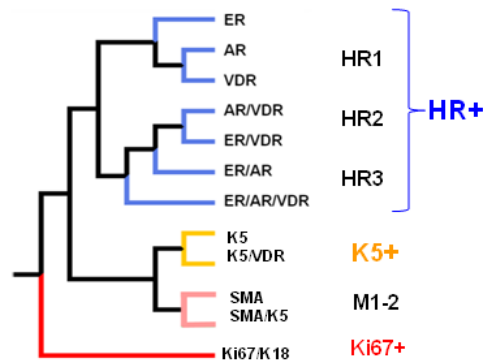

Merged images of multiplexed immunofluorescence staining on the same section are shown. **(Left Column)** typical breast lobule with moderate levels of HR expression and mutually exclusive Ki-67 positive proliferating cells (red); **(Second Column)** Breast lobule that is almost entirely composed HR+ cells (green) with infrequent K5+ (**top**) and Ki-67+ (**bottom**) cells (red); **(Third Column)** Breast lobule that is almost entirely composed K5+ cells (red), with infrequent Ki-67+ (**top**) and HR+ (**bottom**) cells (green); **(Fourth Column)** Highly proliferative breast lobule with numerous Ki-67+ cells (red), with no HR+ cells (green); **(Lower Panel)** Using a phylogenetic analysis software (Mesquite), we constructed an inferred possible differentiation lineage tree of the breast cell subtypes. According to this model it appears that all the HR+ cells have a common progenitor that is different from the common progenitor of K5+ luminal cells and myoepithelial cells (M1-2). The common progenitor of all three groups (HR+, K5+, and M1-2) appears to be a Ki-67/K18+ and HR/K5/SMA- cell consistent with a proliferating transit-amplifying progenitor cell type. See <http://sylvester.org/ince/supplemental-material> for original high resolution images and additional examples.

**Figure S4: Expression of cell specific markers in human breast tumors.**

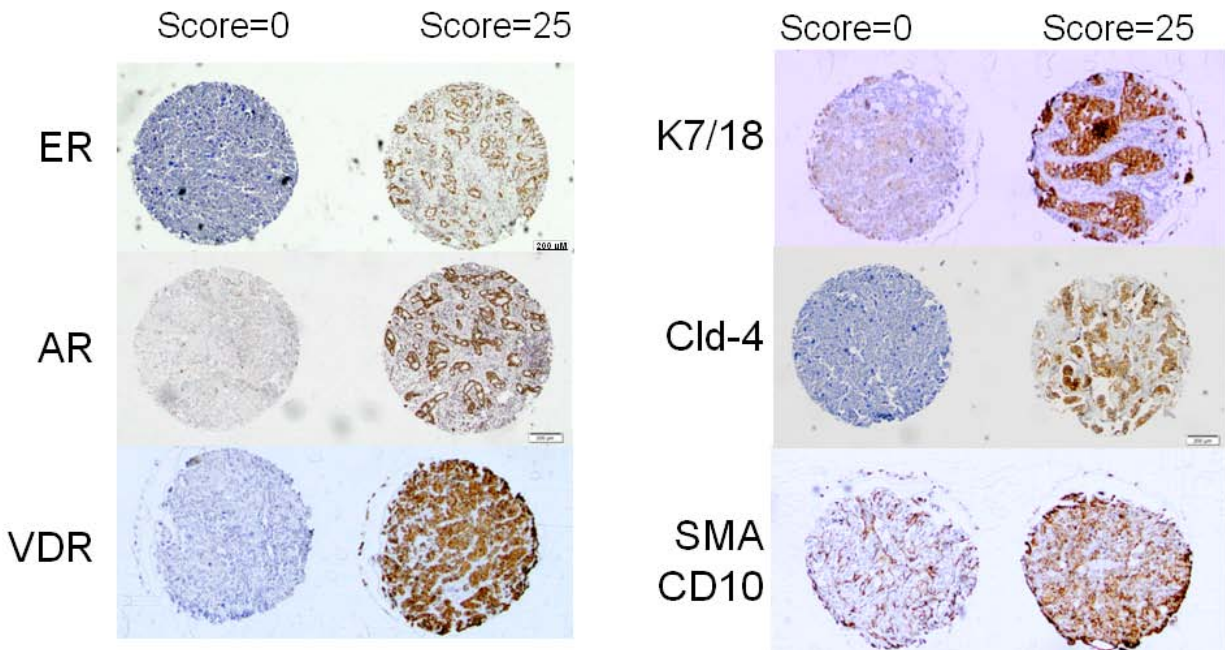

Similar to normal tissues, ER, AR, VDR, K5, K7, K14, K18, Cld-4, SMA, CD10 were expressed in a binomial pattern in tumors. A typical example for each marker is shown in adjacent cores in the TMA; negative cores on the left (<1% staining, and 0 intensity = score of 0) and positives core on the right (>80% staining, and 5 intensity = score of 25). These cores were adjacent to each other on the TMA (scale bar= 200  $\mu$ m). One of the advantages of *in situ* staining is the ability to discriminate cell specific expression; for example SMA/CD10 were strongly expressed in the tumor cells in some cases (core on the right with score of 25), and in the stromal cells in other cases (core on the left with a score of 0). This kind of cell type specific expression information is lost in molecular analysis of tumor extracts.

**Figure S5: Expression of ER, AR, VDR and Ki-67 in breast cancers.**

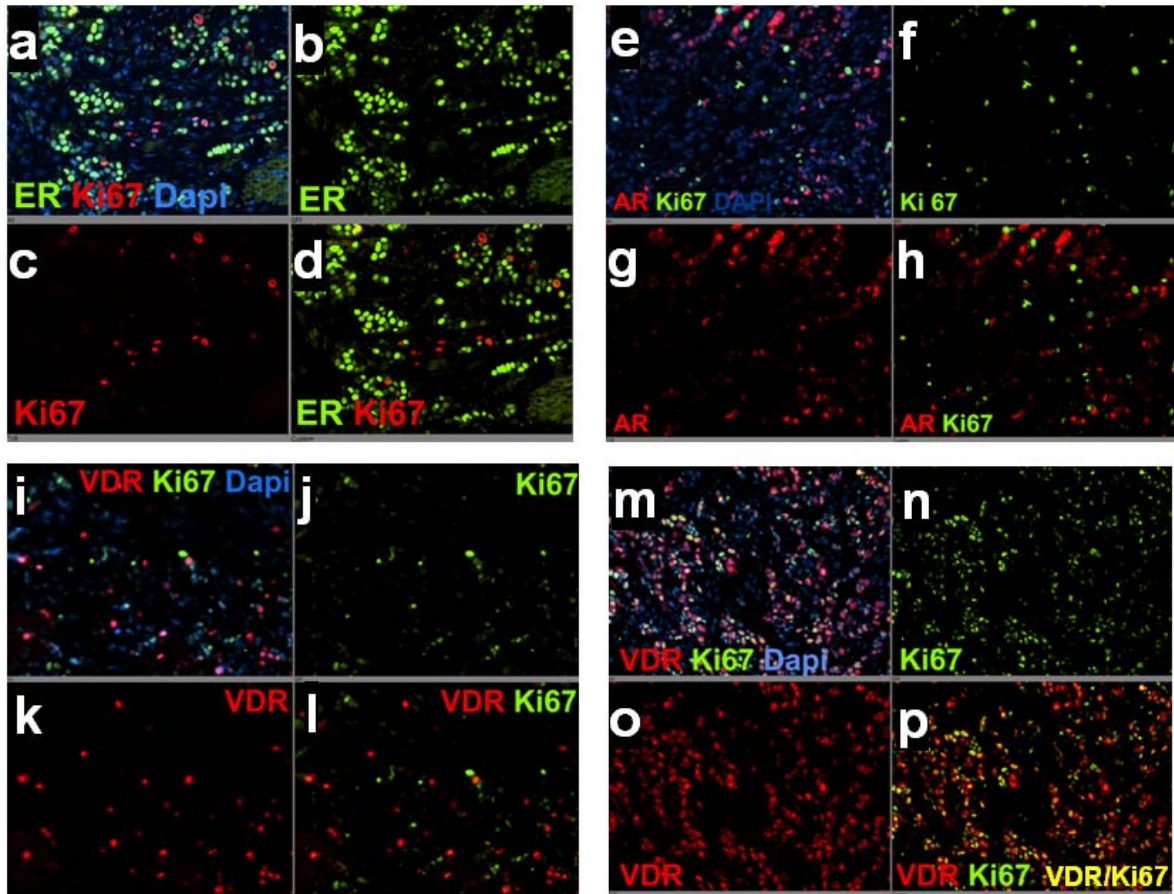

**(A-D)** Majority of Ki-67+ tumor cells were mutually exclusive with ER+ tumor cells (200x).

**(E-H)** Majority of Ki-67+ tumor cells were mutually exclusive with AR+ tumor cells (200x).

**(I-L)** Ki-67+ tumor cells were generally mutually exclusive with VDR+ tumor cells (200x).

**(M-P)** In some areas the VDR+ tumor cells were Ki-67+, indicating that in tumors the relationship between VDR expression and proliferation is different than ER and AR (200x).

See <http://sylvester.org/ince/supplemental-material> for original high resolution images and additional examples.

**Figure S6: Expression of Keratin 5 and 14 in human breast tumors.**

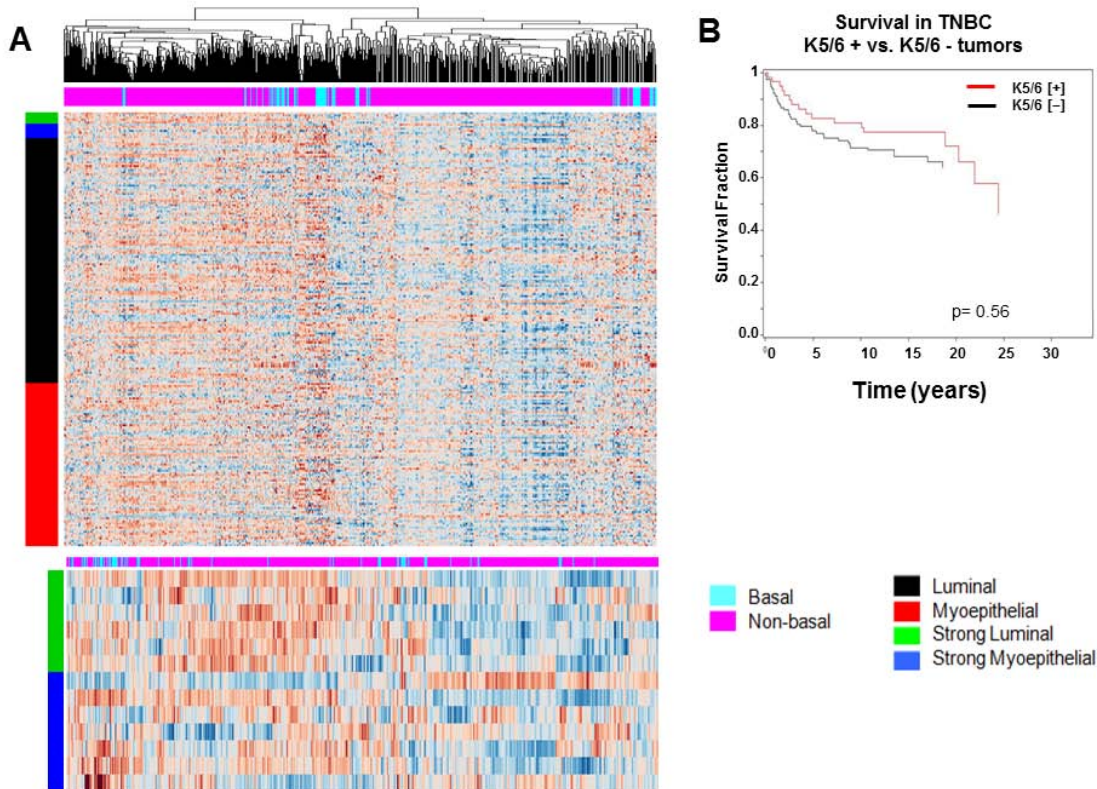

**(A)** Analysis of mRNA in normal human breast cells. The normal luminal vs. basal specific profiles were derived by combining three different studies that profiled highly purified luminal vs. myoepithelial cells (10, 11). A subset of mRNAs were differentially expressed between luminal (131 transcripts, Table S4A) and myoepithelial cells (90 transcripts, Table S4B) consistently in all three studies – these served as the basis for strong luminal (green bar) and strong myoepithelial (dark blue) consensus signatures; differential expression in two of three studies formed the basis for luminal (black) and myoepithelial (red) signatures, depicted with the colored bars on the left hand side of the heatmap (12-15). When a combined human breast mRNA expression dataset was analyzed for the expression of these luminal basal genes, there was no significant difference between basal tumors vs. luminal (non-basal) tumors, marked with colored bars above the heatmap; basal tumors (light blue) vs. luminal (non-basal) tumors (pink). Rows = genes, columns = tumor sample from each patient; over-expression = orange, under-expression = blue. See supplemental table 4 for the list of luminal and myoepithelial specific transcripts.

**(B)** Kaplan–Meier analysis of all individuals with triple negative invasive breast cancer from the Nurses’ Health Study that were scored by K5/6 immunohistochemistry (n=172). There was no statistically significant survival difference between the K5/6+ (n=59) vs. K5/6- (n=113) tumors ( $p=0.56$ ).

**Figure S7: Reclassification of human breast tumors based HR0-3 categories**

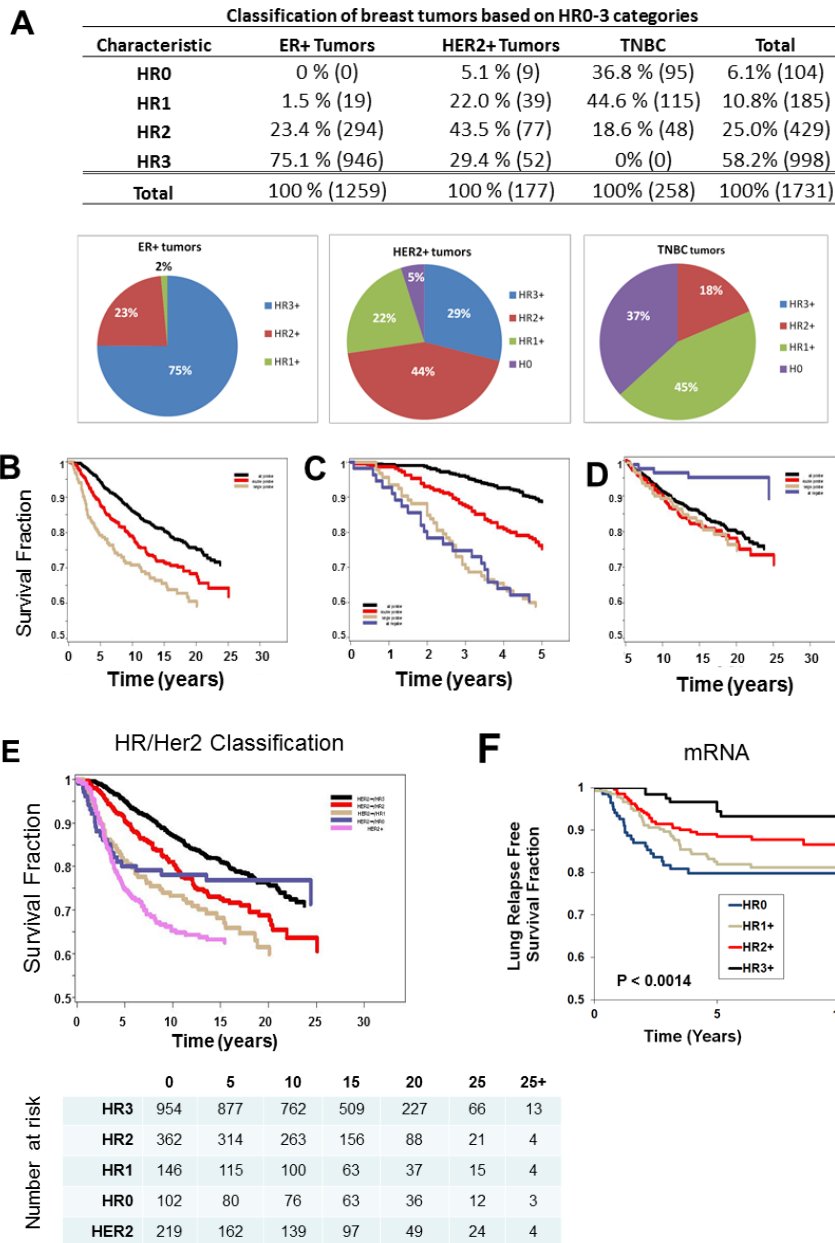

**(A)** Table showing the frequency of HR 0, 1, 2 and 3 tumors in the clinical categories of ER+, HER2+ and TNBC and pie charts showing the composition of breast tumors based on HR classification. **(B-D)** Kaplan–Meier analysis of all individuals with invasive breast cancer from the Nurses’ Health Study that were scored by immunohistochemistry in this study according to hormone receptor categories (HR3+ = black curve, HR2+ = red curve, HR1+ = yellow curve, HR0 = blue curve). We examined survival of HR1-3 only as a continuous variable during 0-25 years (B), HR0-3 during 0-5 years (C), and HR0-3 during 5-25 years (D). **(E)** Kaplan–Meier analysis of all individuals with invasive breast cancer from the Nurses’ Health Study. In this analysis the patients with HER2+ tumors were analyzed as a distinct group (HR3+ = black curve, HR2+ = red curve,

HR1+ = yellow curve, HR0 = blue curve, HER2+ = pink curve). (F) Kaplan-Meier analysis of lung metastasis free survival for all invasive breast cancers from an 855 patient breast tumor dataset (16). Tumors were ranked according to gene expression values for ER and scored as 'ER\_High' or 'ER\_Low' based on a 50% cut-off point. The same approach was used to identify 'AR\_High and AR\_Low' groups, as well as 'VDR\_High' or 'VDR\_Low'. These groups were then assembled based on HR status.

**Figure S8: HR0-3 classification of human breast cancer cell lines**

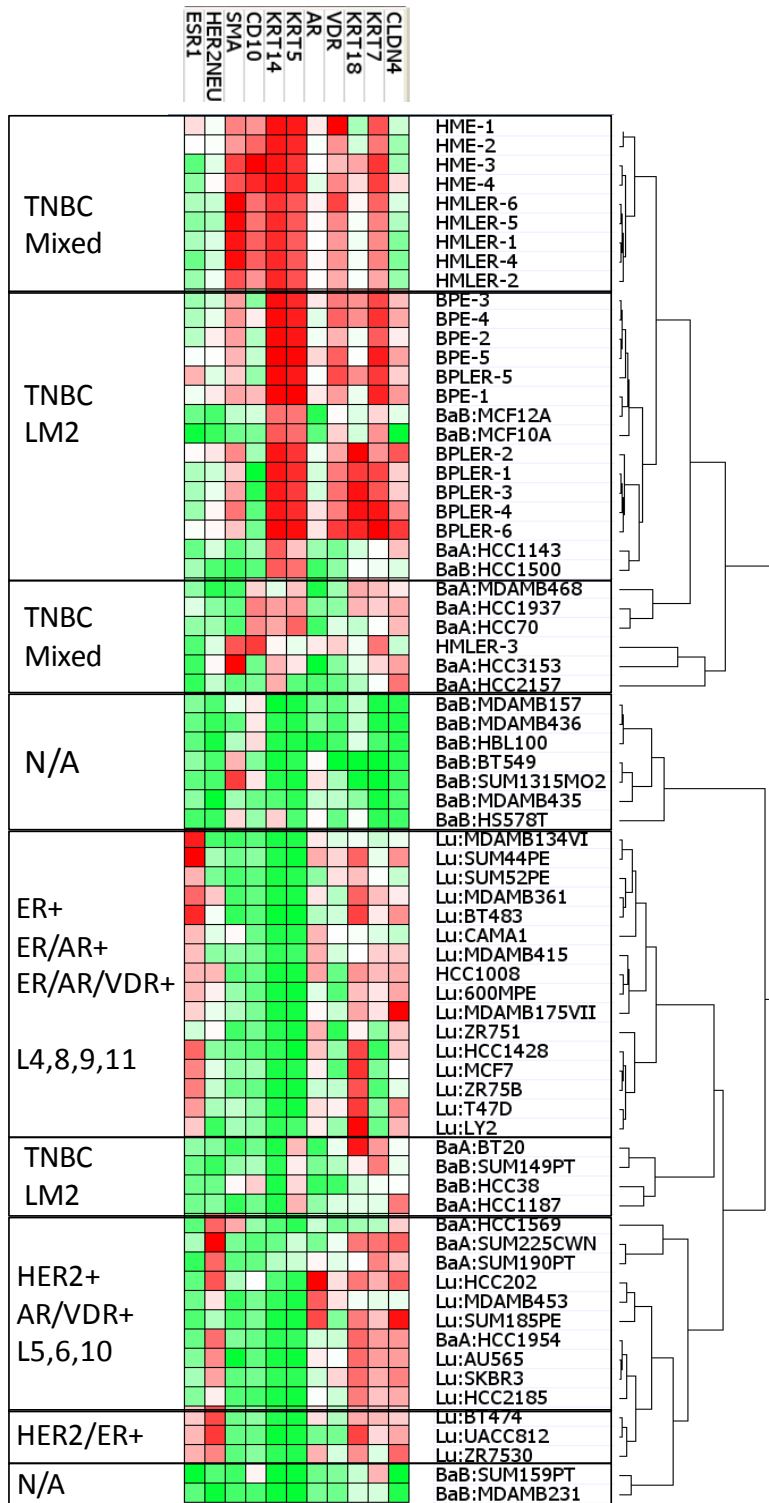

**A)** Breast cancer cell lines were clustered by mRNA expression of differentiation state transcripts (Cld-4, K7, K18, VDR, AR, K5, K14, CD10, SMA, HER2, and ER) and grouped according to the normal cell phenotypes L1-11. We found that ER+ cancer cell lines are similar to normal cell types L4, L8, L9 and L11, and HER2+ cell lines are similar to L4-11 (Table S3). The majority of triple negative breast cancer (TNBC) cell lines were similar to L3 cell type (LM2) or had a mixed phenotype. Interestingly, none of the TNBC cell lines conformed to the L2-like (LM1) phenotype, even though such tumors are nearly one third of TNBC tumors. Furthermore, nine cell lines that are frequently used as models of TNBC such as; MDA-MB-231, MDA-MB-436, MDA-MB-157, MDA-MB-435, SUM-159PT, SUM1315, HBL100, BT549, and HS578T had an expression profile that was not present either in normal breast cells or in human breast cancers (i.e. negative for nearly



all of the HR and epithelial markers), classified here as no in vivo counterpart (n=9, N/A). Thus, while ER+ and HER2+ cell lines generally appear conform to the expected *in vivo* HR phenotypes, the TNBC cell lines do not fully recapitulate the in vivo spectrum. Clustering was performed as described in the Supplementary Materials and Methods. Red indicates a relative increase in expression, green indicates a relative reduction in expression and white indicates no change.

**B)** The HR phenotype of breast cancer cell lines confirmed with Western blots.

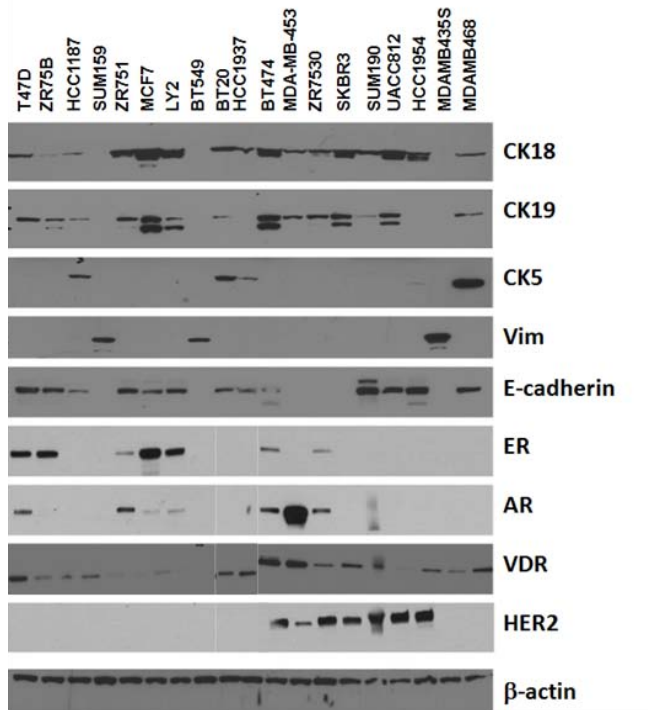

**C)** The subset of breast cancer cell lines with HR0-3 phenotypes that are selected for drug response experiments.

| Phenotype | Breast Cancer Cell Line | ER | AR | VDR | HER2 |
|-----------|-------------------------|----|----|-----|------|
| HR0       | BT549                   | -  | -  | -   | -    |
| HR1       | BT20                    | -  | -  | +   | -    |
| HR1       | MDA-MB-468              | -  | -  | +   | -    |
| HR1       | SUM159                  | -  | -  | +   | -    |
| HR2       | ZR75B                   | +  | -  | +   | -    |
| HR3       | T47D                    | +  | +  | +   | -    |
| HR0       | UACC812                 | -  | -  | -   | +    |
| HR1       | SKBR3                   | -  | -  | +   | +    |
| HR2       | MDA-MB-453              | -  | +  | +   | +    |
| HR3       | BT474                   | +  | +  | +   | +    |

**Figure S9: Drug response of HR1-3 breast cancer cell lines to combined hormone treatment.**

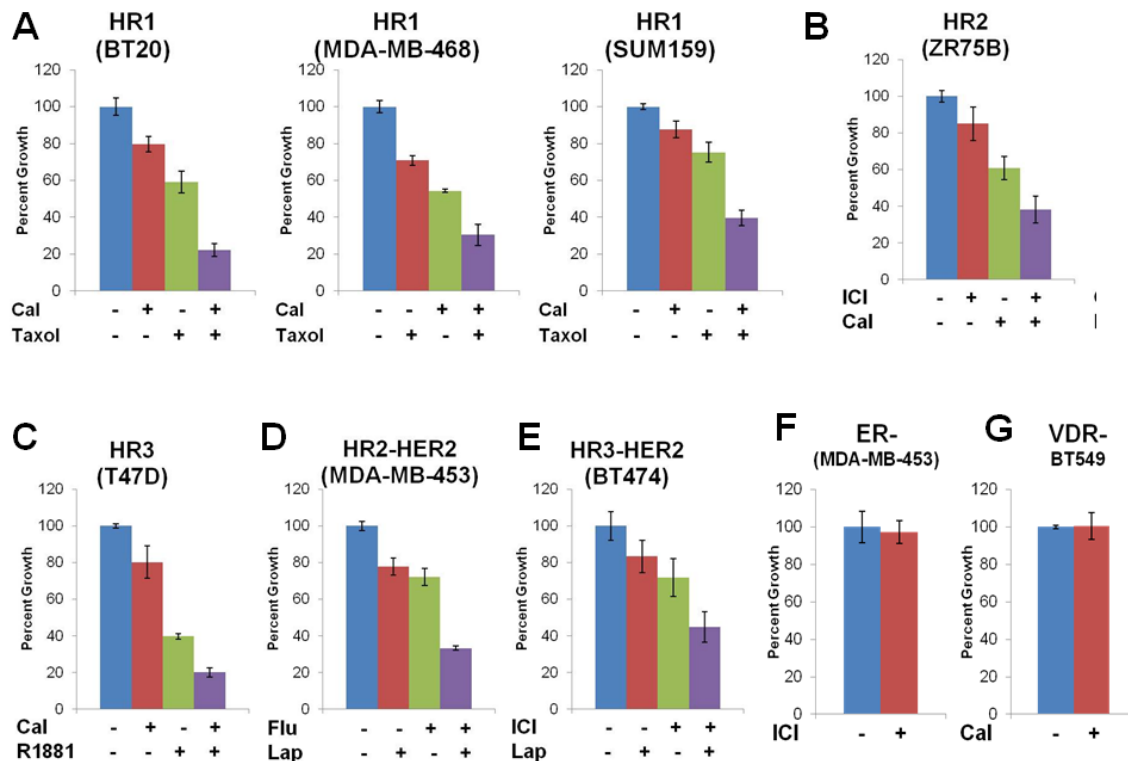

In all experiments described below low doses of individual drugs (< 50% inhibition) were used in order to demonstrate the additive effect of two drugs combined. Each experiment was repeated multiple times with similar results; representative results from one experiment are shown.

**(A) VDR and Taxol combination treatment of HR1 cell lines:** The ER/HER2 negative breast cancer cell lines BT20, MDA-MB-468 and SUM159 are traditionally considered TNBC models, hence not candidates for hormone treatment. However, according to our HR classification these HR1 (VDR+) tumors can be candidates for treatment with VDR agonists, which we hypothesized would inhibit their proliferation. Consistent with this we observed a reduction in proliferation when these HR1 breast cancer cells were treated with VDR agonist Calcitriol (Cal, 25nM) alone or in combination with a chemotherapeutic such as Taxol (0.5nM or 1nM). Interestingly the combined effect of these drugs was greater than either drug alone, indicating an additive effect. In the clinical setting this may allow using less toxic doses of each drug with the same efficacy as using higher doses of Taxol alone. These results indicate that combining VDR agonists with chemotherapy should be explored further for in HR1 subtype of TNBC in combination with chemotherapy.

**(B) ER and VDR combination treatment of HR2 cell lines:** The breast cancer cell line ZR75B is a model of ER/VDR+ HR2 tumors that could be potentially targeted with

ER/VDR combination hormone therapy. We tested this hypothesis by combining the ER-antagonist ICI 182,780 (Faslodex, ICI 5nM) with VDR agonist Calcitriol (Cal, 50nM); and found that the combined effect of these drugs was greater than using either drug alone. Representative results from multiple experiments are shown. These results indicate that combining ER antagonists with VDR agonists should be explored further in this subtype of HR2 breast cancers.

**(C) AR and VDR combination treatment of HR3 cell lines:** The ER+ breast cancer cell line T47D also expresses AR and VDR (HR3). In this cell line combination of AR-agonist R1881 (Methyltrienolone, 50nM) with VDR agonist Calcitriol (Cal, 50nM) inhibited proliferation more effectively than either drug alone. These experiments were carried out in phenol red free DMEM +5% charcoal stripped FBS and 17-beta estradiol (E2, 10nM) as previously described (17, 18). Representative results from multiple experiments are shown. These results indicate that combining AR and VDR agonists should be explored further in this subtype of HR3 breast cancers.

**(D) AR and HER2 combination treatment of HR2/HER2 cell lines:** The combination of AR-antagonist Flutamide (Flu 45  $\mu$ M) and HER2 inhibitor Lapatinib (Lap, 0.5 $\mu$ M) additively inhibited proliferation HR2+/HER2+ breast cancer cell line MDA-MB-453. Representative results from multiple experiments are shown.

**(E) ER and HER2 combination treatment of HR2/HER2 cell lines** The combination ER-antagonist ICI 182,780 (Faslodex, ICI 10nM) and HER2 antagonist Lapatinib (Lap, 10nM) additively inhibited proliferation HR3+/HER2+ breast cancer cell line BT474, as previously described (19). Representative results from multiple experiments are shown. The above results (M, N) indicate that combining ER and AR antagonists with HER2 targeted therapy should be explored further for HER2+/HR+ breast cancers. Our results confirm a previous study by Emde et al. in which the BT474 breast cancer cell line was treated with ICI 182,780 and Lap (19).

**(F)** In ER-negative control cell line (MDA-MB-453) no inhibition of cell proliferation was seen when it was treated with ER antagonist ICI 182,780 even at a much higher concentration (Faslodex, ICI 100nM).

**(G)** In VDR-negative control cell line (BT549) no inhibition of cell proliferation was seen when it was treated with VDR agonist Calcitriol (Cal,) at different concentrations of 10nM, 25nM and 100nM. Control and 100nM groups were shown here.

**Supplemental Table 1**

| Antibodies Used to Stain Breast Sections |                    |             |             |         |             |               |                  |                  |                  |
|------------------------------------------|--------------------|-------------|-------------|---------|-------------|---------------|------------------|------------------|------------------|
|                                          | Antibody           | Company     | Catalog#    | Species | Clone       | Ag Retrieval  | Primary Dilution | Cell Compartment | Used in Figures  |
| 1                                        | AR                 | Dako        | M3562       | mouse   | AR441       | citrate PC    | 500              | nuclear          | Fig. 1-5, S2,S4  |
| 2                                        | CD10               | Vector      | VP-C328     | mouse   | 56C6        | citrate PC    | 20               | cytoplasm        | Fig. 1-5, S2     |
| 3                                        | K 8/18             | Becton/Dick | 349205      | mouse   | cam5.2      | 10' Protease  | 50               | cytoplasm        | Fig. 1-5, S2     |
| 4                                        | K14                | Serotec     | MCA890      | mouse   | n/a         | citrate PC    | 600              | cytoplasm        | Fig. 1-5, S2     |
| 5                                        | K17                | Millipore   | MAB1677     | mouse   | E3          | citrate PC    | 400              | cytoplasm        | Fig. S2          |
| 6                                        | K19                | Dako        | M0888       | mouse   | RCK108      | 10' Protease  | 1000             | cytoplasm        | Fig. 1, S2       |
| 7                                        | K5                 | Lab Vision  | MS-1896     | mouse   | XM26        | citrate pc/mv | 50/30            | cytoplasm        | Fig. 1-5, S2     |
| 8                                        | K5/6               | Chemicon    | MAB1620     | mouse   | D5/16B4     | EDTA PC       | 400              | cytoplasm        | Fig. 5           |
| 9                                        | K7                 | Dako        | M7018       | mouse   | OV-TL 12/30 | 10' Protease  | 1000             | cytoplasm        | Fig. 1-5, S2,3,4 |
| 10                                       | ER                 | NeoMarker   | RM-9101-S   | rabbit  | SP1         | citrate PC    | 100              | nuclear          | Fig. 1-5, S2,3,4 |
| 11                                       | Ki67               | Dako        | M7240       | mouse   | mib1        | citrate pc/mv | 200              | nuclear          | Fig. 1-5, S2,3,4 |
| 12                                       | Muc-1              | Novocastra  | NCL-Muc1    | mouse   | Ma552       | citrate PC    | 600              | cytoplasm        | Fig. S3          |
| 13                                       | NaKATPase          | Epitomics   | 2047-1      | rabbit  | EP1845Y     | citrate PC    | 200              | membrane         | Fig. 3-4         |
| 14                                       | p63                | Dako        | M7247       | mouse   | 4A4         | citrate MV    | 800              | nuclear          | Fig. 4,5         |
| 15                                       | PanK               | Sigma       | C1801       | mouse   | PCK-26      | citrate MV    | 300              | cytoplasm        | Fig. S3          |
| 16                                       | PR                 | Dako        | M3569       | mouse   | PgR636      | citrate PC    | 200              | nuclear          | Fig. 4,5         |
| 17                                       | SMA                | Sigma       | A2547       | mouse   | 1A4         | none          | 20K              | cytoplasm        | Fig. 1-5, S2,3   |
| 18                                       | VDR                | Novus       | NBP1-19     | rabbit  | n/a         | citrate PC    | 200              | nuclear          | Fig. 2-4, S2,S4  |
| 19                                       | VDR                | Santa Cruz  | sc-13133    | Mouse   |             | citrate PC    | 2000             | cyt/nuc          | Fig. 5,6         |
| 20                                       | Vimentin           | Abcam       | ab8069      | mouse   | V9          | citrate PC    | 2000             | cytoplasm        | Fig. 1           |
| 21                                       | AR                 | Millipore   | 06-680      | Rabbit  | N/A         | citrate PC    |                  | nuclear          |                  |
| 22                                       | K5                 | Abcam       | ab75869     | Rabbit  | EPR1600Y    | citrate PC    | 100              | cytoplasm        |                  |
| 23                                       | K7                 | Abcam       | Ab68459     | Rabbit  | EPR1619Y    | citrate PC    | 100              | cytoplasm        |                  |
| 24                                       | K14                | LabVision   | LL025       | Mouse   | MS-620-P    | citrate PC    |                  | cytoplasm        |                  |
| 25                                       | K18                | NeoMarkers  | MS-142      | Mouse   |             | citrate PC    | 200              | cytoplasm        |                  |
| 26                                       | K18                | Abcam       | E431-1      | Rabbit  | Ab32118     | citrate PC    | 100              | cytoplasm        |                  |
| 27                                       | K19                | LabVision   | MS-198-P    | Mouse   |             |               |                  | cytoplasm        |                  |
| 28                                       | Ki67               | Vector Labs | VP-K451     | rabbit  |             | citrate PC    | 2500             | nuclear          |                  |
| 29                                       | Vimentin           | Dako        | M7020       | mouse   | Vim3B4      | 20' protease  | 400              | cytoplasm        |                  |
| Direct Conjugated Antibodies             |                    |             |             |         |             |               |                  |                  |                  |
| 30                                       | CD24-PE            | BD          | 555428      | mouse   | ML5         |               |                  | membrane         |                  |
| 31                                       | CD44-APC           | BD          | 559942      | mouse   | G44-26      |               |                  | membrane         |                  |
| 32                                       | CD133/1-PE         | Miltenyi    | 130-080-801 | mouse   | AC133       |               |                  | membrane         |                  |
| 33                                       | CD326-FITC         | Serotec     | MCA1870FT   | mouse   | VU-ID9      |               |                  | membrane         | Fig. S1          |
| 34                                       | CD326-Cy5.5        | BD          | 347199      | mouse   | EBA-1       |               |                  | membrane         |                  |
| 35                                       | K 8/18 -FITC       | Abcam       | ab54728     | mouse   | cam5.2      |               |                  | cytoplasm        | Fig. S2          |
| 36                                       | ER $\alpha$ -AF488 | Santa Cruz  | sc-542K     | rabbit  | MC-20       |               |                  | nuclear          | Fig. S1          |
| 37                                       | Ki-67-AF488        | Santa Cruz  | sc-7846     | goat    | M-19        |               |                  | nuclear          |                  |
| Secondary Antibodies                     |                    |             |             |         |             |               |                  |                  |                  |
|                                          | Species            | Company     | Catalog #   | Species | Specificity | Conjugate     |                  |                  |                  |
| 1                                        | Rabbit             | Invitrogen  |             | goat    | IgG         | AlexaFluor647 |                  |                  |                  |
| 2                                        | Rabbit             | R&D         | NL004       | donkey  | IgG         | NorthLight557 |                  |                  |                  |
| 3                                        | Mouse              | Invitrogen  |             | goat    | IgG         | AlexaFluor647 |                  |                  |                  |
| 4                                        | Rabbit             | GE          | NA934V      | donkey  | IgG         | HRP           |                  |                  |                  |
| 5                                        | Mouse              | GE          | NXA931      | Sheep   | Ig          | HRP           |                  |                  |                  |
| 6                                        | Mouse              | Jackson     | 115-115-164 | Goat    | IgG         | R-PE          |                  |                  |                  |

The list of antibodies used in this study. The immunostains with twenty antibodies (1-20) are shown in figures 1-5 and S1-5. In order to exclude antibody isoform or clone specific artifacts, staining was repeated with a second antibody from a different clone or manufacturer (antibodies 21-37, data not shown). In all cases, the results with multiple antibodies were consistent.

**Supplemental Table 2: Co-expression frequency of hormone receptors ER, AR and VDR, Keratins 15 and 14, and proliferation marker Ki-67**

Normal human breast FFPE tissue sections were double-stained with the antibodies indicated below. Five representative sections were selected for counting the number of cells that are positive for each antibody alone and positive for both antibodies indicating co-expression. A total of 12,531 cells were counted; the corresponding 98 images showing the areas that were counted are provided in the supplemental data.

|              | Table S2 Image Files      | Number of Cells Counted | Number of Image Files |
|--------------|---------------------------|-------------------------|-----------------------|
| STS2a        | K5 & ER co-expression     | 684                     | 4                     |
| STS2a        | K14 & ER co-expression    | 345                     | 5                     |
| STS2a        | K17 & ER co-expression    | 2,284                   | 5                     |
| STS1b        | ER & Ki67 co-expression   | 1,026                   | 5                     |
| STS1b        | K14 & Ki67 co-expression  | 374                     | 5                     |
| STS1b        | K5 & Ki67 co-expression   | 332                     | 9                     |
| STS1b        | K17 & Ki67 co-expression  | 372                     | 6                     |
| STS1c        | K5 & AR co-expression     | 376                     | 5                     |
| STS1c        | K14 & AR co-expression    | 413                     | 5                     |
| STS1c        | AR & Ki67 co-expression   | 698                     | 5                     |
| STS1c        | ER & AR co-expression     | 429                     | 5                     |
| STS1d        | K5 & VDR co-expression    | 266                     | 5                     |
| STS1d        | AR & VDR co-expression    | 835                     | 8                     |
| STS1d        | ER & VDR co-expression    | 749                     | 6                     |
| STS1d        | VDR & Ki67 co-expression  | 179                     | 5                     |
| STS1e        | CD10 & Ki67 co-expression | 1,084                   | 6                     |
| STS1f        | K14 & K18 co-expression   | 746                     | 4                     |
| STS1f        | K5 & K18 co-expression    | 1,339                   | 5                     |
| <b>Total</b> |                           | <b>12,531</b>           | <b>98</b>             |

In the tables below each row is a different normal breast section stained with the indicated double immunostains (see Supplemental Data p. 30-57 for corresponding images). The total number of cells positive for each marker (column 1-2), both markers (column 3), the percentage of double-positive cells as a fraction of cells positive for each marker (column 4-5) and both markers (column 6) are depicted. Each table shows single and double positive cells as a percent of total. Only luminal cells were counted in these experiments unless otherwise indicated.

**Table S2A: Co-expression frequency of ER, with K5, K14 and K17**

| K5 & ER co-expression |            |            |          | % Overlap |           |            |
|-----------------------|------------|------------|----------|-----------|-----------|------------|
| Cell Counts           | ER         | K5         | [K5+ER]  | % of ER   | % of K5   | % of Total |
| Image 1               | 183        | 103        | 0        | 0%        | 0%        | 0.0%       |
| Image 2               | 97         | 32         | 0        | 0%        | 0%        | 0.0%       |
| Image 3               | 100        | 54         | 0        | 0%        | 0%        | 0.0%       |
| Image 4               | 18         | 97         | 0        | 0%        | 0%        | 0.0%       |
| Image 5               |            |            |          |           |           |            |
| <b>Total</b>          | <b>398</b> | <b>286</b> | <b>0</b> | <b>0%</b> | <b>0%</b> | <b>0%</b>  |

| K14 & ER co-expression |            |            |          | % Overlap   |             |             |
|------------------------|------------|------------|----------|-------------|-------------|-------------|
| Cell Counts            | ER         | K14        | [K14+ER] | % of ER     | % of K14    | % of Total  |
| Image 1                | 61         | 37         | 0        | 0%          | 0%          | 0.0%        |
| Image 2                | 45         | 40         | 1        | 4%          | 5%          | 2.0%        |
| Image 3                | 39         | 33         | 0        | 0%          | 0%          | 0.0%        |
| Image 4                | 35         | 24         | 0        | 3%          | 4%          | 2.0%        |
| Image 5                | 21         | 9          | 0        | 0%          | 0%          | 0.0%        |
| <b>Total</b>           | <b>201</b> | <b>143</b> | <b>1</b> | <b>0.5%</b> | <b>0.7%</b> | <b>0.3%</b> |

| K17 & ER co-expression |             |           |          | % Overlap |           |            |
|------------------------|-------------|-----------|----------|-----------|-----------|------------|
| Cell                   | ER          | K17       | [K17+ER] | % of ER   | % of K17  | % of Total |
| Image 1                | 605         | 12        | 0        | 0%        | 0%        | 0.0%       |
| Image 2                | 629         | 10        | 0        | 0%        | 0%        | 0.0%       |
| Image 3                | 773         | 12        | 0        | 0%        | 0%        | 0.0%       |
| Image 4                | 197         | 11        | 0        | 0%        | 0%        | 0.0%       |
| Image 5                | 29          | 6         | 0        | 0%        | 0%        | 0.0%       |
| <b>Total</b>           | <b>2233</b> | <b>51</b> | <b>0</b> | <b>0%</b> | <b>0%</b> | <b>0%</b>  |

There was no overlap between K5/ER (0.0 %, n=684), K17/ER (0.3%, n= 2286), and a very small overlap between K14/ER (0.3%, n=344). Thus, ER+ luminal cells are essentially mutually exclusive populations with K5/K14/K17 expressing luminal cells.

**Table S2B: Co-expression frequency of Ki67 with ER, K5, K14 and K17**

| ER & Ki67 co-expression |            |            |            | % Overlap   |             |             |
|-------------------------|------------|------------|------------|-------------|-------------|-------------|
| Cell Counts             | ER         | Ki67       | [ER+ Ki67] | % of ER     | % of Ki67   | % of Total  |
| Image 1                 | 46         | 60         | 1          | 2%          | 2%          | 0.9%        |
| Image 2                 | 201        | 56         | 0          | 0%          | 0%          | 0.0%        |
| Image 3                 | 174        | 62         | 0          | 0%          | 0%          | 0.0%        |
| Image 4                 | 374        | 52         | 0          | 0%          | 0%          | 0.0%        |
| Image 5                 |            |            |            |             |             |             |
| <b>Total</b>            | <b>795</b> | <b>230</b> | <b>1</b>   | <b>0.1%</b> | <b>0.4%</b> | <b>0.1%</b> |

| K14 & Ki67 co-expression |            |            |            | % Overlap   |             |             |
|--------------------------|------------|------------|------------|-------------|-------------|-------------|
| Cell Counts              | K14        | Ki67       | [K14+Ki67] | % of K14    | % of Ki67   | % of Total  |
| Image 1                  | 56         | 120        | 0          | 0%          | 0%          | 0.0%        |
| Image 2                  | 28         | 37         | 2          | 7%          | 5%          | 3.1%        |
| Image 3                  | 65         | 23         | 4          | 6%          | 15%         | 4.5%        |
| Image 4                  | 12         | 26         | 0          | 0%          | 0%          | 0.0%        |
| Image 5                  |            |            |            |             |             |             |
| <b>Total</b>             | <b>161</b> | <b>206</b> | <b>7</b>   | <b>4.2%</b> | <b>3.3%</b> | <b>1.9%</b> |

| K5 & Ki67 co-expression |            |            |            | % Overlap   |             |             |
|-------------------------|------------|------------|------------|-------------|-------------|-------------|
| Cell Counts             | K5         | Ki67       | [K5+ Ki67] | % of K5     | % of Ki67   | % of Total  |
| Image 1                 | 46         | 59         | 1          | 2%          | 2%          | 1.0%        |
| Image 2                 | 40         | 61         | 0          | 0%          | 0%          | 0.0%        |
| Image 3                 | 19         | 30         | 0          | 0%          | 0%          | 0.0%        |
| Image 4                 | 56         | 20         | 0          | 0%          | 0%          | 0.0%        |
| Image 5                 |            |            |            |             |             |             |
| <b>Total</b>            | <b>161</b> | <b>170</b> | <b>1</b>   | <b>0.6%</b> | <b>0.6%</b> | <b>0.3%</b> |

| K17 & Ki67 co-expression |            |            |              | % Overlap   |             |             |
|--------------------------|------------|------------|--------------|-------------|-------------|-------------|
| Cell Counts              | K17        | Ki67       | [CD10+ Ki67] | % of K17    | % of Ki67   | % of Total  |
| Image 1                  | 9          | 63         | 0            | 0%          | 0%          | 0.0%        |
| Image 2                  | 4          | 40         | 0            | 0%          | 0%          | 0.0%        |
| Image 3                  | 33         | 12         | 0            | 0%          | 0%          | 0.0%        |
| Image 4                  | 22         | 42         | 0            | 0%          | 0%          | 0.0%        |
| Image 5                  | 118        | 29         | 0            | 0%          | 0%          | 0.0%        |
| <b>Total</b>             | <b>186</b> | <b>186</b> | <b>0</b>     | <b>0.0%</b> | <b>0.0%</b> | <b>0.0%</b> |

The minimal overlap between Ki67/ER (0.1%, n=1026), Ki67/K5 (0.3%, n=332), and Ki67/K17(0%, n=372) suggest that K5+, K17+ or ER+ cells and proliferating (Ki67+) cells are essentially mutually exclusive populations. The K14/Ki67 overlap was slightly higher (1.9 %, n=374).

**Table S2C: Co-expression frequency of AR wit K5, K14, Ki67 and ER**

| K5 & AR co-expression |            |            |          | % Overlap |           |            |
|-----------------------|------------|------------|----------|-----------|-----------|------------|
| Cell Counts           | AR         | K5         | [K5+AR]  | % of AR   | % of K5   | % of Total |
| Image 1               | 144        | 46         | 0        | 0%        | 0%        | 0.0%       |
| Image 2               | 82         | 27         | 0        | 0%        | 0%        | 0.0%       |
| Image 3               | 13         | 15         | 0        | 0%        | 0%        | 0.0%       |
| Image 4               | 22         | 27         | 0        | 0%        | 0%        | 0.0%       |
| Image 5               |            |            |          |           |           |            |
| <b>Total</b>          | <b>261</b> | <b>115</b> | <b>0</b> | <b>0%</b> | <b>0%</b> | <b>0%</b>  |

| K14 & AR co-expression |            |            |           | % Overlap |           |            |
|------------------------|------------|------------|-----------|-----------|-----------|------------|
| Cell Counts            | AR         | K14        | [K14+ AR] | % of AR   | % of K14  | % of Total |
| Image 1                | 20         | 14         | 0         | 0%        | 0%        | 0.0%       |
| Image 2                | 19         | 5          | 0         | 0%        | 0%        | 0.0%       |
| Image 3                | 192        | 26         | 0         | 0%        | 0%        | 0.0%       |
| Image 4                | 58         | 79         | 0         | 0%        | 0%        | 0.0%       |
| Image 5                |            |            |           |           |           |            |
| <b>Total</b>           | <b>289</b> | <b>124</b> | <b>0</b>  | <b>0%</b> | <b>0%</b> | <b>0%</b>  |

| AR & Ki67 co-expression |            |            |            | % Overlap   |             |             |
|-------------------------|------------|------------|------------|-------------|-------------|-------------|
| Cell Counts             | AR         | Ki67       | [AR+ Ki67] | % of AR     | % of K5     | % of Total  |
| Image 1                 | 142        | 47         | 0          | 0%          | 0%          | 0.0%        |
| Image 2                 | 102        | 96         | 1          | 1%          | 1%          | 0.5%        |
| Image 3                 | 48         | 6          | 0          | 0%          | 0%          | 0.0%        |
| Image 4                 | 33         | 17         | 0          | 0%          | 0%          | 0.0%        |
| Image 5                 | 147        | 59         | 0          | 0%          | 0%          | 0.0%        |
| <b>Total</b>            | <b>472</b> | <b>225</b> | <b>1</b>   | <b>0.2%</b> | <b>0.4%</b> | <b>0.1%</b> |

| ER & AR co-expression |            |            |           | % Overlap  |            |              |
|-----------------------|------------|------------|-----------|------------|------------|--------------|
| Cell Counts           | ER         | AR         | [ER+AR]   | % of ER    | % of AR    | % of Total   |
| Image 1               | 73         | 12         | 10        | 12%        | 45%        | 11.8%        |
| Image 2               | 34         | 22         | 14        | 29%        | 39%        | 25.0%        |
| Image 3               | 62         | 56         | 41        | 40%        | 42%        | 34.7%        |
| Image 4               | 47         | 30         | 28        | 37%        | 48%        | 36.4%        |
| Image 5               |            |            |           |            |            |              |
| <b>Total</b>          | <b>216</b> | <b>120</b> | <b>93</b> | <b>30%</b> | <b>44%</b> | <b>27.7%</b> |

There was very little overlap between AR/K5 (0 %, n=376), AR/Ki67 (0.1%, n=738), AR/K14 (0%, n=413). In contrast, on average 44% of the AR+ were also ER+ positive (n= 429).



**Table S2D: Co-expression frequency of VDR with K15, AR, ER and Ki-67**

| K5 & VDR co-expression |            |            |           | % Overlap  |            |              |
|------------------------|------------|------------|-----------|------------|------------|--------------|
| Cell Counts            | VDR        | K5         | [K5+VDR]  | % of VDR   | % of K5    | % of Total   |
| Image 1                | 35         | 20         | 6         | 15%        | 23%        | 10.9%        |
| Image 2                | 41         | 14         | 7         | 15%        | 33%        | 12.7%        |
| Image 3                | 28         | 7          | 2         | 7%         | 22%        | 5.7%         |
| Image 4                | 16         | 28         | 4         | 20%        | 13%        | 9.1%         |
| Image 5                | 17         | 35         | 6         | 26%        | 15%        | 11.5%        |
| <b>Total</b>           | <b>137</b> | <b>104</b> | <b>25</b> | <b>15%</b> | <b>19%</b> | <b>10.4%</b> |

| VDR & Ki67 co-expression |            |           |             | % Overlap   |             |             |
|--------------------------|------------|-----------|-------------|-------------|-------------|-------------|
| Cell Counts              | VDR        | Ki67      | [VDR+ Ki67] | % of VDR    | % of K5     | % of Total  |
| Image 1                  | 43         | 9         | 0           | 0%          | 0%          | 0.0%        |
| Image 2                  | 47         | 2         | 0           | 0%          | 0%          | 0.0%        |
| Image 3                  | 10         | 8         | 0           | 0%          | 0%          | 0.0%        |
| Image 4                  | 11         | 21        | 0           | 0%          | 0%          | 0.0%        |
| Image 5                  | 24         | 4         | 0           | 0%          | 0%          | 0.0%        |
| <b>Total</b>             | <b>135</b> | <b>44</b> | <b>0</b>    | <b>0.0%</b> | <b>0.0%</b> | <b>0.0%</b> |

| AR & VDR co-expression |            |            |           | % Overlap  |           |             |
|------------------------|------------|------------|-----------|------------|-----------|-------------|
| Cell Counts            | AR         | VDR        | [AR+VDR]  | % of AR    | % of VDR  | % of Total  |
| Image 1                | 41         | 171        | 22        | 35%        | 11%       | 10.4%       |
| Image 2                | 58         | 116        | 11        | 16%        | 9%        | 6.3%        |
| Image 3                | 15         | 91         | 9         | 38%        | 9%        | 8.5%        |
| Image 4                | 25         | 276        | 13        | 34%        | 4%        | 4.3%        |
| Image 5                |            |            |           |            |           |             |
| <b>Total</b>           | <b>139</b> | <b>654</b> | <b>42</b> | <b>23%</b> | <b>6%</b> | <b>5.3%</b> |

| ER & VDR co-expression |            |            |           | % Overlap  |            |             |
|------------------------|------------|------------|-----------|------------|------------|-------------|
| Cell Counts            | ER         | VDR        | [ER+VDR]  | % of ER    | % of VDR   | % of Total  |
| Image 1                | 7          | 166        | 20        | 74%        | 11%        | 11.6%       |
| Image 2                | 65         | 152        | 24        | 27%        | 14%        | 11.1%       |
| Image 3                | 41         | 87         | 17        | 29%        | 16%        | 13.3%       |
| Image 4                | 70         | 100        | 20        | 22%        | 17%        | 11.8%       |
| Image 5                |            |            |           |            |            |             |
| <b>Total</b>           | <b>183</b> | <b>505</b> | <b>61</b> | <b>25%</b> | <b>11%</b> | <b>8.9%</b> |

There was some overlap between VDR/K5 (10.4 %, n=266). On average 23% of AR+ cells were also VDR+ (n=835), and 25% of ER+ cells were VDR+ (n=749), but there was almost no overlap between VDR/Ki67 (0%, n=179).

**Table S2E: Co-expression frequency of CD10 and Ki67**

| CD10 & Ki67 co-expression |            |            |              | % Overlap   |             |             |
|---------------------------|------------|------------|--------------|-------------|-------------|-------------|
| Cell Counts               | CD10       | Ki67       | [CD10+ Ki67] | % of CD10   | % of Ki67   | % of Total  |
| Image 3                   | 36         | 56         | 4            | 10%         | 7%          | 4.3%        |
| Image 2                   | 93         | 115        | 0            | 0%          | 0%          | 0.0%        |
| Image 3                   | 55         | 111        | 0            | 0%          | 0%          | 0.0%        |
| Image 4                   | 191        | 209        | 2            | 1%          | 1%          | 0.5%        |
| Image 5                   | 90         | 123        | 3            | 3%          | 2%          | 1.4%        |
| <b>Total</b>              | <b>465</b> | <b>614</b> | <b>5</b>     | <b>1.1%</b> | <b>0.8%</b> | <b>0.5%</b> |

Most of the proliferating cells were in the luminal layer; only 0.5% of the CD10+ myoepithelial cells were also positive for proliferation marker Ki67 (n=1084).

**Table S2F: Co-expression frequency of K14 and K5 with K18**

| K14 & K18 co-expression |            |            |            | % Overlap  |             |              |
|-------------------------|------------|------------|------------|------------|-------------|--------------|
| Cell Counts             | K18        | K14        | [K18+K14]  | % of K18   | % of K14    | % of Total   |
| Image 1                 | 70         | 14         | 14         | 17%        | 100%        | 16.7%        |
| Image 2                 | 71         | 47         | 47         | 40%        | 100%        | 39.8%        |
| Image 3                 | 104        | 94         | 94         | 47%        | 100%        | 47.5%        |
| Image 4                 | 109        | 41         | 41         | 27%        | 100%        | 27.3%        |
| Image 5                 |            |            |            |            |             |              |
| <b>Total</b>            | <b>354</b> | <b>196</b> | <b>196</b> | <b>36%</b> | <b>100%</b> | <b>35.6%</b> |

| K5 & K18 co-expression |            |            |            | % Overlap  |            |              |
|------------------------|------------|------------|------------|------------|------------|--------------|
| Cell Counts            | K18        | K5         | [K18+ K5]  | % of K18   | % of K5    | % of Total   |
| Image 1                | 217        | 65         | 65         | 23%        | 100%       | 23.0%        |
| Image 2                | 120        | 38         | 38         | 24%        | 100%       | 24.1%        |
| Image 3                | 215        | 60         | 60         | 22%        | 100%       | 21.8%        |
| Image 4                | 114        | 33         | 33         | 22%        | 100%       | 22.4%        |
| Image 5                | 213        | 101        | 101        | 32%        | 100%       | 32.2%        |
| <b>Total</b>           | <b>879</b> | <b>297</b> | <b>163</b> | <b>16%</b> | <b>55%</b> | <b>13.9%</b> |

On average 36% of K18+ cells were also K14+ (n=746), and 16% of K18+ cells were also K5+ (n=1339). In contrast, 100% of the luminal K5+ or K14+ cells were also K18+.

**Supplemental Table 3**

**Table demonstrating normal cell counterparts corresponding to breast tumor phenotypes.**

|            | Normal Cellular States  |    |    |     |                  |                    |                    | Breast Tumors |       |      |
|------------|-------------------------|----|----|-----|------------------|--------------------|--------------------|---------------|-------|------|
|            | Luminal Cellular States | ER | AR | VDR | K5<br>K14<br>K17 | K7<br>K18<br>Cld-4 | SMA<br>CD10<br>p63 | ER+           | HER2+ | TNBC |
| <b>HR0</b> | <i>L1-2</i>             |    |    |     |                  | +                  |                    |               | +     | +    |
|            | <i>L3</i>               |    |    |     | +                | +                  |                    |               |       | +    |
| <b>HR1</b> | <i>L4</i>               | +  |    |     |                  | +                  |                    | +             | +     |      |
|            | <i>L5</i>               |    | +  |     |                  | +                  |                    |               | +     | +    |
|            | <i>L6</i>               |    |    | +   |                  | +                  |                    |               | +     | +    |
|            | <i>L7</i>               |    |    | +   | +                | +                  |                    |               | +     | +    |
| <b>HR2</b> | <i>L8</i>               | +  | +  |     |                  | +                  |                    | +             | +     |      |
|            | <i>L9</i>               | +  |    | +   |                  | +                  |                    | +             | +     |      |
|            | <i>L10</i>              |    | +  | +   |                  | +                  |                    |               | +     | +    |
| <b>HR3</b> | <i>L11</i>              | +  | +  | +   |                  | +                  |                    | +             | +     |      |

## Supplemental Table 4

Normal human breast luminal and myoepithelial cells were previously purified and profiled for mRNA expression by three different groups (10, 20, 21). Grigoriadis *et al.* used double immuno-magnetic sorting methods (ESA/CD10) and identified 907 luminal and 955 myoepithelial transcripts in cells directly isolated from freshly dissociated normal breast tissue. Using the same approach and markers, Jones *et al.* identified 132 myoepithelial and 77 luminal specific genes. Raouf *et al.*, used CD10/Thy1 (myoepithelial) and CD133/Muc1 (luminal) to isolate cells (10, 20, 21). We compared the cell type specific mRNAs identified in each study and identified 131 Luminal specific mRNAs that were cell type specific in all three data sets(A) and 90 myoepithelial specific mRNAs that were detected all three of these studies (B). This consensus signature was used to examine the expression of these genes in basal-like and non-basal-like human breast tumors in SF6 (12-14, 22).

**Supplemental Table 4A**  
**Consensus Normal Luminal mRNA Signature**

|    | hgnc_symbol | Affymetrix   |    | hgnc_symbol | Affymetrix   |    | hgnc_symbol | Affymetrix   |     | hgnc_symbol | Affymetrix   |
|----|-------------|--------------|----|-------------|--------------|----|-------------|--------------|-----|-------------|--------------|
| 1  | PRSS8       | 202525_at    | 34 | NTN4        | 223315_at    | 67 | ARHGDI1     | 1555812_a_at | 100 | RNF141      | 226106_at    |
| 2  | SLC9A3R1    | 201349_at    | 35 | ENC1        | 201340_s_at  | 68 | GSTTP1      | 203815_at    | 101 | HEBP2       | 203430_at    |
| 3  | SLC44A2     | 224609_at    | 36 | C4orf19     | 219450_at    | 69 | PGRMC2      | 213227_at    | 102 | BAIAP2L1    | 227371_at    |
| 4  | RARRES3     | 204070_at    | 37 | TNFRSF21    | 214581_x_at  | 70 | CGNL1       | 225817_at    | 103 | VASN        | 225867_at    |
| 5  | LCN2        | 212531_at    | 38 | ISG15       | 205483_s_at  | 71 | SEC23A      | 204344_s_at  | 104 | LYPLA1      | 203007_x_at  |
| 6  | TNFAIP2     | 202510_s_at  | 39 | LY6D        | 206276_at    | 72 |             | 40837_at     | 105 | KRT81       | 213711_at    |
| 7  | CX3CL1      | 823_at       | 40 | ALDH1A3     | 203180_at    | 73 | KRT23       | 218963_s_at  | 106 | REEP6       | 226597_at    |
| 8  | CX3CL1      | 203687_at    | 41 | GATSL3      | 233528_s_at  | 74 | C9orf16     | 204480_s_at  | 107 | KLF6        | 208961_s_at  |
| 9  | IL32        | 203828_s_at  | 42 | C1orf198    | 223063_at    | 75 | CTGF        | 209101_at    | 108 | SCCPDH      | 201825_s_at  |
| 10 | SEMA3B      | 203071_at    | 43 | ELF3        | 229842_at    | 76 | DEFB1       | 210397_at    | 109 | NEK6        | 223158_s_at  |
| 11 | ERBB3       | 202454_s_at  | 44 | MYEF2       | 222771_s_at  | 77 | PVRL2       | 232079_s_at  | 110 | CLIC3       | 219529_at    |
| 12 | ERBB3       | 1563253_s_at | 45 | WWC1        | 216074_x_at  | 78 | QPCT        | 205174_s_at  | 111 | PIM1        | 209193_at    |
| 13 | ERBB3       | 226213_at    | 46 | PSEN1       | 238816_at    | 79 | HADH        | 211569_s_at  | 112 | NFKBIA      | 201502_s_at  |
| 14 | FSTL3       | 203592_s_at  | 47 | RAB11FIP1   | 225177_at    | 80 | TMC4        | 226403_at    | 113 | CMPK1       | 222448_s_at  |
| 15 | MGLL        | 211026_s_at  | 48 | CLDN3       | 203953_s_at  | 81 | NT5DC2      | 218051_s_at  | 114 | RTP4        | 219684_at    |
| 16 | GADD45B     | 209305_s_at  | 49 | PTGES       | 207388_s_at  | 82 | APLP2       | 208702_x_at  | 115 | NPAS2       | 205460_at    |
| 17 | CHKA        | 204266_s_at  | 50 | ZFYVE21     | 219929_s_at  | 83 | MUC20       | 226622_at    | 116 | DYNLT1      | 201999_s_at  |
| 18 | SLC44A2     | 225175_s_at  | 51 | PRSS27      | 232074_at    | 84 | TAF10       | 200055_at    | 117 |             | 229648_at    |
| 19 | LGALS3      | 208949_s_at  | 52 | TM7SF2      | 210130_s_at  | 85 | TFCP2L1     | 227642_at    | 118 | SLC25A37    | 222528_s_at  |
| 20 | PPAP2C      | 209529_at    | 53 | NR2F2       | 215073_s_at  | 86 | RTCD1       | 203594_at    | 119 | FAM84B      | 225864_at    |
| 21 | ATP1B1      | 201242_s_at  | 54 | RPS27L      | 218007_s_at  | 87 | NME4        | 212739_s_at  | 120 | DDAH1       | 209094_at    |
| 22 | MF12        | 223723_at    | 55 | MGAT4A      | 231283_at    | 88 | GRAMD3      | 218706_s_at  | 121 | SUMO3       | 200740_s_at  |
| 23 | KLK6        | 204733_at    | 56 | CLDN4       | 201428_at    | 89 | WSB2        | 201760_s_at  | 122 | VTCN1       | 219768_at    |
| 24 | BACE2       | 217867_x_at  | 57 | NEBL        | 207279_s_at  | 90 | FAM62B      | 1555829_at   | 123 | RASAL1      | 219752_at    |
| 25 | TNFAIP2     | 202509_s_at  | 58 | IFT172      | 226324_s_at  | 91 | CGN         | 223232_s_at  | 124 | C5orf32     | 224707_at    |
| 26 | CALML5      | 220414_at    | 59 | ALDH1B1     | 209645_s_at  | 92 | ERF1        | 224657_at    | 125 | PROM2       | 1562378_s_at |
| 27 | CDA         | 205627_at    | 60 | PACSL1      | 1554691_a_at | 93 | STEAP4      | 225987_at    | 126 | TMEM45A     | 219410_at    |
| 28 | EMP1        | 234233_s_at  | 61 | MCFD2       | 212246_at    | 94 | GDE1        | 202593_s_at  | 127 | TSPAN14     | 221002_s_at  |
| 29 | GLIPR2      | 225604_s_at  | 62 | CNN3        | 201445_at    | 95 | RRAS        | 212647_at    | 128 | IRAK2       | 231779_at    |
| 30 | EZR         | 208621_s_at  | 63 | PCBD1       | 203557_s_at  | 96 | RIN3        | 60471_at     | 129 | MLLT4       | 224685_at    |
| 31 | GARNL4      | 213280_at    | 64 | LXN         | 218729_at    | 97 | CDCP1       | 1554110_at   | 130 | VKORC1L1    | 224881_at    |
| 32 | GPRC5A      | 235563_at    | 65 | RARRES1     | 206391_at    | 98 | SLC12A7     | 218066_at    | 131 | ZNF84       | 228630_at    |
| 33 | TSPAN13     | 217979_at    | 66 | CSGALNACT1  | 219049_at    | 99 | CD99        | 201028_s_at  |     |             |              |

**Supplemental Table 4B**  
**Consensus Normal Myoepithelial mRNA Signature**

| hgnc_symbol | Affymetrix ID |  | hgnc_symbol | Affymetrix ID   |             | hgnc_symbol | Affymetrix ID |              |
|-------------|---------------|--|-------------|-----------------|-------------|-------------|---------------|--------------|
| TIMP3       | 201147_s_at   |  | 34          | ACTG2           | 202274_at   | 67          | FAM176A       | 227828_s_at  |
| TIMP1       | 201666_at     |  | 35          | SERPINF1        | 202283_at   | 68          | DUSP2         | 204794_at    |
| CAV1        | 212097_at     |  | 36          | CXCL14          | 222484_s_at | 69          | FEZ1          | 203562_at    |
| TRIM29      | 202504_at     |  | 37          | GJA1            | 201667_at   | 70          | MRC2          | 37408_at     |
| MMP3        | 205828_at     |  | 38          | CCDC8           | 223496_s_at | 71          | RCBTB2        | 230292_at    |
| DST         | 204455_at     |  | 39          | VSNL1           | 203798_s_at | 72          | USP31         | 1558117_s_at |
| HTRA1       | 201185_at     |  | 40          | MMP1            | 204475_at   | 73          | CROT          | 204573_at    |
| MYLK        | 202555_s_at   |  | 41          | IGFBP2          | 202718_at   | 74          | SQSTM1        | 201471_s_at  |
| TP63        | 211194_s_at   |  | 42          | CTHRC1          | 225681_at   | 75          | COL6A1        | 213428_s_at  |
| TP63        | 209863_s_at   |  | 43          | IRX4            | 220225_at   | 76          | PPP1R14A      | 227006_at    |
| TP63        | 211195_s_at   |  | 44          | CCDC3           | 223316_at   | 77          | TBC1D2        | 222173_s_at  |
| TP63        | 211834_s_at   |  | 45          | LIMA1           | 217892_s_at | 78          | ARMCX1        | 218694_at    |
| TP63        | 207382_at     |  | 46          | TCF4            | 212386_at   | 79          | SSBP2         | 203787_at    |
| PTHLH       | 210355_at     |  | 47          | SLC7A5,SLC7A5P1 | 201195_s_at | 80          | VIM           | 201426_s_at  |
| ITGA6       | 201656_at     |  | 48          | S100A2          | 204268_at   | 81          |               | 226148_at    |
| TIMP3       | 201149_s_at   |  | 49          | TMTC1           | 224397_s_at | 82          | EPAS1         | 200878_at    |
| TIMP3       | 201148_s_at   |  | 50          | SLC38A1         | 224579_at   | 83          | POLE3         | 208828_at    |
| TIMP3       | 201150_s_at   |  | 51          | TPM2            | 204083_s_at | 84          | AKAP1         | 201674_s_at  |
| JAG1        | 216268_s_at   |  | 52          | JAM3            | 212813_at   | 85          | NQO2          | 203814_s_at  |
| SLC1A5      | 208916_at     |  | 53          | SPARCL1         | 200795_at   | 86          | DUSP11        | 202703_at    |
| CAV1        | 203065_s_at   |  | 54          | SGCE            | 204688_at   | 87          | PPPDE1        | 212371_at    |
| COL1A1      | 202310_s_at   |  | 55          | GPX2            | 202831_at   | 88          | MCAM          | 211340_s_at  |
| CTSC        | 225647_s_at   |  | 56          | ANO1            | 218804_at   | 89          | CTNNAL1       | 202468_s_at  |
| CTSC        | 225646_at     |  | 57          | CCND2           | 200953_s_at | 90          | SERPINH1      | 207714_s_at  |
| SPARC       | 212667_at     |  | 58          | SRPX            | 204955_at   |             |               |              |
| TRIM29      | 211002_s_at   |  | 59          | CNN1            | 203951_at   |             |               |              |
| TRIM29      | 211001_at     |  | 60          | BOC             | 225990_at   |             |               |              |
| DST         | 216918_s_at   |  | 61          | ANTXR1          | 224694_at   |             |               |              |
| SPRR1A      | 213796_at     |  | 62          | KRT14           | 209351_at   |             |               |              |
| SFN         | 209260_at     |  | 63          | THY1            | 213869_x_at |             |               |              |
| SFN         | 33322_i_at    |  | 64          | NNMT            | 202237_at   |             |               |              |
| SFN         | 33323_r_at    |  | 65          | COL9A3          | 204724_s_at |             |               |              |
| COL3A1      | 215076_s_at   |  | 66          | AEBP1           | 201792_at   |             |               |              |

### Supplemental Table 5

#### Means and frequencies of participants' characteristics by cross-classified ER/AR/VDR status (N=1731), Nurses' Health Study (1976-1996)

| Characteristic                        | HR3          | HR2        | HR1        | HR0         |
|---------------------------------------|--------------|------------|------------|-------------|
| N (%)                                 | 1006 (58.1)  | 429 (24.8) | 185 (10.7) | 111 (6.4)   |
| Age at diagnosis, mean (N), yr        | 57.6 (1006)  | 57.3 (429) | 55.6 (185) | 54.7 (111)  |
| Menopausal status at diagnosis, N*(%) |              |            |            |             |
| Premenopausal                         | 224 (22.6)   | 94 (22.4)  | 35 (19.7)  | 28 (25.7)   |
| Postmenopausal                        | 767 (77.4)   | 326 (77.6) | 143 (80.3) | 81 (74.3)   |
| ER status, N* (%)                     |              |            |            |             |
| Positive                              | 1006 (100.0) | 328 (76.5) | 22 (11.9)  | 0 (0.0)     |
| Negative                              | 0 (0.0)      | 101 (23.5) | 163 (88.1) | 111 (100.0) |
| HER2 status, N* (%)                   |              |            |            |             |
| Positive                              | 52 (5.2)     | 77 (18.2)  | 39 (21.2)  | 9 (8.2)     |
| Negative                              | 946 (94.8)   | 347 (81.8) | 145 (78.8) | 101 (91.8)  |
| Nodal involvement, N (%)              |              |            |            |             |
| None                                  | 686 (68.2)   | 279 (65.0) | 99 (53.5)  | 69 (62.2)   |
| 1 - 3                                 | 194 (19.3)   | 83 (19.4)  | 50 (27.0)  | 25 (22.5)   |
| 4 - 9                                 | 84 (8.4)     | 36 (8.4)   | 21 (11.4)  | 12 (10.8)   |
| ≥10                                   | 42 (4.2)     | 31 (7.2)   | 15 (8.1)   | 5 (4.5)     |
| Tumor size (cm), N (%)                |              |            |            |             |
| ≤2                                    | 692 (68.8)   | 260 (60.6) | 100 (54.1) | 58 (52.3)   |
| > 2                                   | 314 (31.2)   | 169 (39.4) | 85 (46.0)  | 53 (47.8)   |
| Histological grade, N* (%)            |              |            |            |             |
| I (low)                               | 252 (25.3)   | 62 (14.7)  | 10 (5.5)   | 2 (1.8)     |
| II (intermediate)                     | 632 (63.4)   | 234 (55.6) | 82 (45.3)  | 15 (13.5)   |
| III (high)                            | 113 (11.3)   | 125 (29.7) | 89 (49.2)  | 94 (84.7)   |
| Stage†, N (%)                         |              |            |            |             |
| I                                     | 529 (52.6)   | 205 (47.8) | 66 (35.7)  | 44 (39.6)   |
| II                                    | 326 (32.4)   | 149 (34.7) | 76 (41.1)  | 47 (42.3)   |
| III                                   | 151 (15.0)   | 75 (17.5)  | 43 (23.2)  | 43 (23.2)   |
| Chemotherapy, N* (%)                  |              |            |            |             |
| Yes                                   | 260 (34.4)   | 146 (47.0) | 81 (64.8)  | 51 (65.4)   |
| No                                    | 495 (65.6)   | 165 (53.1) | 44 (35.2)  | 27 (34.6)   |
| Hormone treatment, N* (%)             |              |            |            |             |
| Yes                                   | 556 (73.3)   | 211 (69.0) | 47 (38.5)  | 28 (36.8)   |
| No                                    | 203 (26.8)   | 95 (31.1)  | 75 (61.5)  | 48 (63.2)   |
| Radiation treatment, N* (%)           |              |            |            |             |
| Yes                                   | 337 (44.2)   | 128 (41.4) | 60 (48.4)  | 34 (44.2)   |
| No                                    | 426 (55.8)   | 181 (58.6) | 64 (51.6)  | 43 (55.8)   |

\*N doesn't add to total because of missing information.

†Stage I=tumor size≤2cm and no nodal involvement;

II=tumor size≤2cm & 1-3 nodes or 2-4cm & 0-3 nodes or 4+cm & 0 nodes;

III=tumor size≤2cm & 4+ nodes or 2-4cm & 4+ nodes or >4cm & 1+ nodes.

**Supplemental Table 6****Multivariate analysis of breast cancer-specific mortality by HR status**

(HR0, HR1, HR2 and HR3); Hazard ratio and 95%CI for breast cancer specific mortality in the Nurses' Health Study by time since diagnosis

|     | Overall                    | <5 years                   |                            | 5+ years                   |                            |
|-----|----------------------------|----------------------------|----------------------------|----------------------------|----------------------------|
|     | HR<br>(95%CI) <sup>2</sup> | HR<br>(95%CI) <sup>1</sup> | HR<br>(95%CI) <sup>2</sup> | HR<br>(95%CI) <sup>1</sup> | HR<br>(95%CI) <sup>2</sup> |
| HR3 | 1.0 (REF)                  |
| HR2 | 2.9<br>(1.60-5.21)         | 2.26<br>(1.55-3.28)        | 1.69<br>(1.14-2.50)        | 1.20<br>(0.99-1.58)        | 1.24<br>(0.93-1.66)        |
| HR1 | 5.3<br>(2.77-9.97)         | 3.74<br>(2.47-5.66)        | 2.44<br>(1.56-3.84)        | 1.14<br>(0.77-1.70)        | 1.25<br>(0.81-1.93)        |
| HR0 | 6.9<br>(3.37-14.39)        | 3.57<br>(2.17-5.85)        | 2.71<br>(1.56-4.71)        | 0.28<br>(0.12-0.69)        | 0.34<br>(0.13-0.86)        |

1-age adjusted

2-adjusted for age, year of diagnosis, HER2 status, disease stage, grade, radiation treatment, chemotherapy and hormonal treatment

## **SUPPLEMENTARY MATERIALS AND METHODS**

### **Author contributions**

TAI (hypothesis, concepts and project supervision), TAI and SS (experimental design), TAI, SS, AE and GM (multiplex marker analysis), SS, RH and RMT (epidemiological and statistical analysis), SS, CH, MS and AC (bioinformatic analysis), TAI, BW and AT (cell line analysis), TW (immunostains), SS, DK, and TAI (histopathologic analysis), AR and SJS (tissue microarrays), SS and TAI wrote the paper.

### **Tissue samples**

Paraffin blocks from surgical resection specimens of normal breast tissue and of breast tumors were obtained from the archives of Brigham and Women's Hospital (BWH) in accordance with the regulations for excess tissue use stipulated by the BWH institutional review board. The study was conducted according to the principles outlined in the Declaration of Helsinki. A tissue microarray (TMA) of triple negative tumors (HTMA114) was previously described (15). TMAs BRC1501 and BRC1502 were purchased from Pantomics (Richmond, Ca). HER2 positive tumors were defined by IHC (expression >6 on scoring scale described below). A TMA of normal breast tissue (mean age 34.6 years old, range 18-56 years old) (23) and TMAs of samples from the Nurses' Health Study were previously described (24). We thank the participants and staff of the NHS cohort for their valuable contributions. We thank the following state cancer registries for their help: AL, AZ, AR, CA, CO, CT, DE, FL, GA, ID, IL, IN, IA, KY, LA, ME, MD, MA, MI, NE, NH, NJ, NY, NC, ND, OH, OK, OR, PA, RI, SC, TN, TX, VA, WA, and WY. We thank Terri Woo for expert assistance with IHC.

### **Immunohistochemistry and immunofluorescence of tissues**

Deparaffinized sections were blocked with 3% H<sub>2</sub>O<sub>2</sub>, antigen retrieval was performed using a pressure cooker with Dako citrate buffer (pH 6.0) at 120 °C +/- 2 °C, 15 +/- 5 PSI, slides were blocked with 3% serum and incubated with primary antibody (indicated dilutions in Table X) at room temperature for 40 minutes. Primary antibody application was followed by 30 minute incubation with Dako Labeled Polymer-HRP as a secondary antibody, and visualized with 3, 3' - diaminobenzidine (DAB) as a chromogen (Dako Envision+ System). Mayer-hematoxylin was the counterstain. Immunostained sections were reviewed by light microscopy and scored visually with a value assigned to each individual core.

Immunofluorescence was performed using similar conditions but with fluorescence labeled secondary antibodies conjugated with fluorescein isothiocyanate (FITC), Texas Red, Cy3, Cy5, or AlexaFluor dyes, and reviewed by standard fluorescence microscope.



In Figure 4, immunostained sections were scored independently by three pathologists (TAI, DK and SS) using light microscopy and a 0 to 25 scale. The percent of tumor cells staining was quantified as (0) = 0%, (1+) = 1-20%, (2+) = 21-40%, (3+) = 41-60%, (4+) = 61-80%, and (5+) = 81-100%. The intensity of staining was quantified 0 to 5. The total score was calculated by multiplying the percent score with the intensity score. See supplemental table 3 for scores.

In figure 5 (Nurses' Health Study) there were four cores for each of the 1,731 patients (6,924 cores in total). These TMAs were stained with ER, PR, HER2, VDR, AR, [K8/18/Cld-4], K5/6, and [SMA/p63/CD10] antibodies and scored semi-quantitatively. Given the enormous number of cores to be scored ( $1,731 \times 4 \times 8 = 55,392$ ) and the bimodal expression pattern observed in pilot studies (Figure 4) we proceeded with a binomial scoring system with a 1% cut off point in this study. Scoring was 0 for no staining (<1%), 1 for positive staining. The pathologists were blinded to the scores given by the other pathologist and to survival outcomes. Scoring averages were determined per case using values assigned to all interpretable cores from the two pathology readings. If diagnostic tissue was absent or if the staining was not interpretable for all three cores, the case status was recorded as missing. ER, PR and HER2 status of each case was as previously described (25).

### **Analysis of multiplex immunofluorescence**

It has been very difficult to immunostain FFPE tissue sections with more than 3 different antibodies simultaneously for several reasons that involves limitations due to cross channel fluorescence of conjugates, incompatibility of primary antibody hybridization conditions and species limitation of secondary antibodies (26-28).

(1) While the excitation and emission wavelengths for fluorescence conjugates such as fluorescein isothiocyanate (FITC), rhodamine, Texas Red, Cy3, Cy5, and AlexaFluor dyes are theoretically non-overlapping, bleed through between channels is not uncommon. Thus simultaneous multiplexing requires use fluorescence conjugates with very different excitation and emission wavelengths, which limits the number of fluorescent probes that can be simultaneously used to 3 or 4, for all practical purposes.

(2) Primary hybridization of tissues with single primary antibodies vs. with 3-4 different antibodies does not always produce the same results. This is because in some cases the antigen retrieval conditions are different for each antibody or optimum hybridization conditions may require different temperature or time. Thus one may have to use conditions that would work for all the antibodies simultaneously, which is many times is suboptimal for some of the antibodies if not all (29).

(3) Most secondary antibody selectivity is species based, which also limits the number of secondary antibodies that can be multiplexed simultaneously, since most well characterized primary antibodies are produced in mouse, rabbit, rat or chicken. Thus, for all intents and purposes these put an upper limit to simultaneous multiplexing.

To solve these problems we used a sequential multiplex immunofluorescence method developed at GE Global Research Center (Niskayuna, NY) where two antibodies are hybridized to the tissue section at a time and images are collected with two laser exciting the tissue in two channels. Thus, this approach allows using the optimum antigen retrieval and hybridization conditions for each antibody and there is ostensibly no cross channel bleed-through of fluorescence (30). Briefly, IF-based sequential multiplexing method requires direct conjugation of primary antibodies with either Cy3 or Cy5 dye. Tissue sections were sequentially stained with two primary antibodies labeled with Cy3 and Cy5 for each round of staining, images were then acquired and then the fluorescent labels were inactivated. Another round of staining was then performed with another two Cy3 and Cy5 labeled antibodies. This process was repeated until all antibodies of interest were stained and images acquired. For this study, total of 12 antibodies were multiplexed on the same tissue section. For more information about this multiplex staining system see (31) and [http://www.pathinformatics.pitt.edu/sites/default/files/pathinfo/content/Gerdes-Rittscher-PathInfo\\_HIMA-2011.pdf](http://www.pathinformatics.pitt.edu/sites/default/files/pathinfo/content/Gerdes-Rittscher-PathInfo_HIMA-2011.pdf) or <http://www.gehealthcare.com/euen/oncology/esmo/pdf/How-MT-PI-can-work-together.pdf>

Image analysis was performed with MetaMorph 7.7 (Molecular Devices, Downingtown, PA). The results of the analysis of luminal epithelial cells are reported. The DAPI image was used to generate a nuclear mask image. A DAPI intensity threshold was set to identify all cell nuclei, and cut/join tools were used to outline each nucleus. Next, keratin negative areas were masked out to eliminate signals from stromal cells and the SMA image was used to mask myoepithelial cells. Integrated Morphometry Analysis / Measure Objects (IMA/MO) was used with minimum object area of 70 pixels to eliminate objects too small to be complete cell nuclei. The resulting Measured Objects image was binarized to generate a nuclear mask. The nuclear mask image was binarized, then dilated (neighborhood 2, repeat count 5, dilate without closing) to generate a binary cell mask image. The binary cell mask image was then applied to all eleven image planes using Arithmetic: source channels image stack and binary cell mask. The resulting image had the starting intensity values for every pixel the mask image was 'on', zero value for every pixel the mask image was 'off'.

To ensure that every object appeared in every channel, we converted the MetaMorph binary cell mask image to a conventional 16-bit image with values 1 (where binary was 'on') and 0 (where binary was 'off'). This image was then added to each of the image

channels, which resulted in equal minimum possible intensity value for each channel-object in each plane, and all image planes had identical objects. Next the data was exported to Microsoft Excel with threshold to outputs for object area and intensity (1 to 65,535). To facilitate analysis of double (HR2) and triple (HR3) hormone receptor positive cells, we used MetaMorph to generate images featuring HR2 and HR3 cells. Starting with the eleven plane image stacks of separated cell objects, we duplicated the stack, used Keep Planes command to keep the image plane channels of interest – ER, AR, VDR (nuclear) – and used Stack Arithmetic Average, to generate an image, “HR2” or “HR3”, with bright nuclear signal if any of the ER, AR or VDR (nuclear) signals were high. For display purposes, we also found useful to perform Color Combine on some image triplets, ex. Red=ER, Green=AR, Blue=DAPI.

### **Nurses’ Health Study: design and population**

The NHS is a prospective cohort study initiated in 1976: 121,700 female US-registered nurses between the ages of 30 and 55 years completed a questionnaire covering factors relevant to women’s health with biennial follow-up questionnaires used to update exposure information and ascertain nonfatal incident diseases. Information about the cohort, selection criteria for outcome analysis, covariates evaluated, and the statistical analysis methods are as previously described (24).

### **Analysis of mRNA expression profiles**

Kaplan-Meier analysis of relapse free survival for all invasive breast cancers from the 855 patient breast tumor dataset (16) (<https://genome.unc.edu/>) was performed by first independently rank ordering all 855 tumors according to gene expression values for ER, AR, and VDR. Next, tumors were classified as ‘Positive/High’ or ‘Negative/Low’ for each gene, independent of each other using a 50th percentile cut off. The groups were then assembled based on positive or negative call for each gene; all negative=HR0, one positive=HR1+, two positive=HR2+, all three positive=HR3+.

### **Characterization of breast cancer cell lines**

All the ATCC cells lines we used were authenticated using short tandem repeat (STR) analysis of specific loci and the cell line identity was confirmed. All cell lines were cultured according to ATCC’s guidelines. BT20, HCC1187, MDAMB468 and SUM159 cells were trypsinized with 0.05% trypsin/EDTA and plated at appropriate densities (BT20: 6,000, HCC1187: 10,000, MDAMB468: 4,000 and SUM159: 1,000 cells/well) in 96 well plates in DMEM+10%FBS. The next day Calcitriol and Taxol were added at concentrations of 25nM and 1.5nM respectively (Day0). For ZR75B, 4000 cells/well were plated in 96 well plates in DMEM+10%FBS. 50nM Calcitriol and 5nM ICI180,782 were added the next day with fresh medium (Day0). Media was refreshed every two days and cell proliferation assay was performed on day 6 for above cell lines. The T47D cells were trypsinized with phenol red free Triple Express (Invitrogen) and washed once

with PBS and 10,000 cells/well were plated in phenol red free DMEM+ 5% charcoal stripped FBS (CSFBS) in 96 well plates and cultured for 3 days. On the fourth day, 10nM 17 beta estradiol (E2) was added into all the wells except non-drug treatment group, in addition to 10nM ICI180,782, 10nM R1881 and 50nM Calcitriol in different groups with fresh phenol red free DMEM+5% CSFBS (Day0). Cells were cultured in the same medium for 6 days before counting. All the proliferation assays were carried out using cell titer blue reagent (Promega) and fluorescence was measured using Bio-Tek spectrophotometer at 530/25nm (excitation) and 590/35nm (emission). Vehicle only group was used as control in all the experiments except for T47D, where E2 was used as control.

## SUPPLEMENTAL REFERENCES

1. Nakshatri, H., Srour, E.F., and Badve, S. 2009. Breast cancer stem cells and intrinsic subtypes: controversies rage on. *Curr Stem Cell Res Ther* 4:50-60.
2. Panchision, D.M., Chen, H.L., Pistollato, F., Papini, D., Ni, H.T., and Hawley, T.S. 2007. Optimized flow cytometric analysis of central nervous system tissue reveals novel functional relationships among cells expressing CD133, CD15, and CD24. *Stem Cells* 25:1560-1570.
3. Kordek, R., Potemski, P., Kusinska, R., Pluciennik, E., and Bednarek, A. 2010. Basal keratin expression in breast cancer by quantification of mRNA and by immunohistochemistry. *J Exp Clin Cancer Res* 29:39.
4. Molyneux, G., and Smalley, M.J. 2011. The cell of origin of BRCA1 mutation-associated breast cancer: a cautionary tale of gene expression profiling. *J Mammary Gland Biol Neoplasia* 16:51-55.
5. Molyneux, G., Geyer, F.C., Magnay, F.A., McCarthy, A., Kendrick, H., Natrajan, R., Mackay, A., Grigoriadis, A., Tutt, A., Ashworth, A., et al. 2010. BRCA1 basal-like breast cancers originate from luminal epithelial progenitors and not from basal stem cells. *Cell Stem Cell* 7:403-417.
6. Lim, E., Vaillant, F., Wu, D., Forrest, N.C., Pal, B., Hart, A.H., Asselin-Labat, M.L., Gyorki, D.E., Ward, T., Partanen, A., et al. 2009. Aberrant luminal progenitors as the candidate target population for basal tumor development in BRCA1 mutation carriers. *Nat Med* 15:907-913.
7. Gusterson, B.A., Ross, D.T., Heath, V.J., and Stein, T. 2005. Basal cytokeratins and their relationship to the cellular origin and functional classification of breast cancer. *Breast Cancer Res* 7:143-148.
8. Gusterson, B. 2009. Do 'basal-like' breast cancers really exist? *Nat Rev Cancer* 9:128-134.
9. Ince, T.A., Ward, J.M., Valli, V.E., Sgroi, D., Nikitin, A.Y., Loda, M., Griffey, S.M., Crum, C.P., Crawford, J.M., Bronson, R.T., et al. 2008. Do-it-yourself (DIY) pathology. *Nat Biotechnol* 26:978-979; discussion 979.
10. Grigoriadis, A., Mackay, A., Reis-Filho, J.S., Steele, D., Iseli, C., Stevenson, B.J., Jongeneel, C.V., Valgeirsson, H., Fenwick, K., Iravani, M., et al. 2006. Establishment of the epithelial-specific transcriptome of normal and malignant human breast cells based on MPSS and array expression data. *Breast Cancer Res* 8:R56.
11. Jones, C., Mackay, A., Grigoriadis, A., Cossu, A., Reis-Filho, J.S., Fulford, L., Dexter, T., Davies, S., Bulmer, K., Ford, E., et al. 2004. Expression profiling of purified normal human luminal and myoepithelial breast cells: identification of novel prognostic markers for breast cancer. *Cancer Res* 64:3037-3045.
12. Desmedt, C., Piette, F., Loi, S., Wang, Y., Lallemand, F., Haibe-Kains, B., Viale, G., Delorenzi, M., Zhang, Y., d'Assignies, M.S., et al. 2007. Strong time dependence of the 76-gene prognostic signature for node-negative breast cancer patients in the TRANSBIG multicenter independent validation series. *Clin Cancer Res* 13:3207-3214.
13. Ivshina, A.V., George, J., Senko, O., Mow, B., Putti, T.C., Smeds, J., Lindahl, T., Pawitan, Y., Hall, P., Nordgren, H., et al. 2006. Genetic reclassification of

- histologic grade delineates new clinical subtypes of breast cancer. *Cancer Res* 66:10292-10301.
14. Loi, S., Haibe-Kains, B., Desmedt, C., Wirapati, P., Lallemand, F., Tutt, A.M., Gillet, C., Ellis, P., Ryder, K., Reid, J.F., et al. 2008. Predicting prognosis using molecular profiling in estrogen receptor-positive breast cancer treated with tamoxifen. *BMC Genomics* 9:239.
  15. Lu, X., Wang, Z.C., Iglehart, J.D., Zhang, X., and Richardson, A.L. 2008. Predicting features of breast cancer with gene expression patterns. *Breast Cancer Res Treat* 108:191-201.
  16. Harrell, J.C., Prat, A., Parker, J.S., Fan, C., He, X., Carey, L., Anders, C., Ewend, M., and Perou, C.M. 2012. Genomic analysis identifies unique signatures predictive of brain, lung, and liver relapse. *Breast Cancer Res Treat* 132:523-535.
  17. Birrell, S.N., Bentel, J.M., Hickey, T.E., Ricciardelli, C., Weger, M.A., Horsfall, D.J., and Tilley, W.D. 1995. Androgens induce divergent proliferative responses in human breast cancer cell lines. *J Steroid Biochem Mol Biol* 52:459-467.
  18. Naderi, A., and Hughes-Davies, L. 2008. A functionally significant cross-talk between androgen receptor and ErbB2 pathways in estrogen receptor negative breast cancer. *Neoplasia* 10:542-548.
  19. Emde, A., Mahlknecht, G., Maslak, K., Ribba, B., Sela, M., Possinger, K., and Yarden, Y. 2011. Simultaneous Inhibition of Estrogen Receptor and the HER2 Pathway in Breast Cancer: Effects of HER2 Abundance. *Transl Oncol* 4:293-300.
  20. Lakhani, S.R., Reis-Filho, J.S., Fulford, L., Penault-Llorca, F., van der Vijver, M., Parry, S., Bishop, T., Benitez, J., Rivas, C., Bignon, Y.J., et al. 2005. Prediction of BRCA1 status in patients with breast cancer using estrogen receptor and basal phenotype. *Clin Cancer Res* 11:5175-5180.
  21. Raouf, A., Zhao, Y., To, K., Stingl, J., Delaney, A., Barbara, M., Iscove, N., Jones, S., McKinney, S., Emerman, J., et al. 2008. Transcriptome analysis of the normal human mammary cell commitment and differentiation process. *Cell Stem Cell* 3:109-118.
  22. Richardson, A.L., Wang, Z.C., De Nicolo, A., Lu, X., Brown, M., Miron, A., Liao, X., Iglehart, J.D., Livingston, D.M., and Ganesan, S. 2006. X chromosomal abnormalities in basal-like human breast cancer. *Cancer Cell* 9:121-132.
  23. Garbe, J.C., Pepin, F., Pelissier, F.A., Sputova, K., Fridriksdottir, A.J., Guo, D.E., Villadsen, R., Park, M., Petersen, O.W., Borowsky, A.D., et al. 2012. Accumulation of multipotent progenitors with a basal differentiation bias during aging of human mammary epithelia. *Cancer Res* 72:3687-3701.
  24. Santagata, S., Hu, R., Lin, N.U., Mendillo, M.L., Collins, L.C., Hankinson, S.E., Schnitt, S.J., Whitesell, L., Tamimi, R.M., Lindquist, S., et al. 2011. High levels of nuclear heat-shock factor 1 (HSF1) are associated with poor prognosis in breast cancer. *Proc Natl Acad Sci U S A* 108:18378-18383.
  25. Dawood, S., Hu, R., Homes, M.D., Collins, L.C., Schnitt, S.J., Connolly, J., Colditz, G.A., and Tamimi, R.M. 2011. Defining breast cancer prognosis based on molecular phenotypes: results from a large cohort study. *Breast Cancer Res Treat* 126:185-192.

26. Gerner, M.Y., Kastenmuller, W., Ifrim, I., Kabat, J., and Germain, R.N. 2012. Histo-cytometry: a method for highly multiplex quantitative tissue imaging analysis applied to dendritic cell subset microanatomy in lymph nodes. *Immunity* 37:364-376.
27. Robertson, D., Savage, K., Reis-Filho, J.S., and Isacke, C.M. 2008. Multiple immunofluorescence labelling of formalin-fixed paraffin-embedded (FFPE) tissue. *BMC Cell Biol* 9:13.
28. Tsurui, H., Nishimura, H., Hattori, S., Hirose, S., Okumura, K., and Shirai, T. 2000. Seven-color fluorescence imaging of tissue samples based on Fourier spectroscopy and singular value decomposition. *J Histochem Cytochem* 48:653-662.
29. Shi, S.R., Shi, Y., and Taylor, C.R. 2011. Antigen retrieval immunohistochemistry: review and future prospects in research and diagnosis over two decades. *J Histochem Cytochem* 59:13-32.
30. Glass, G., Papin, J.A., and Mandell, J.W. 2009. SIMPLE: a sequential immunoperoxidase labeling and erasing method. *J Histochem Cytochem* 57:899-905.
31. Gerdes M.J., Sevinsky C.J., Sood A., Adak S., Bello M.O., Bordwell A., Can A., Corwin A., Dinn S., Filkins R.J., Hollman D., et al., Highly multiplexed single-cell analysis of formalin-fixed, paraffin-embedded cancer tissue. 2013. *Proc Natl Acad Sci U S A*. 10(29):11982-7.

Table S2A K5+ER

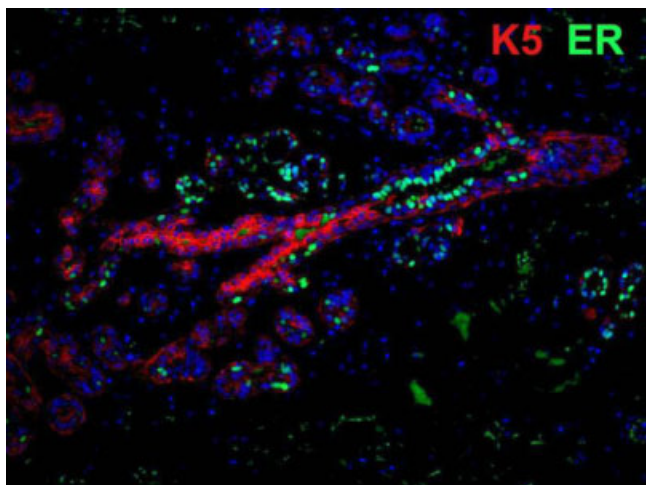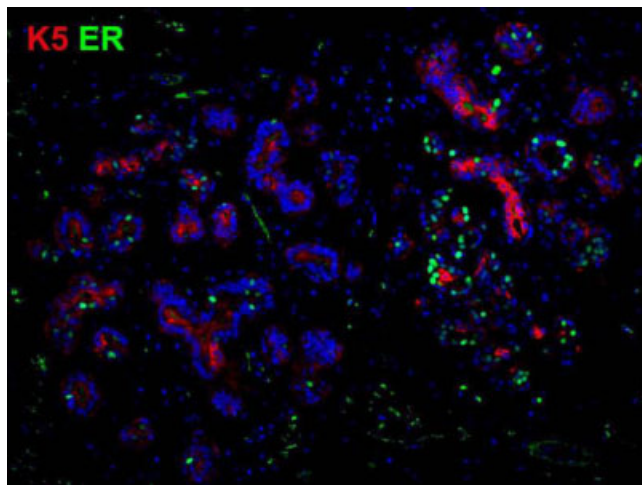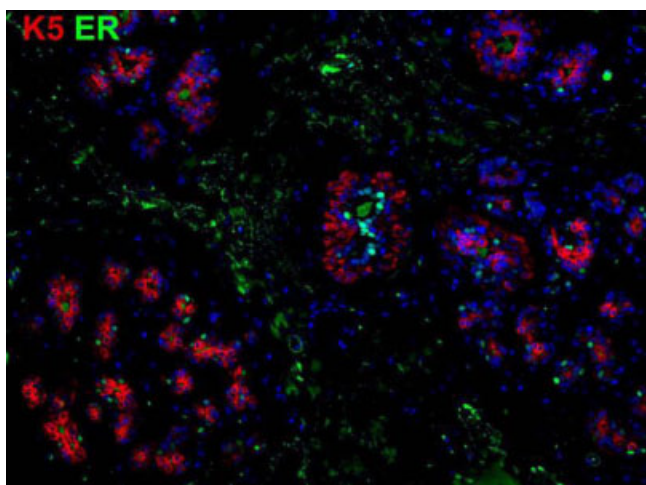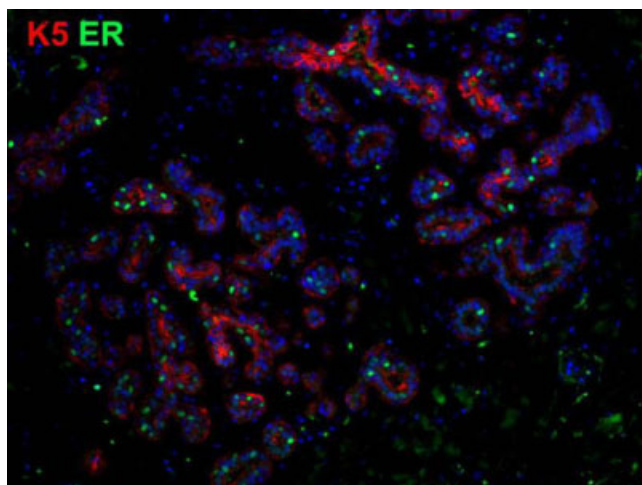



Table S2A K14+ER

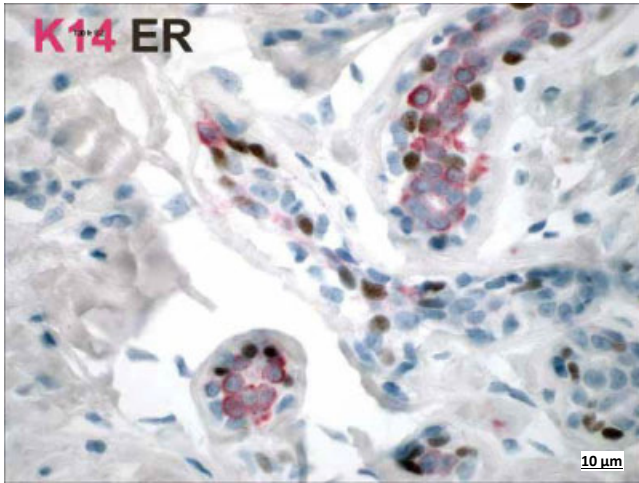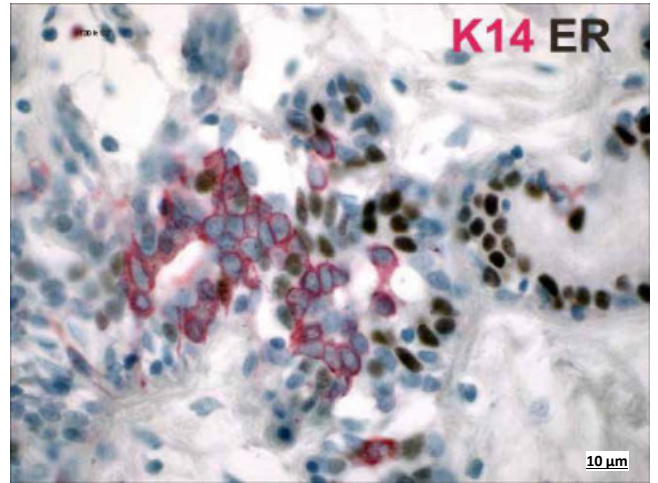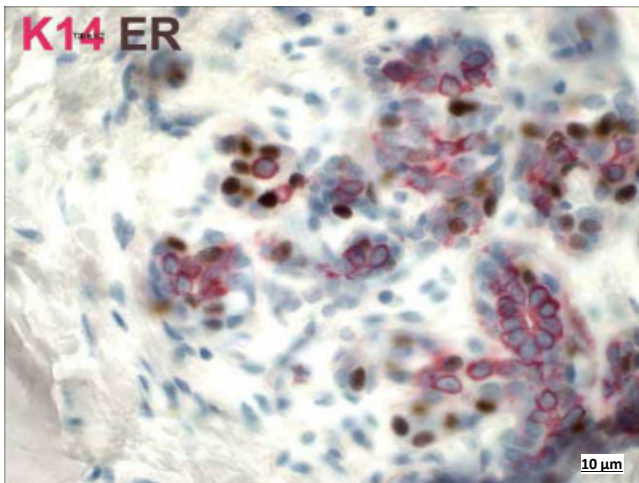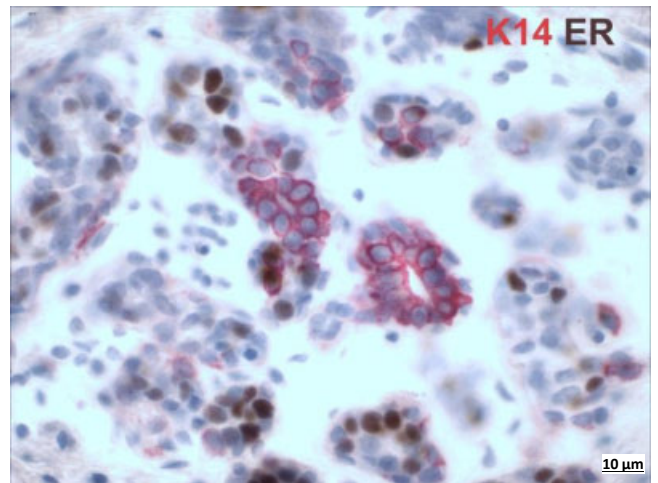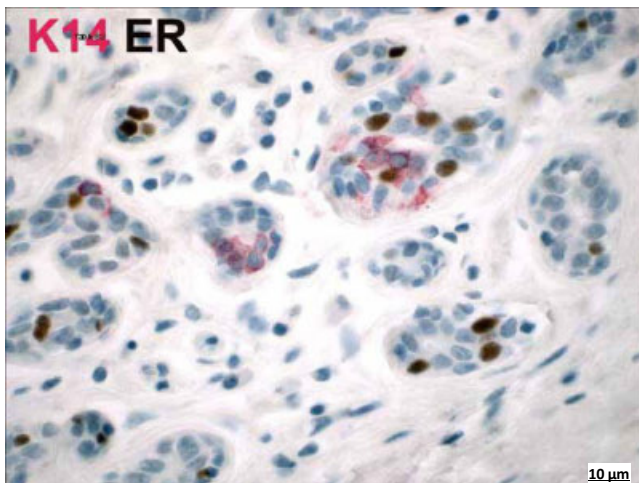

Table S2A K17+ER

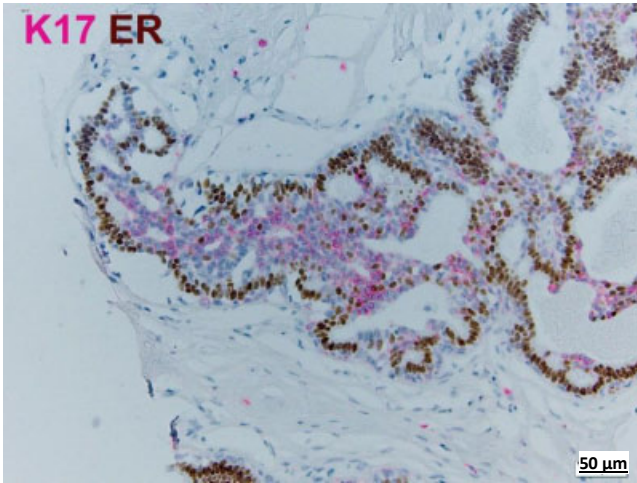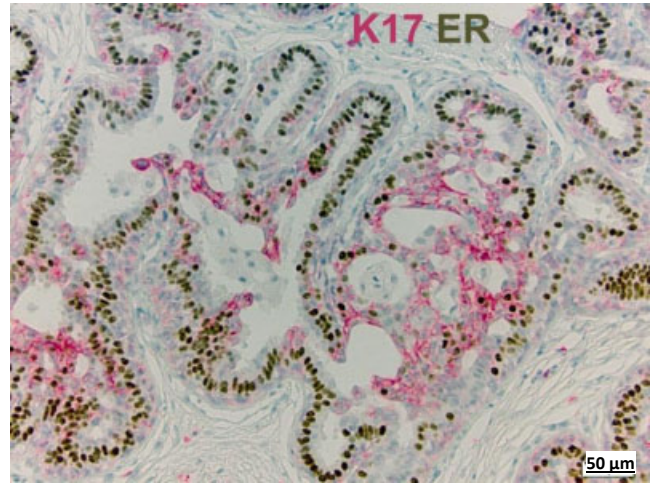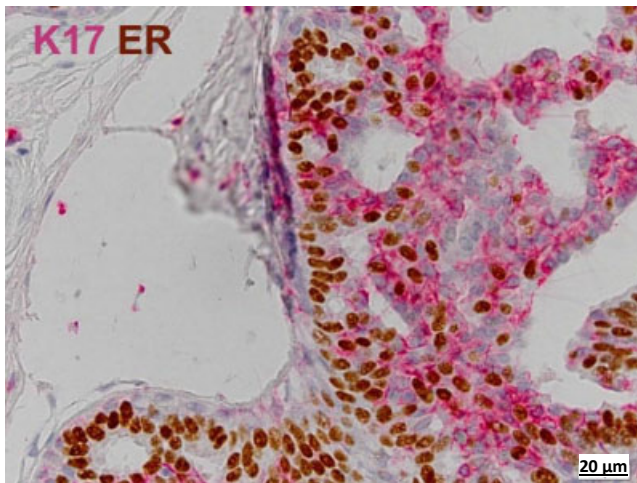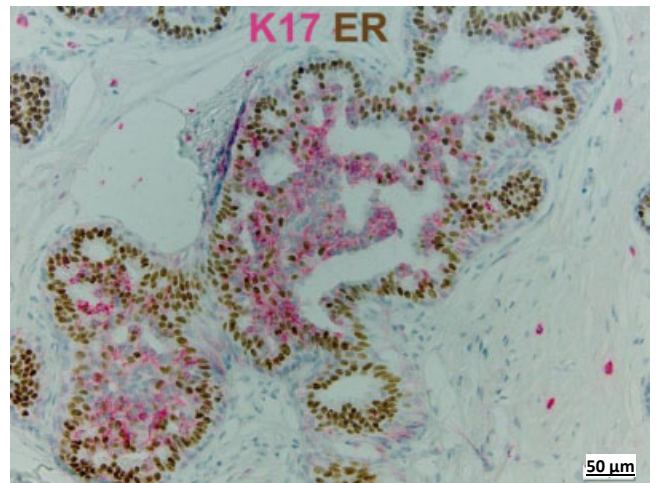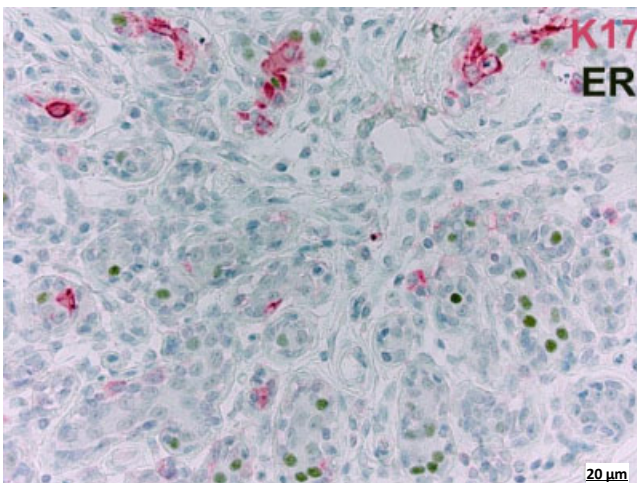

Table S2B ER+Ki67

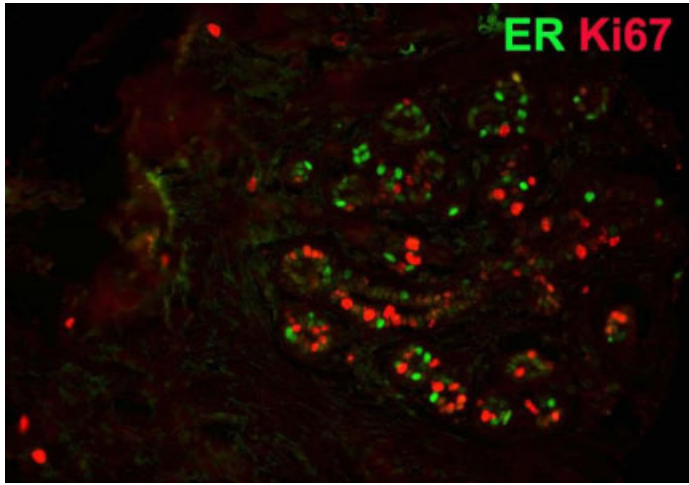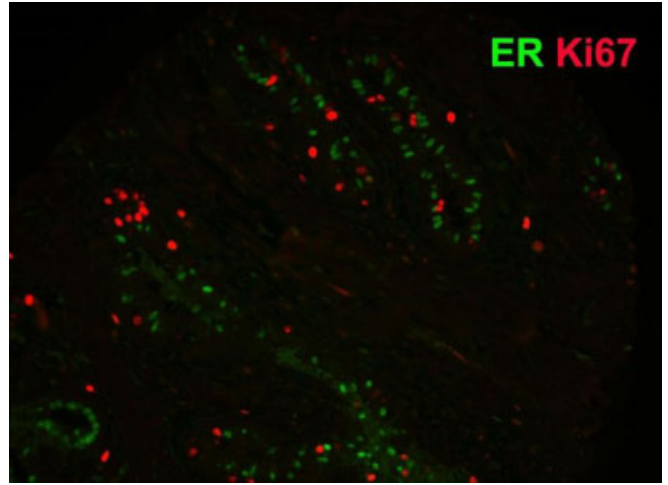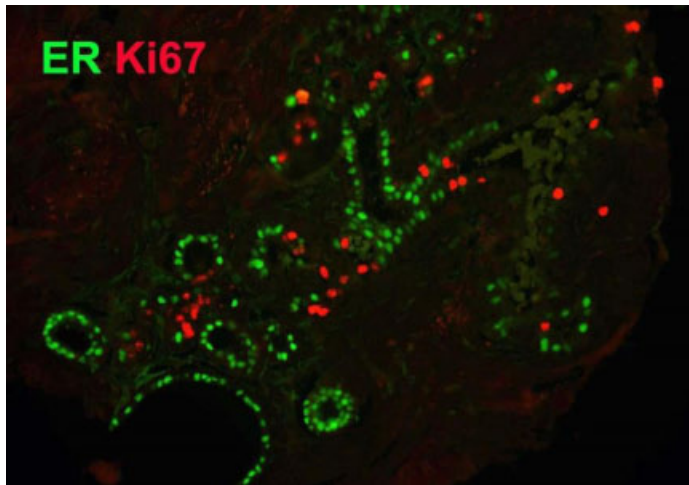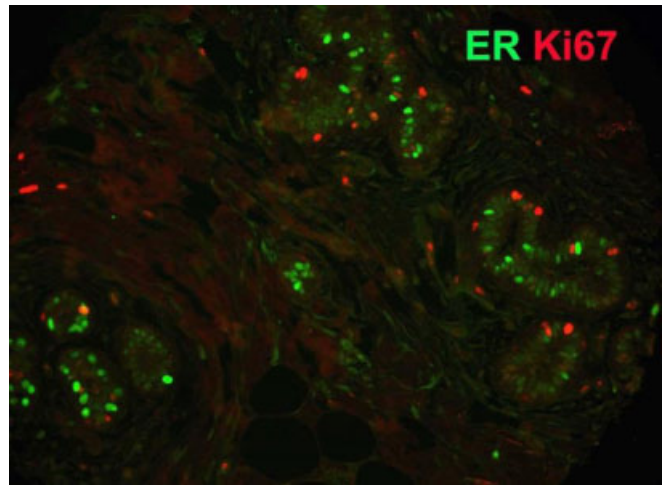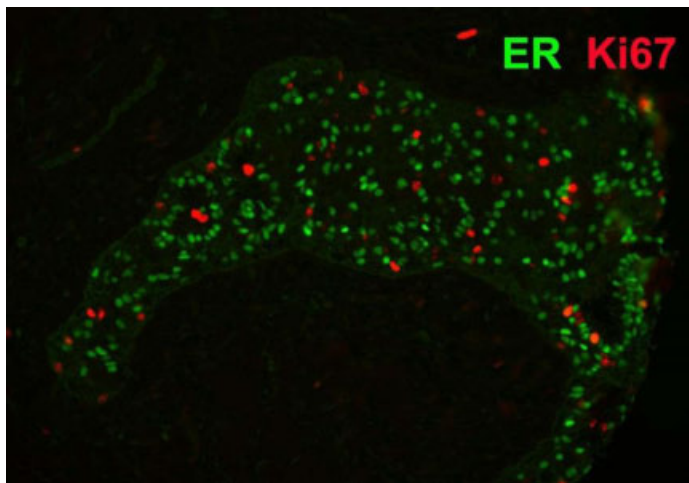

Table S2B K14+Ki67

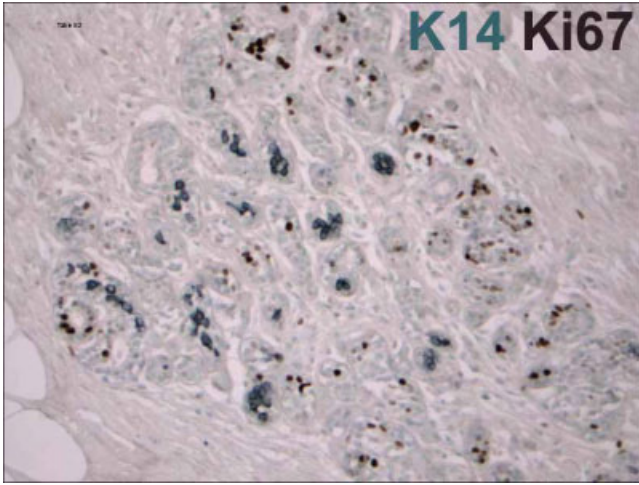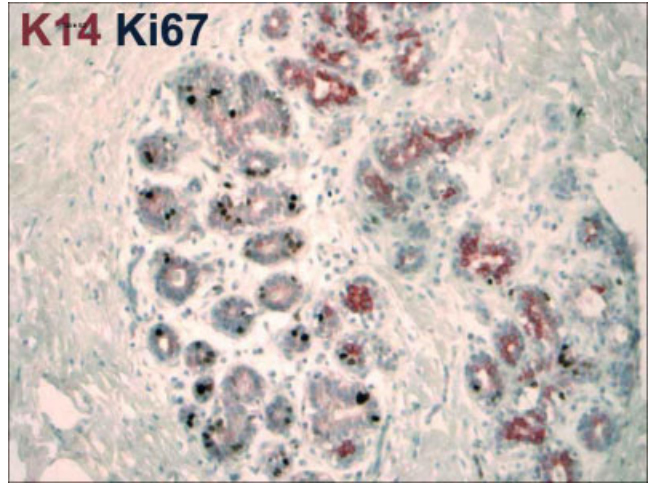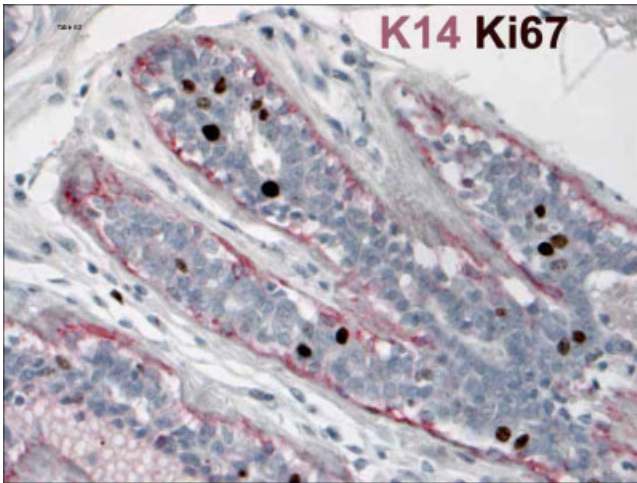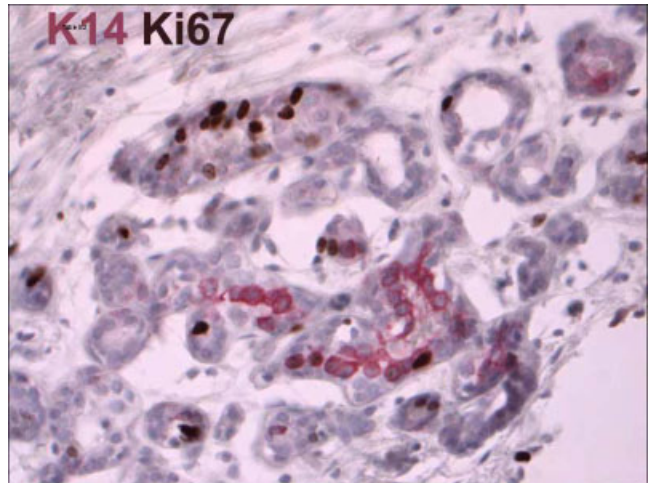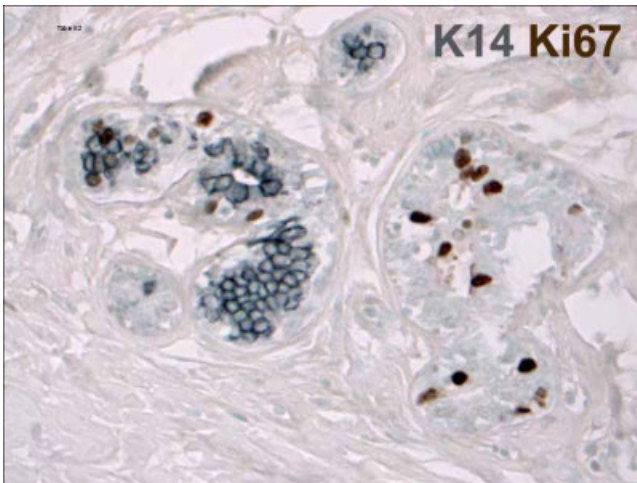

Table S2B K5+Ki67

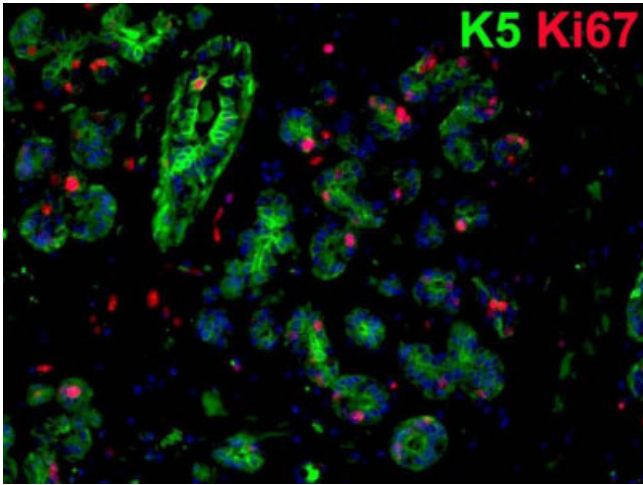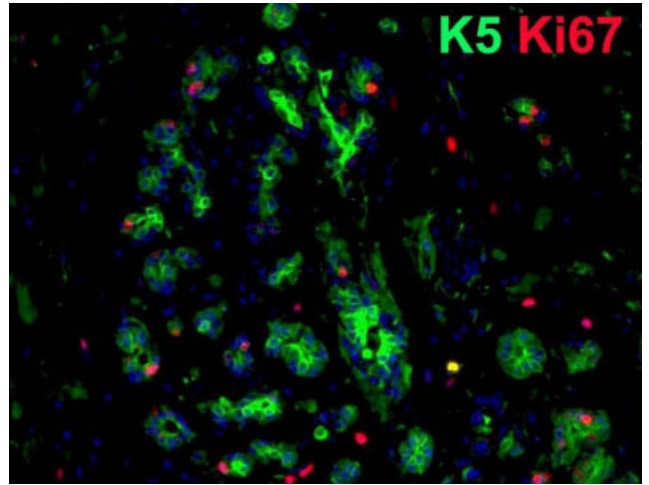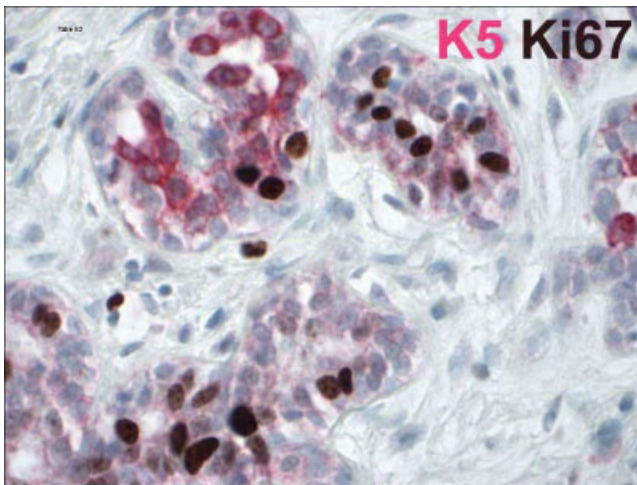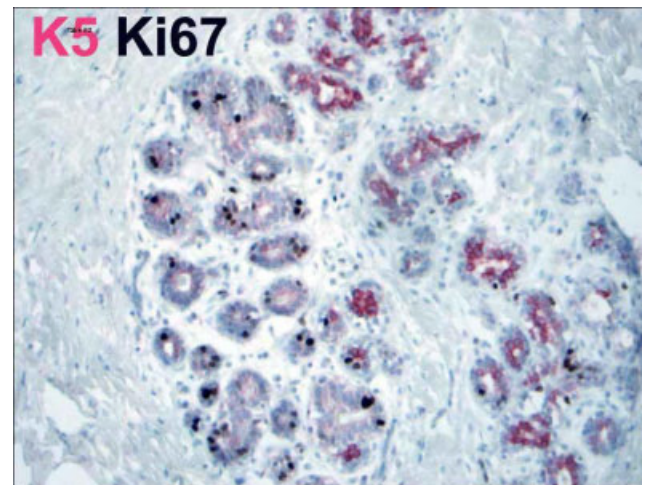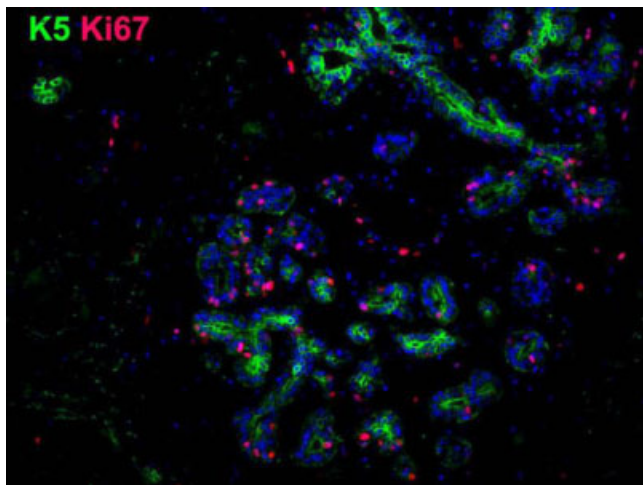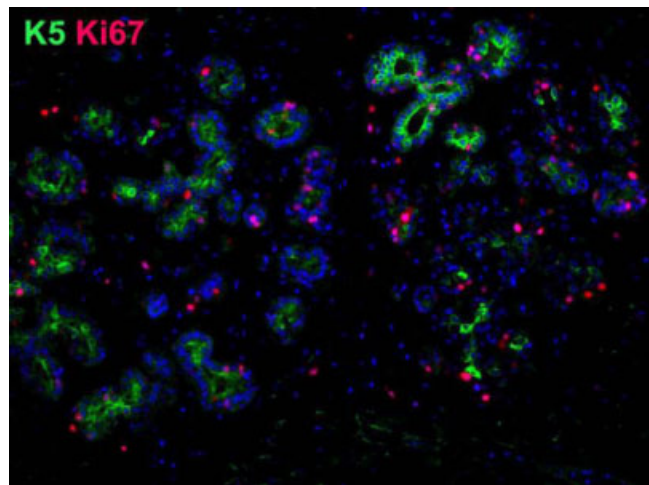

Table S2B K17+Ki67

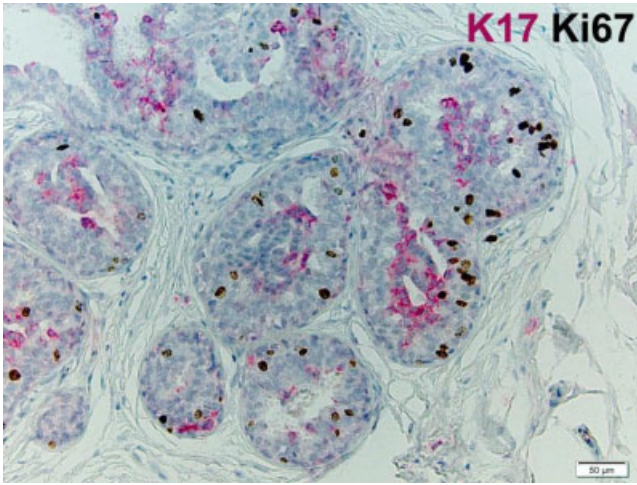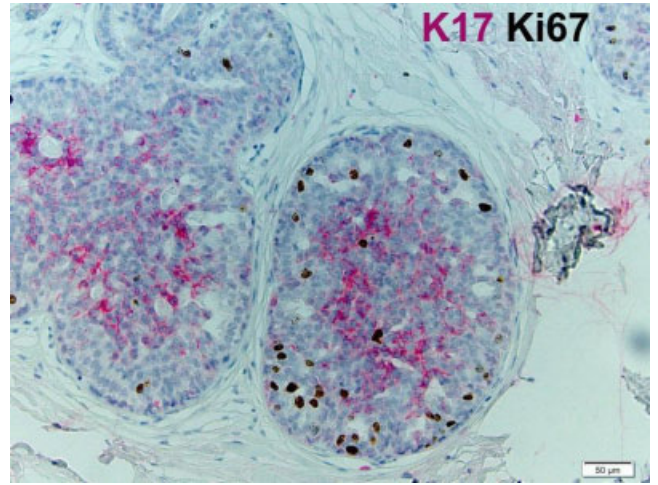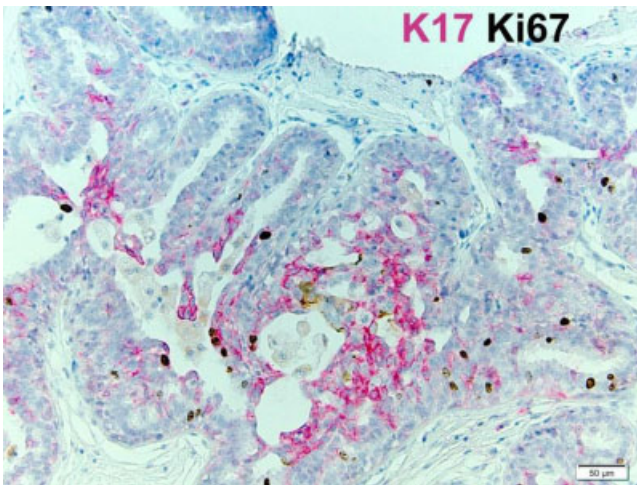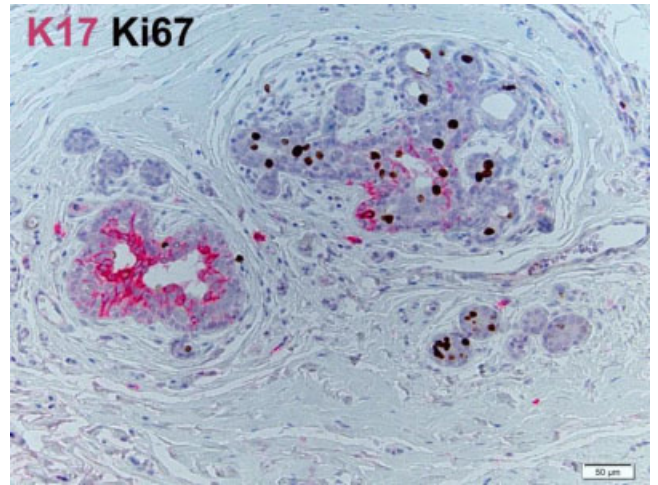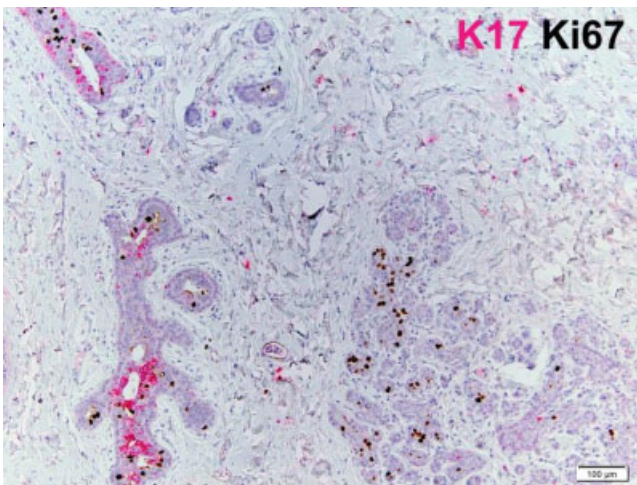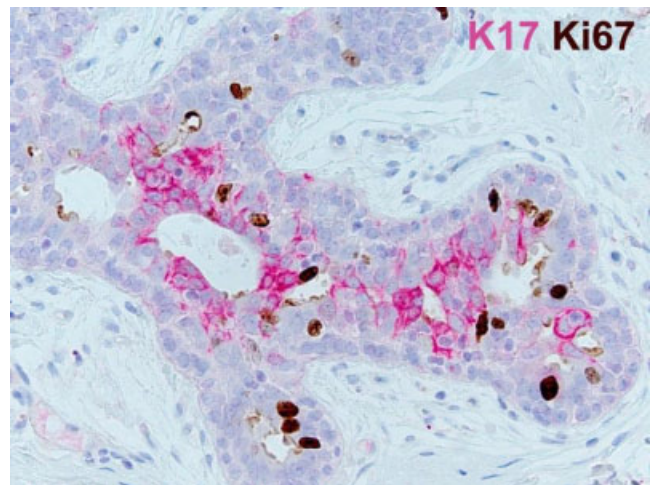

Table S2C K5+AR

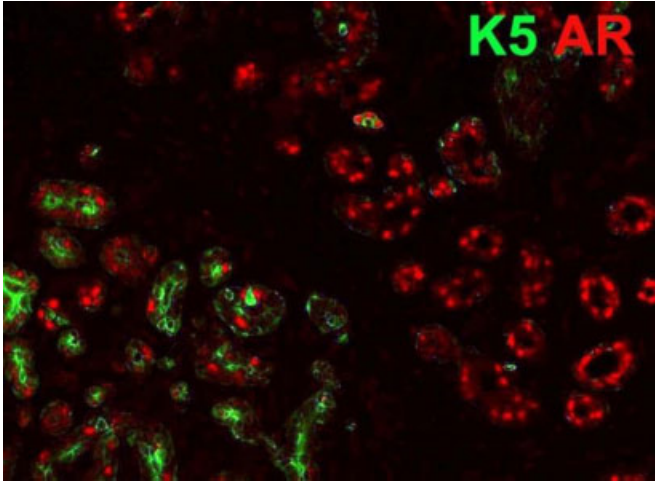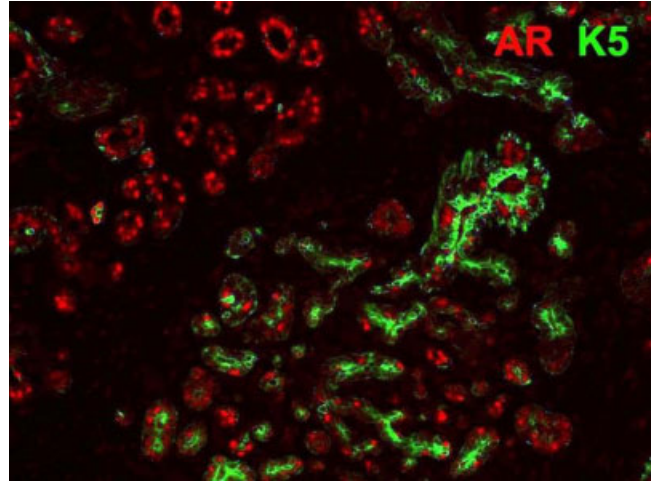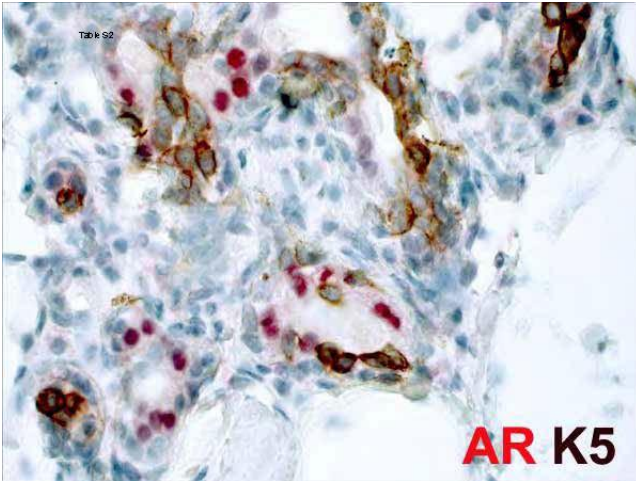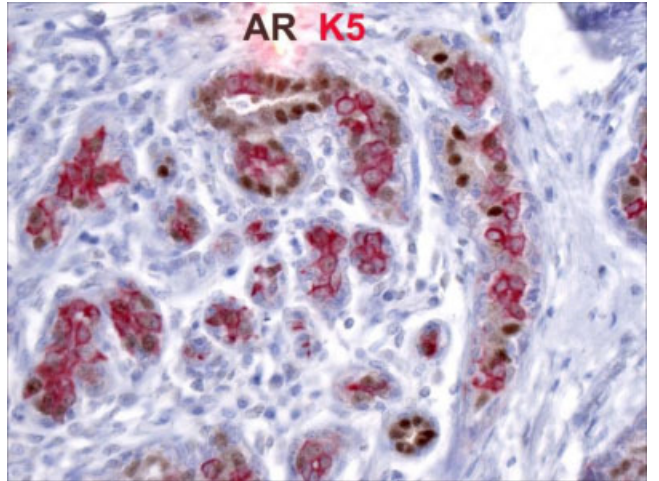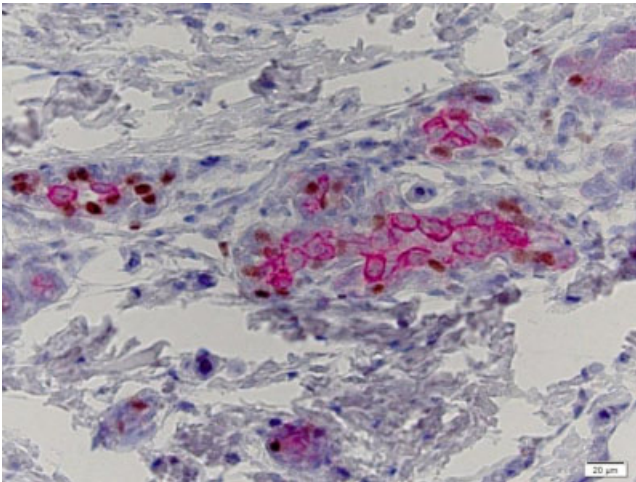

Table S2C K14+AR

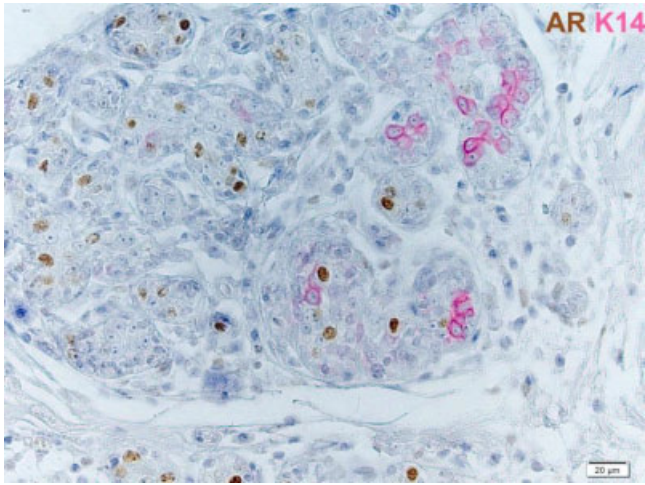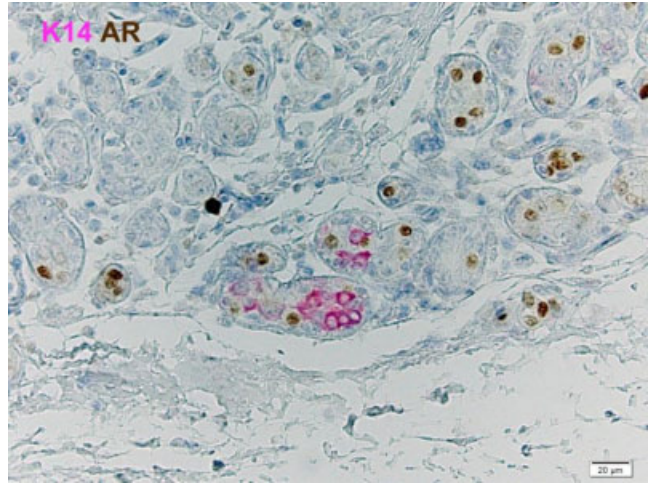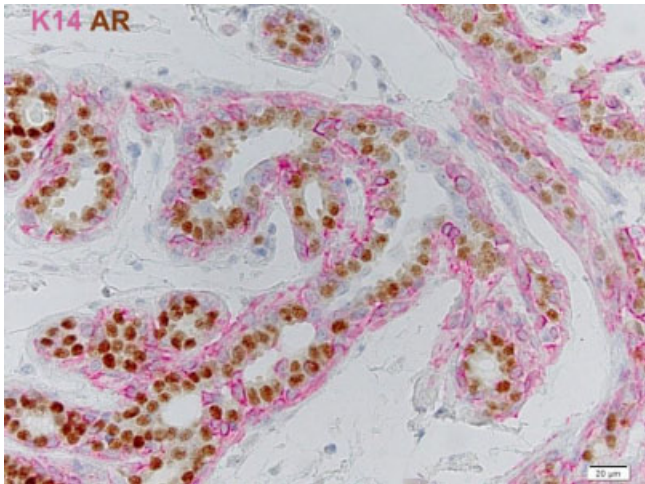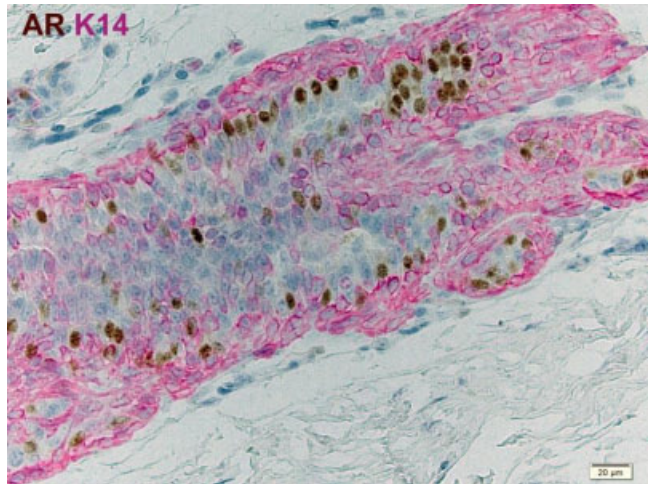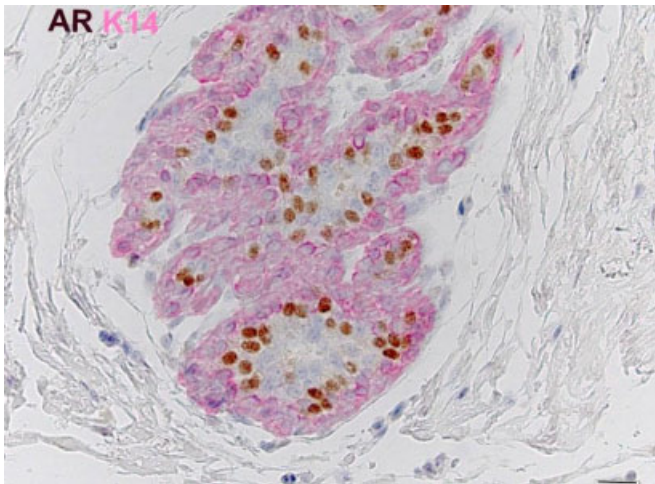



Table S2C AR+Ki67

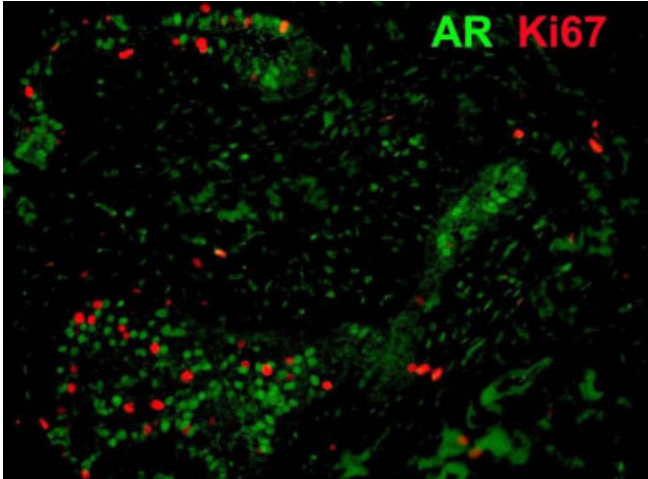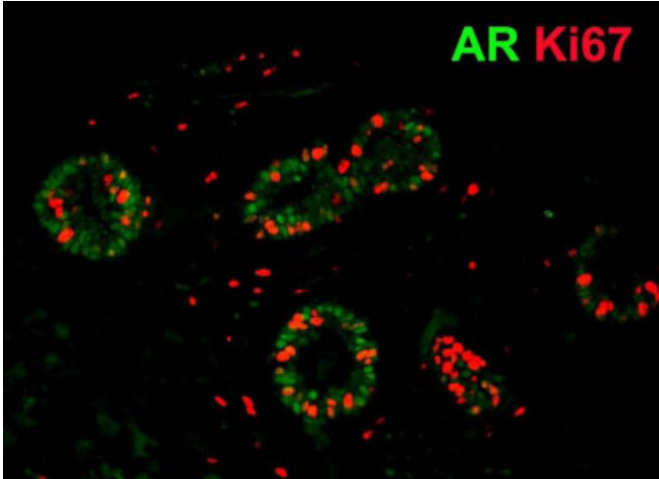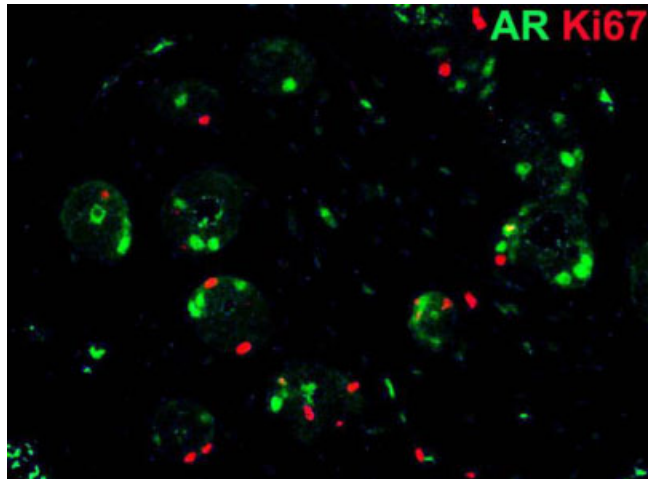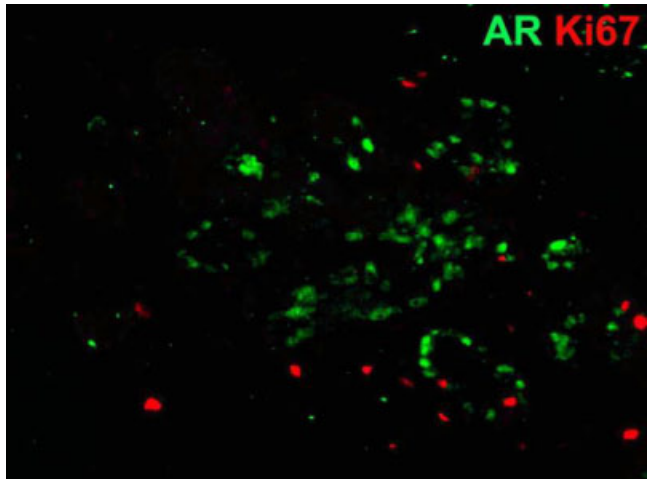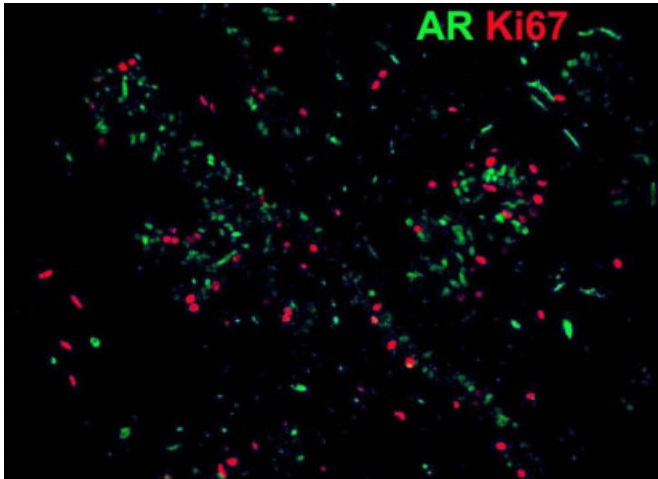

Table S2C ER+AR

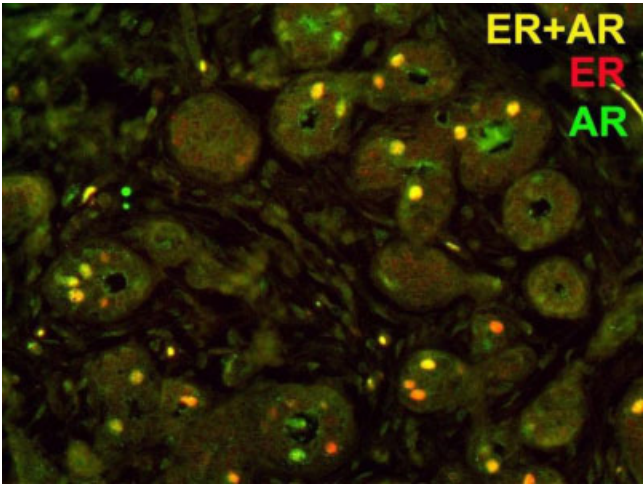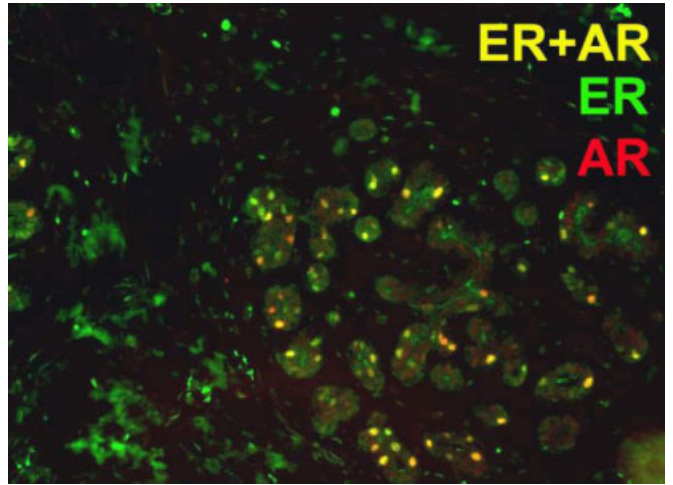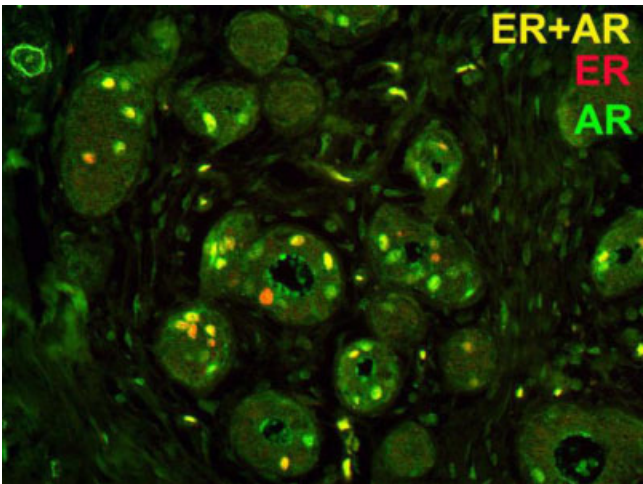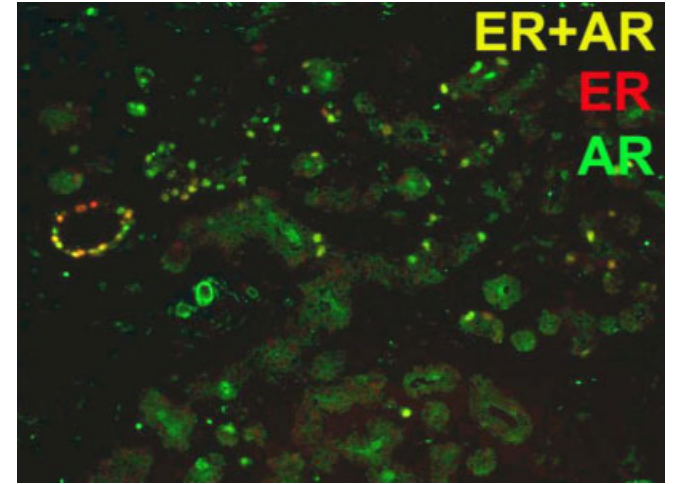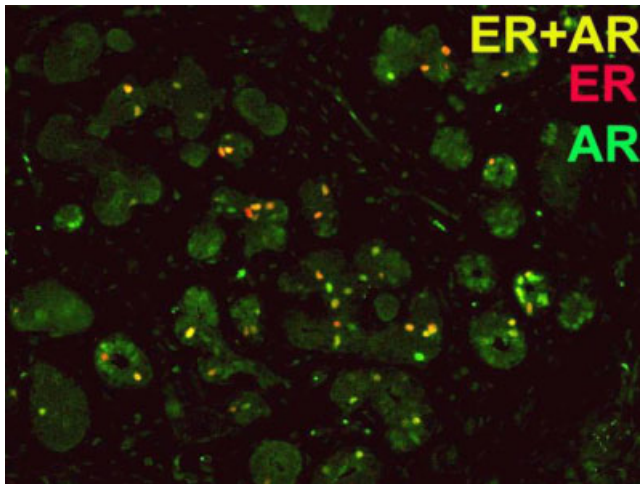

Table S2D K5+VDR

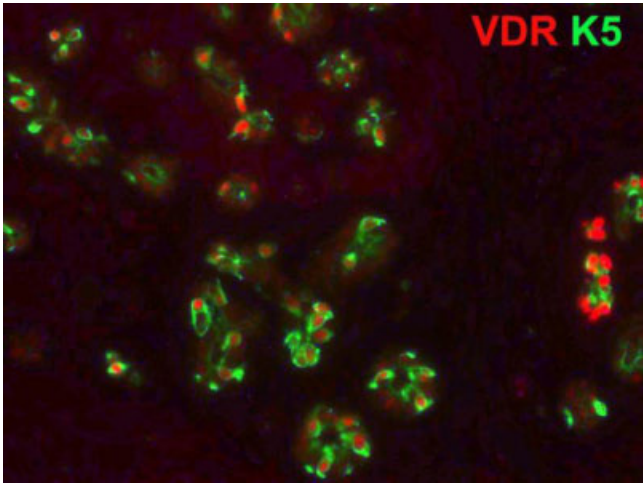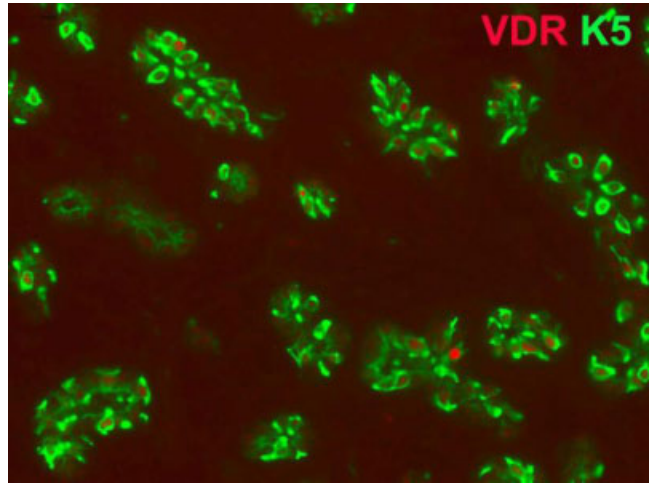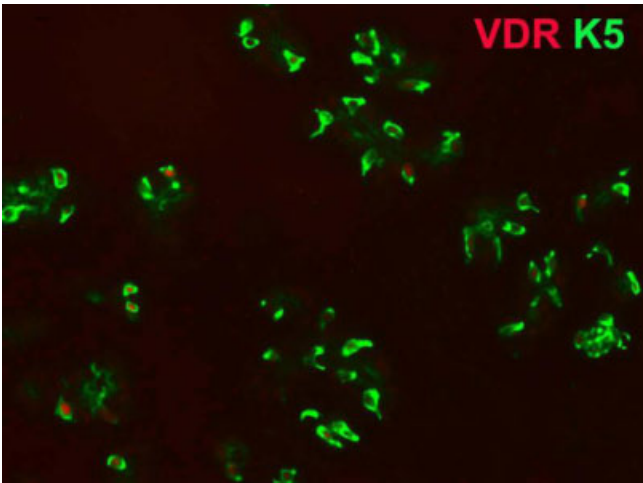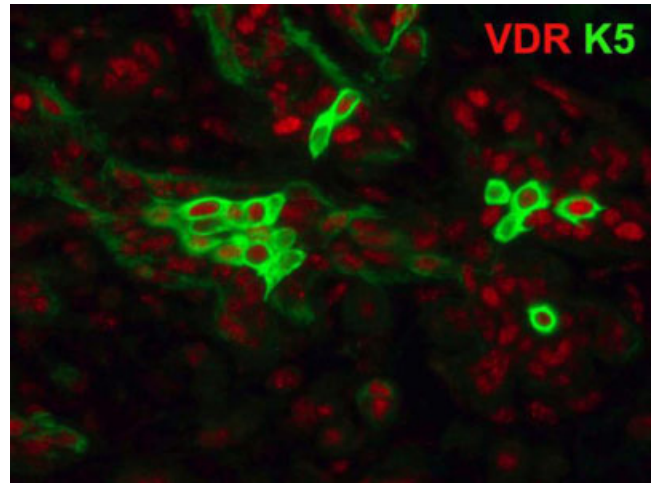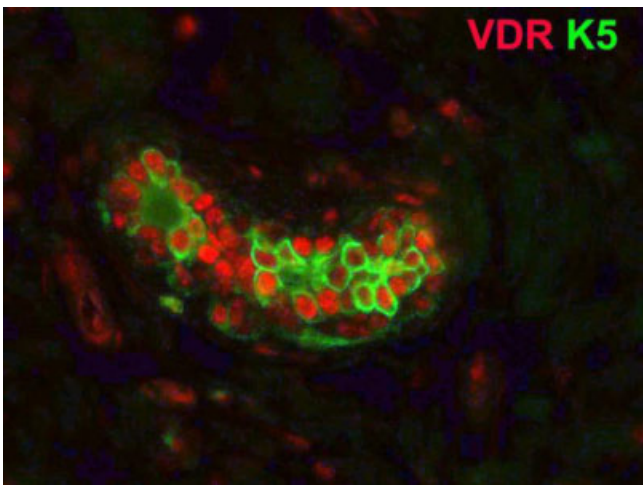

Table S2D VDR+Ki67

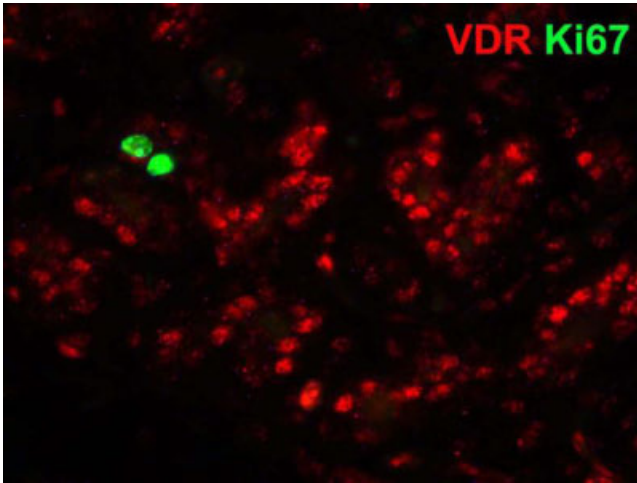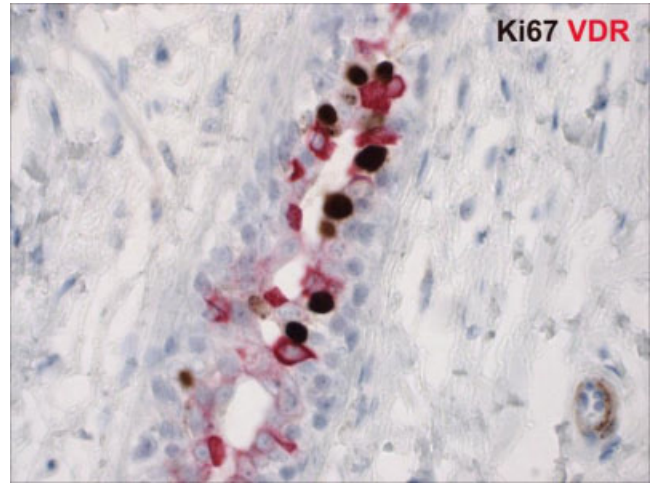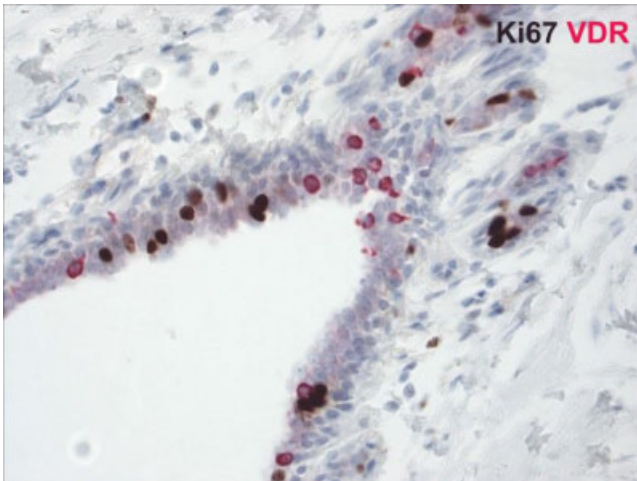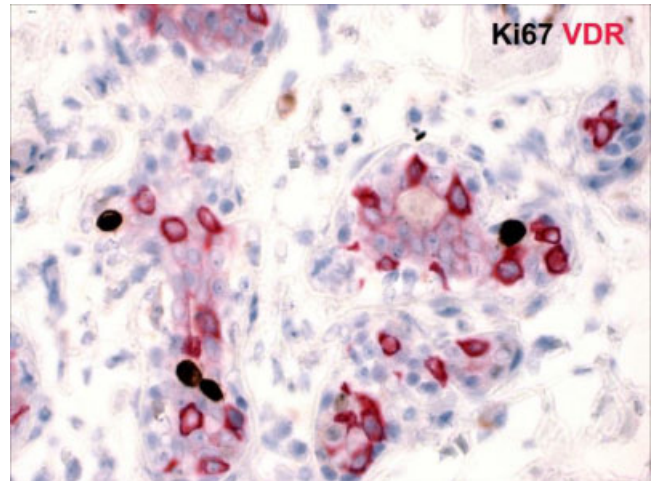

Table S2D AR+VDR

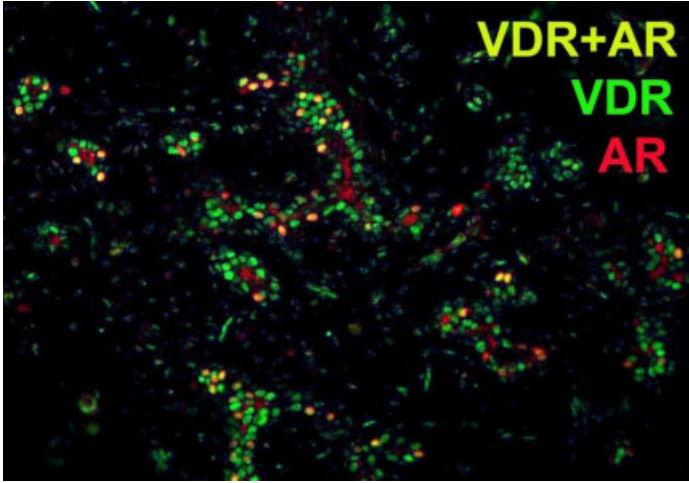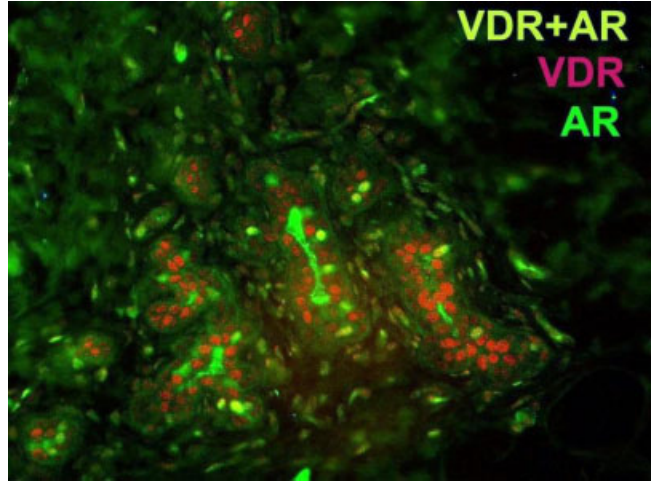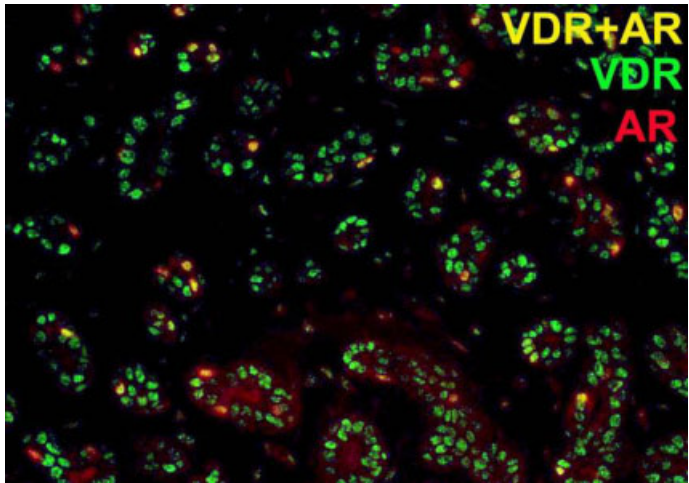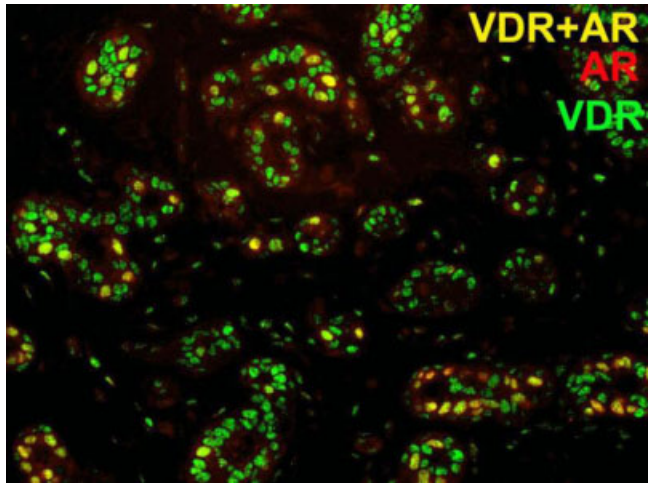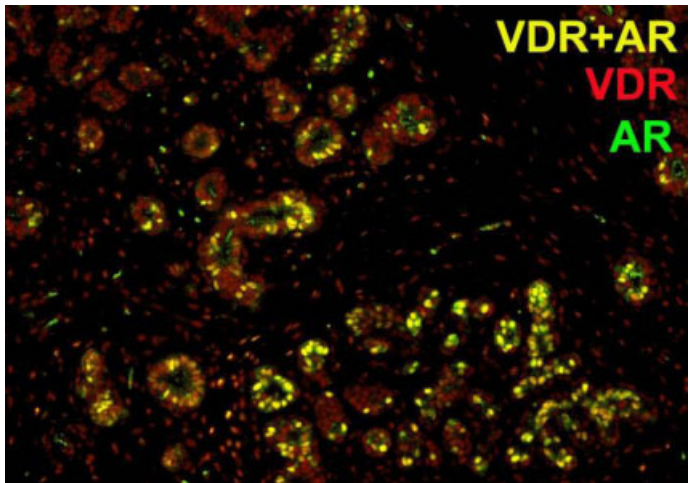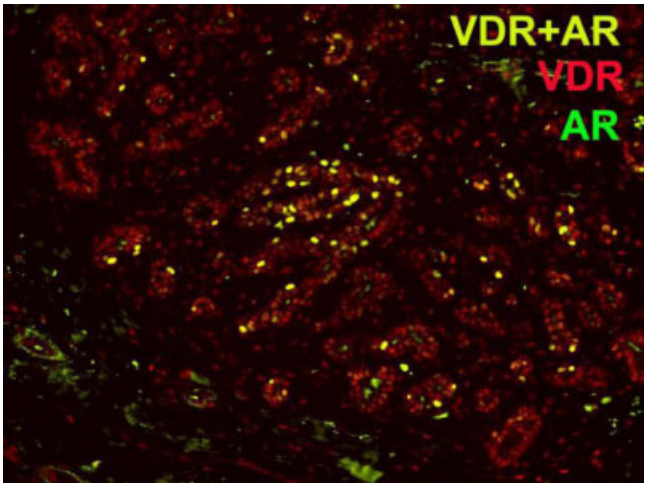

Table S2D ER+VDR

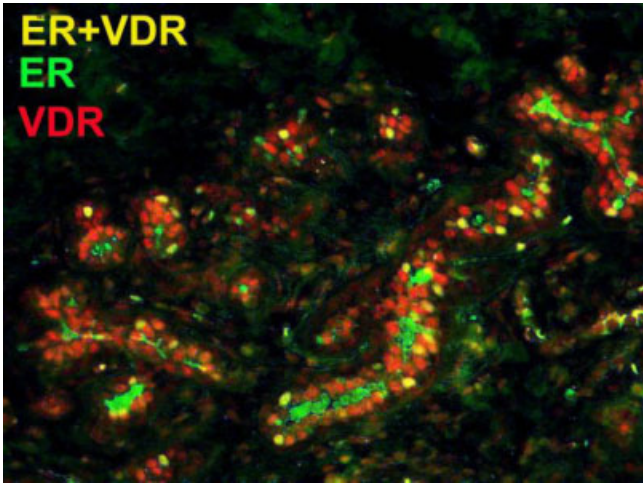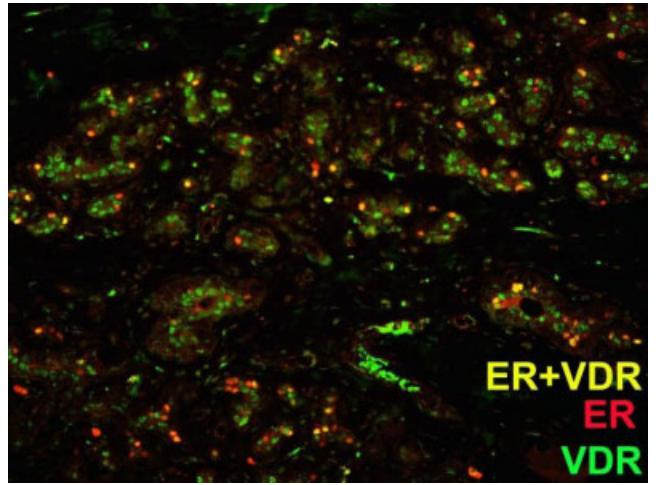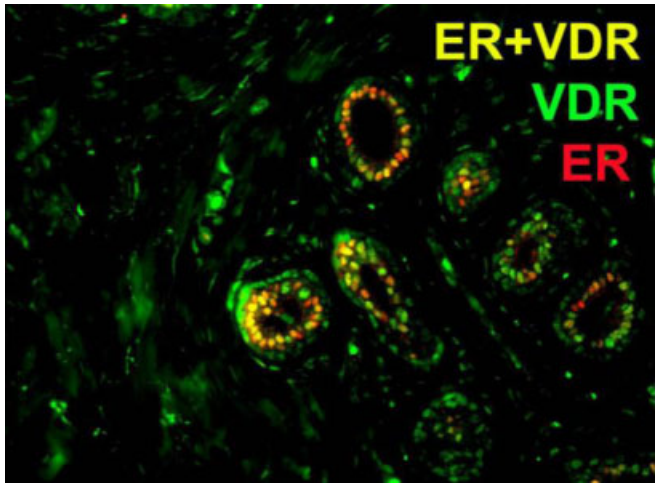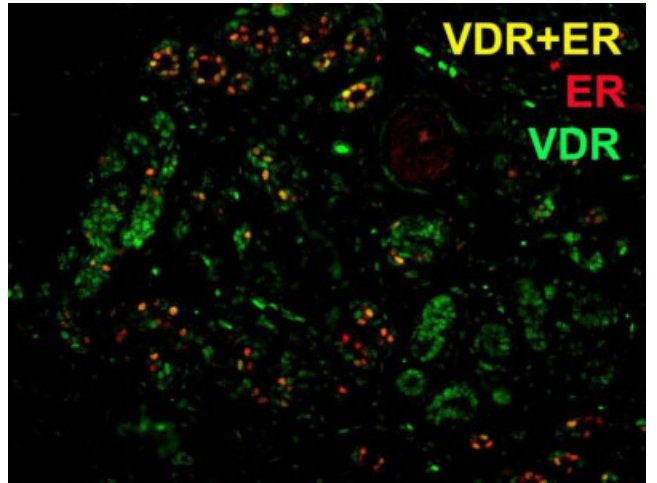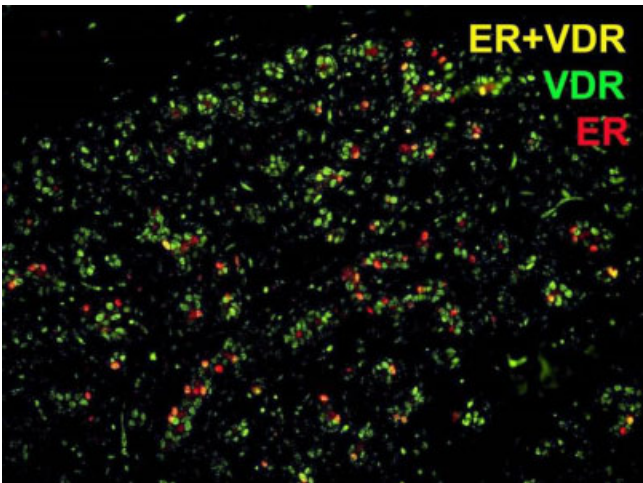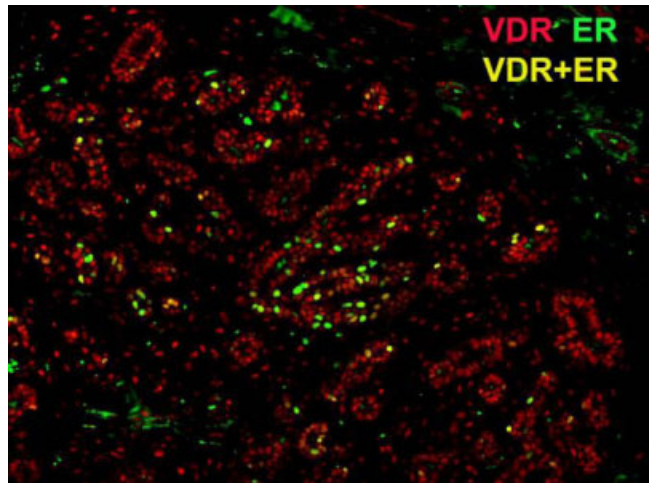

Table S2E CD10+Ki67

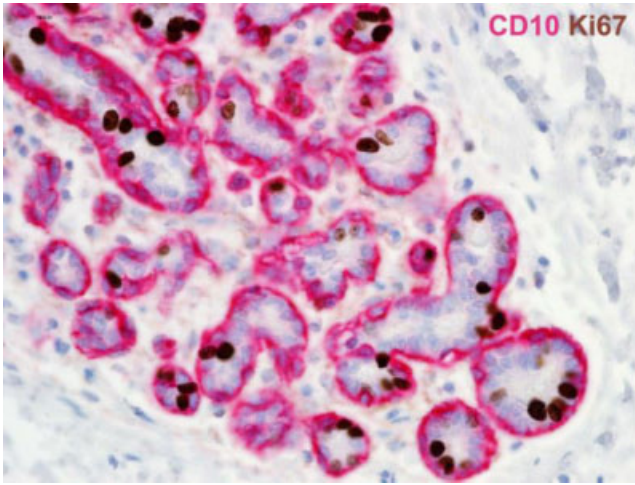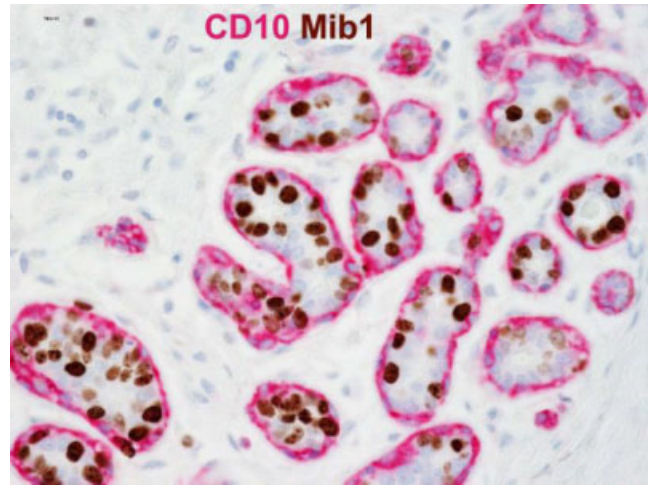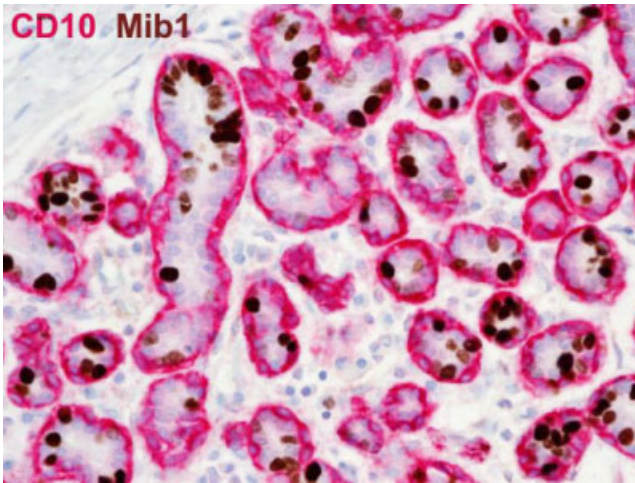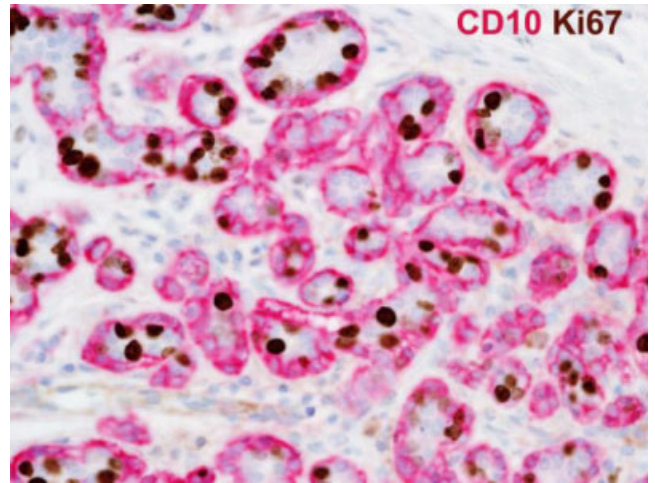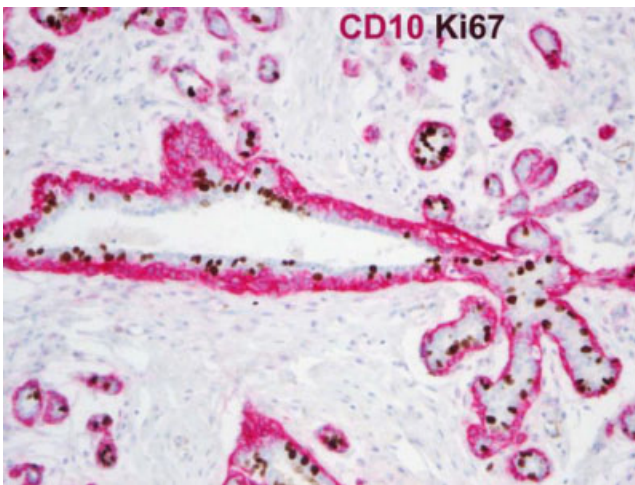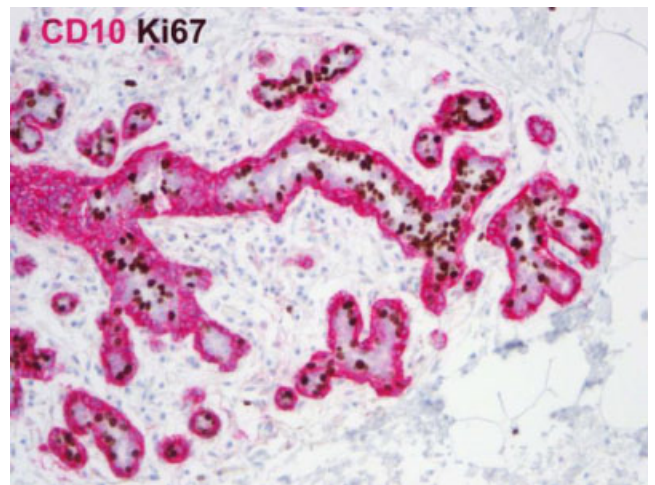

Table S2F K14+K18

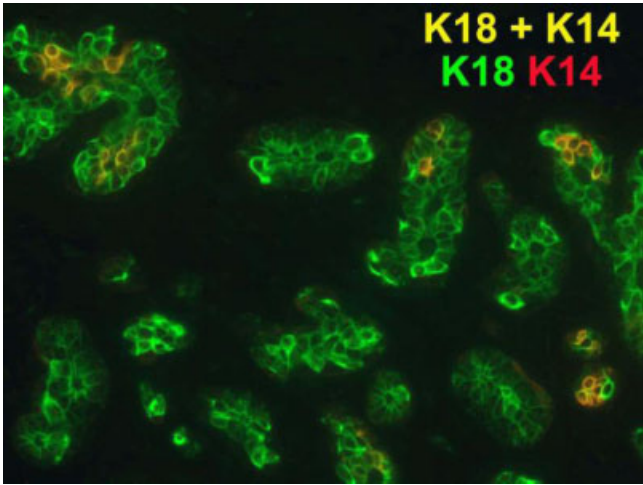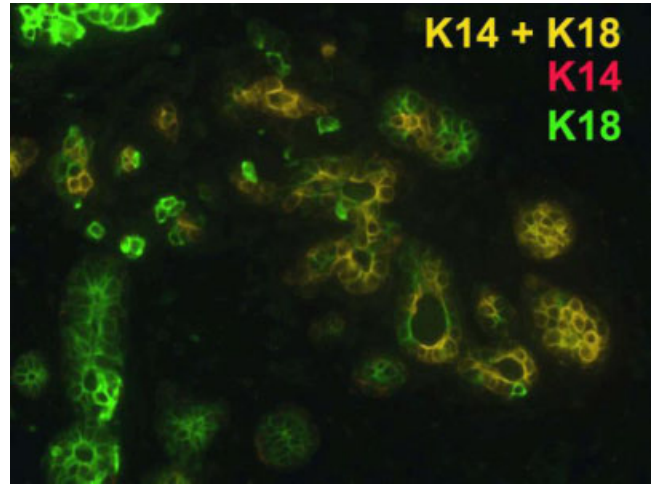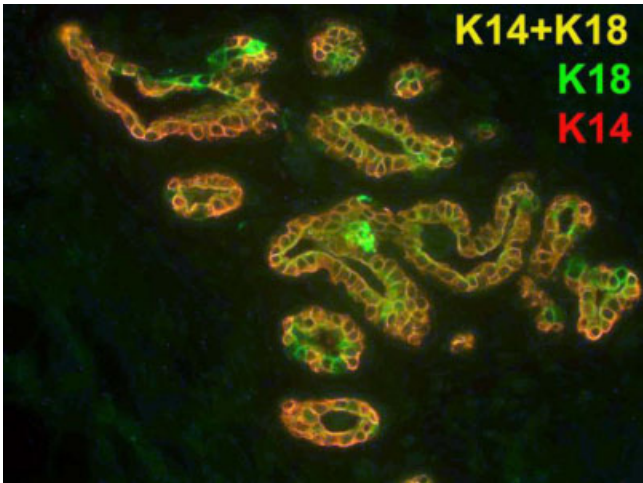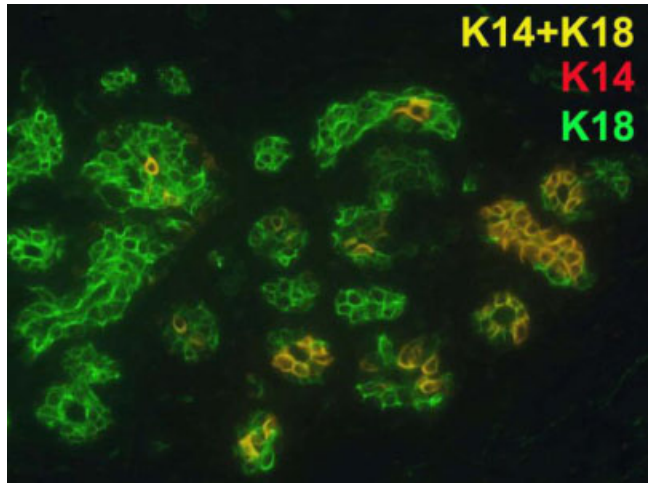



Table S2F K5+K18

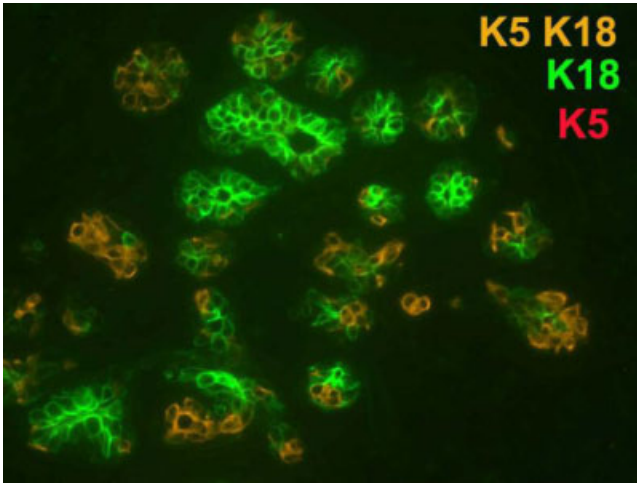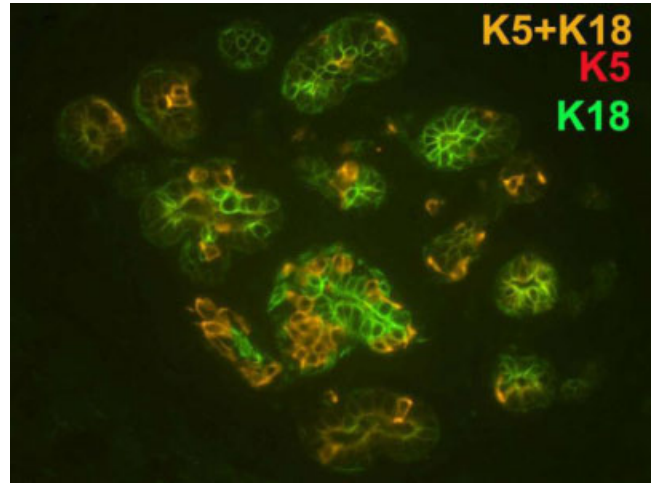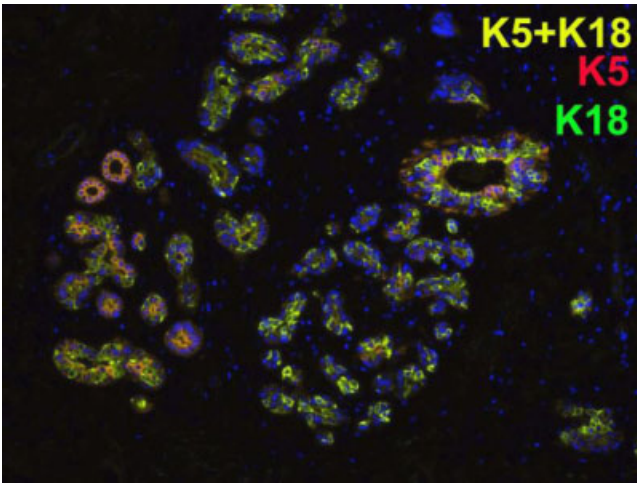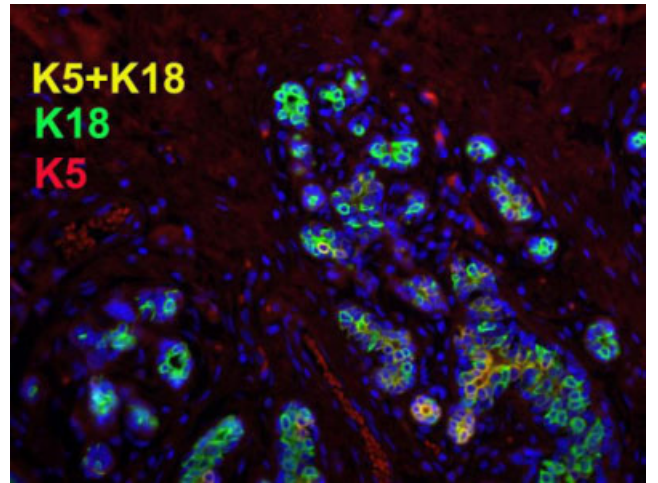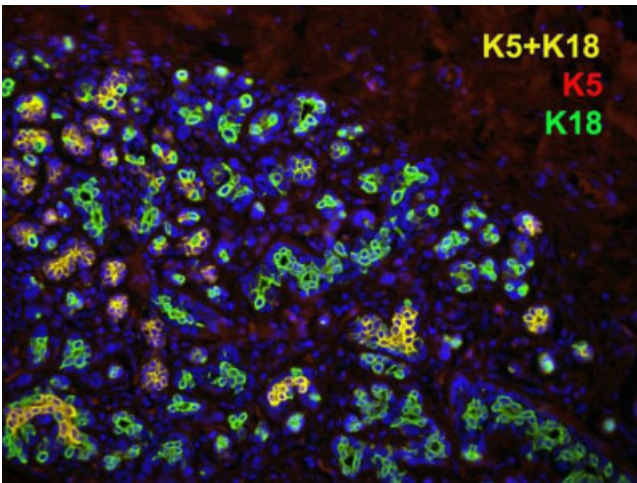

Supplement: sd1 [file 1]
